# Supplementary material for: A molecular contact theory for simulating polarization: application to dielectric constant prediction
Source: Royal Society of Chemistry journal article supplement (doi:10.1039/c9cp02358e), 2019-01-01
Supplement: c9cp02358e1.xlsx [file c9cp02358e1.xlsx]

## Sheet: pure
molecule	εr,exp	εr,calc	Griffith's class (exp)	Griffith's class (calc)
hcn	114.9	136.569	4	4
h2o	80.1	89.2393	4	4
methanol	33	39.4802	3	4
formamide	111	106.662	4	4
methylformamide	189	148.236	4	4
dimethylformamide	38.25	37.7835	4	4
ethanol	25.3	30.5737	3	3
propanol	20.8	23.2763	3	3
1-butanol	17.84	18.5776	3	3
propanone	21.01	23.8255	3	3
1-pentanol	15.13	14.8241	3	3
1-hexanol	13.03	13.4542	3	3
glycol	41.1	41.9766	4	4
diethanolamine	25.75	24.7752	3	3
glycerol	46.53	38.4503	4	4
hydrazine	51.7	52.7368	4	4
formicacid	51.1	50.5284	4	4
2-pyrrolidon	28.18	39.1541	3	4
butyricacid	2.98	4.5804	1	2
aceticacid	6.2	5.5058	2	2
1-butylamine	4.71	5.2959	2	2
n-propylamine	5.08	6.4899	2	2
acetonitrile	36.64	46.7373	4	4
dipropylamine	2.923	3.2884	1	1
1,3-butanediol	28.8	45.6069	3	4
1,3-propanediol	35.1	42.268	4	4
1,4-butadiol	31.9	40.9203	3	4
ethanolamine	31.94	27.1118	3	3
2-chloroethanol	25.8	24.9081	3	3
n-(2-aminoethyl)-1,2-ethanediamine	12.62	14.1269	3	3
3-chloro-1,2-propanediol	31	21.5822	3	3
2-ethyl-1,3-hexanediol	18.73	25.7066	3	3
diethyleneglycol	31.82	26.5694	3	3
1,5-pentanediol	26.2	19.807	3	3
ethoxyethanol	13.38	13.8461	3	3
2,2'-oxybis(2,1-ethanediyloxy)bisethanol	20.44	11.8625	3	3
2,2'-thiobisethanol	28.61	18.5712	3	3
triethyleneglycol	23.69	10.2608	3	3
1,2-diaminoethane	13.82	5.1094	3	2
propyleneglycol	27.5	20.0336	3	3
n,n'-bis(2-aminoethyl)-1,2-ethanediamine	10.76	7.6788	3	2
4-oh-4-me-2-pentanone	18.2	22.1476	3	3
(z,z)-9,12-octadecadienoicacid	2.754	2.6755	1	1
cis-9-octadecenoicacid	2.336	2.4461	1	1
n-heptanoicacid	3.04	3.3891	1	1
propionicacid	3.44	4.5933	1	2
n-hexanoicacid	2.6	3.3887	1	1
caprylicacid	2.85	3.0615	1	1
isobutyricacid	2.58	4.9498	1	2
n-bucooh	2.661	3.7875	1	2
nonanoicacid	2.4752	3.0512	1	1
trifluoroaceticacid	8.42	4.7315	2	2
dichloroaceticacid	8.33	3.1865	2	1
n-ethylaniline	5.87	8.4723	2	2
dibutylamine	2.765	3.1099	1	1
n-methylaniline	5.96	7.8378	2	2
chloroaceticacidmethylester	12	19.9092	3	3
2-propenenitrile	33	39.474	3	4
dimethylsulfoxide	47.24	41.019	4	4
nitromethane	37.27	49.9609	4	4
diethylamine	3.68	3.9581	2	2
furfural	42.12	53.833	4	4
piperidine	4.33	5.4086	2	2
cyclohexylamine	4.547	4.8122	2	2
cyanoaceticacidethylester	31.6	29.6531	3	3
pyrrole	8	10.5633	2	3
n-pentylamine	4.27	5.089	2	2
2-methyl-benzeneamine	6.138	6.9398	2	2
pyrrolidine	8.3	5.5263	2	2
2-chlorophenol	7.4	11.0895	2	3
3-methylaniline	5.816	5.3096	2	2
benzylamine	5.18	4.583	2	2
aniline	7.06	6.9302	2	2
morpholine	7.42	9.7002	2	2
4-ethoxybenzeneamine	7.43	8.1045	2	2
2,4-dimethylphenol	5.06	7.3097	2	2
isopropylamine	5.6268	6.3122	2	2
dodecanol	5.82	7.4249	2	2
2-methylphenol	6.76	8.5151	2	2
2-octanol	8.13	9.1314	2	2
1-nonanol	8.83	9.0524	2	2
tetrahydrofurfurylalcohol	13.48	23.7211	3	3
1-decanol	7.93	8.6898	2	2
3-hydroxytoluene	12.44	16.2724	3	3
1-octanol	10.3	10.3126	3	3
4-methylphenol	13.05	11.1349	3	3
ethylamine	8.7	8.3705	2	2
2-ethyl-1-butanol	6.19	12.0223	2	3
3-methyl-2-butanol	12.1	14.2216	3	3
phenyl-hydrazine	7.15	3.6208	2	2
2-methyl-2-butanol	5.78	13.3756	2	3
3-pentanol	13.35	13.5787	3	3
1-heptanol	11.75	11.1992	3	3
phenol	12.4	12.6785	3	3
cyclohexanol	16.4	14.2947	3	3
2-pentanol	13.71	13.9466	3	3
cyclopentanol	18.5	15.7205	3	3
2-phenylethanol	12.31	11.9274	3	3
aziridine	18.3	26.0307	3	3
tert-butanol	12.47	15.9947	3	3
2-methoxyethanol	17.2	16.4444	3	3
2-butanol	17.26	17.3846	3	3
benzylalcohol	11.916	13.8969	3	3
2-methyl-2,4-pentanediol	25.86	37.1377	3	4
isopentanol	15.63	15.5236	3	3
isobutanol	17.93	18.2784	3	3
2-furanmethanol	16.85	14.6858	3	3
2-propanol	20.18	22.1912	3	3
2-propen-1-ol	19.7	24.731	3	3
propynol	20.8	20.659	3	3
h2o2	74.6	47.4838	4	4
2-chloroaniline	13.4	7.2375	3	2
salicylicaldehyde	18.35	18.0952	3	3
2-hydroxy-benzoicacidmethylester	8.8	10.706	2	3
3-chlorobenzeneamine	13.3	15.7064	3	3
o-anisidine	5.23	6.6431	2	2
2-hydroxypropanoicacidethylester	15.4	14.6132	3	3
hexane	1.8865	2	1	1
tetrachloroethene	2.2683	2	1	1
cyclohexane	2.0243	2	1	1
octane	1.948	2	1	1
hexafluorobenzene	2.029	2	1	1
ccl4	2.2379	2	1	1
bbr3	2.58	2	1	1
n-decane	1.9853	2	1	1
trans-decalin	2.184	2	1	1
1,1,2,2-tetrachloro-1,2-difluoro-ethane	2.52	2	1	1
cs2	2.632	2	1	1
tetrachlorosilane	2.248	2	1	1
tetramethylsilane	1.921	2	1	1
benzene	2.2825	2	1	1
1,4-dimethylbenzene	2.2735	2	1	1
1,4-diethylbenzene	2.259	2	1	1
1,2-dibromo-1,1,2,2-tetrafluoroethane	2.34	2	1	1
trans-1,2-dichloroethene	2.14	2	1	1
br2	3.1484	2	1	1
dioxane	2.2189	2	1	1
dodecane	2.012	2	1	1
tetradecane	2.0343	2.0001	1	1
trimethylborate	2.276	2.0001	1	1
cyclopentane	1.9687	2.0003	1	1
1-methyl-4-isopropylbenzene	2.2322	2.0028	1	1
tetranitro-methane	2.317	2.0029	1	1
tridecane	2.0213	2.0042	1	1
n-undecane	1.9972	2.0047	1	1
2,2-dimethylbutane	1.869	2.0048	1	1
n-nonane	1.9722	2.0062	1	1
tributoxyborane	2.23	2.0455	1	1
n-heptane	1.9209	2.0078	1	1
1,3,5-trimethylbenzene	2.279	2.0092	1	1
cis-decalin	2.219	2.0104	1	1
pentane	1.8371	2.0106	1	1
2,2,4-trimethylpentane	1.943	2.0112	1	1
3-methylpentane	1.886	2.0139	1	1
methylcyclopentane	1.9853	2.0141	1	1
methylbutane	1.845	2.0148	1	1
2,3,3-trimethylpentane	1.978	2.015	1	1
methylcyclohexane	2.024	2.0191	1	1
2-methylpentane	1.886	2.0228	1	1
2,3-dimethylbutane	1.889	2.0272	1	1
bromotrichloromethane	2.405	2.0275	1	1
ethylsilicate	2.5	2.0569	1	1
styrene	2.4737	2.0609	1	1
dimethoxymethane	2.644	2.0982	1	1
1,2-dibromoethane	4.9612	2.2445	2	1
2-methyl-2-butene	1.979	2.1001	1	1
1,3-dimethylbenzene	2.359	2.1285	1	1
alpha-pinene	2.1787	2.1418	1	1
isoprene	2.098	2.1501	1	1
1-tridecene	2.139	2.1611	1	1
alpha-methylstyrene	2.28	2.1727	1	1
1,3-diethylbenzene	2.369	2.1756	1	1
1-methylnaphthalene	2.915	2.1784	1	1
isobutylbenzene	2.318	2.1826	1	1
1-dodecene	2.152	2.1841	1	1
cfcl3	3	2.185	1	1
1-decene	2.136	2.2183	1	1
n-propylbenzene	2.37	2.2234	1	1
isopropylbenzene	2.381	2.2265	1	1
(1,1-dimethylethyl)benzene	2.359	2.2269	1	1
ethylbenzene	2.4463	2.2365	1	1
1-nonene	2.18	2.2434	1	1
cyclohexene	2.2176	2.2438	1	1
1,2,4-trimethylbenzene	2.377	2.2443	1	1
butylbenzene	2.359	2.2451	1	1
myrcene	2.3	2.2661	1	1
decamethylcyclopentasiloxane	2.5	2.4431	1	1
octene	2.113	2.2723	1	1
toluene	2.379	2.2731	1	1
1-heptene	2.092	2.2849	1	1
1,1,2,3,4,4-hexachloro-1,3-butadiene	2.55	2.3014	1	1
tri-n-butylamine	2.34	2.3384	1	1
1-hexene	2.077	2.3444	1	1
pentene	2.011	2.3673	1	1
dibromodifluoromethane	2.939	2.4443	1	1
diethylcarbonate	2.82	2.7121	1	1
thiophene	2.739	2.4766	1	1
dipentene	2.3746	2.4819	1	1
1,2-diethylbenzene	2.594	2.5197	1	1
hexamethyldisiloxane	2.179	2.51	1	1
1-methyl-4-(1-methylethyl)-1,3-cyclohexadiene	2.4526	2.5401	1	1
triethylamine	2.418	2.6408	1	1
sulfurdichloride	2.915	2.6418	1	1
2-methyl-1-butene	2.18	2.7177	1	1
beta-pinene	2.497	2.7252	1	1
1,2-dimethylbenzene	2.562	2.7609	1	1
tetralin	2.771	2.8032	1	1
(z)-1,3-pentadiene	2.319	2.8624	1	1
1,2,3-trimethylbenzene	2.656	2.9501	1	1
dibenzylether	3.821	3.0241	2	1
di-n-pentylether	2.798	3.0292	1	1
diglyme	7.23	3.4084	2	1
2,5,8,11-tetraoxadodecane	7.62	3.2019	2	1
diisopentylether	2.817	3.1199	1	1
phosphorus-thiochloride	4.94	3.2387	2	1
pentachloroethane	3.716	3.391	2	1
trichloroethene	3.39	3.4079	1	1
di-n-butylether	3.083	3.4911	1	1
chbr3	4.404	3.5994	2	2
di-n-propylether	3.38	3.6289	1	2
pcl3	3.498	4.197	1	2
1,1,2,2-tetrabromoethane	6.72	4.4721	2	2
diisopropylether	3.805	4.6468	2	2
chcl3	4.8069	4.6962	2	2
3,6-dioxaoctane	3.9	4.5879	2	2
1,8-cineole	4.57	4.8486	2	2
diethylether	4.2666	4.8849	2	2
diiodomethane	5.32	4.9037	2	2
sulfurylchloride	9.1	5.0579	2	2
di-n-butylsulfide	4.29	5.2459	2	2
1-chloro-2-methylbenzene	4.721	5.2417	2	2
3-methylbutanoicacidethylester	4.71	5.2508	2	2
1,1,2,2-tetrachloroethane	8.5	5.6042	2	2
1-chloronaphthalene	5.04	5.4467	2	2
1,1,1,2-tetrachloroethane	9.22	5.5969	2	2
2,6-dimethylpyridine	7.33	5.7697	2	2
n-hexylacetate	4.42	5.8801	2	2
1,3-dichlorobenzene	5.02	5.8451	2	2
iodobenzene	4.59	5.9202	2	2
benzoicacidbutylester	5.523	5.9864	2	2
1,1-dichloroethylene	4.6	6.0545	2	2
fluorobenzene	5.465	6.0665	2	2
n-propylbutyrate	4.3	6.3164	2	2
thp	5.66	6.2768	2	2
1,2-dimethoxyethane	7.3	6.0641	2	2
n-pentylacetate	4.79	6.555	2	2
thionylchloride	8.675	6.6757	2	2
2-chloro-1,3-butadiene	4.914	6.693	2	2
ethylbenzoate	5.18	6.7442	2	2
1,1,2-trichloroethane	7.1937	7.8704	2	2
2,4-dichloro-1-methylbenzene	5.68	6.8362	2	2
bromobenzene	5.45	6.8858	2	2
chlorobenzene	5.6895	7.0406	2	2
diethylsulfide	5.723	7.0428	2	2
methylbenzoate	6.642	7.046	2	2
1-chlorooctane	5.05	7.211	2	2
ch2br2	7.77	7.3603	2	2
2,4,6-collidine	7.807	7.5564	2	2
n,n-dimethylaniline	4.9	7.9265	2	2
1,1,1-trichloroethane	7.243	7.9455	2	2
dimethylsulfide	6.7	8.2008	2	2
2-chloro-1-propene	8.92	8.4019	2	2
2,6-dimethyl-4-heptanone	9.91	8.8401	2	2
1-chloro-4-methylbenzene	6.25	8.8974	2	2
(chloromethyl)-benzene	6.854	8.9204	2	2
triethylphosphate	13.2	9.1354	3	2
1-chloropentane	6.654	9.2656	2	2
thf	7.52	9.3896	2	2
(dichloromethyl)-benzene	6.9	9.4693	2	2
ch2cl2	8.93	9.4911	2	2
1-bromopentane	6.31	9.5361	2	2
cis-1,2-dichloroethene	9.2	9.622	2	2
1-iodobutane	6.27	9.7453	2	2
1-chloro-2-methyl-propane	7.027	10.0199	2	3
1,2-dichloroethane	10.42	5.7009	3	2
trichloromethylsilane	10.21	10.1083	3	3
ch3i	6.97	10.3299	2	3
1-chlorobutane	7.276	10.6125	2	3
1-iodopropane	7.07	10.7028	2	3
1-bromobutane	7.315	10.8214	2	3
1,2-dichlorobenzene	10.12	11.1454	3	3
heptanal	9.07	11.1929	2	3
4-heptanone	12.6	11.3846	3	3
2-octanone	9.51	11.3763	2	3
1,1-dichloroethane	10.1	11.5041	3	3
chlorocyclohexane	7.9505	11.5361	2	3
3-bromopropene	7	11.5647	2	3
3-chloropropene	8.2	11.6727	2	3
2-chlorobutane	8.564	11.7486	2	3
1-chloropropane	8.588	11.8539	2	3
1-bromopropane	8.09	11.9188	2	3
3-heptanone	12.7	12.3288	3	3
iodoethane	7.82	12.3619	2	3
2-bromobutane	8.64	12.5203	2	3
trifluoromethylbenzene	9.22	12.5332	2	3
5-methyl-2-hexanone	13.53	12.7997	3	3
2-chloro-2-methylpropane	9.663	12.9176	2	3
2-iodopropane	8.19	13.3646	2	3
3,3-dimethyl-2-butanone	12.73	13.6335	3	3
ethyleneoxide	12.42	13.9468	3	3
bromoethane	9.01	14.0409	2	3
2-bromopropane	9.46	14.088	2	3
2-bromo-2-methylpropane	10.98	14.0888	3	3
2-hexanone	14.56	14.0988	3	3
chloroethane	9.45	14.1967	2	3
4-methylpyridine	12.2	15.473	3	3
3-pentanone	17	15.7319	3	3
butanal	13.45	15.968	3	3
3-methyl-2-butanone	10.37	15.9793	3	3
4-methyl-3-penten-2-one	15.6	17.5471	3	3
cyclopentanone	13.58	18.7977	3	3
hexamethylphosphoramide	31.3	18.749	3	3
cyclohexanone	16.1	19.0287	3	3
butanone	18.56	19.0942	3	3
propanal	18.517	20.2999	3	3
tetramethylurea	23.1	20.6674	3	3
acetaldehyde	21	26.3077	3	3
isocyanatomethane	21.75	27.0677	3	3
n-methyl-2-pyrrolidinone	32.55	30.2554	3	3
n,n-dimethylacetamide	38.85	30.878	4	3
ethylpropionate	5.76	7.3341	2	2
n,n-diethyl-benzeneamine	5.15	7.9249	2	2
ethylbutyrate	6.2	6.5128	2	2
sec-butylacetate	5.135	7.2534	2	2
1,3-dichloropropane	10.27	11.6013	3	3
n-butylacetate	5.07	7.001	2	2
methylbutyrate	5.48	6.1775	2	2
propylpropionate	5.249	7.14	2	2
n-propylacetate	5.62	7.8136	2	2
isoamylacetate	4.72	6.5629	2	2
aceticacid-2-methylpropylester	5.068	7.0521	2	2
methylpropionate	6.2	7.452	2	2
valeraldehyde	10	14.2971	2	3
ethylacetate	6.0814	8.5634	2	2
1,2,3-trichloropropane	7.5	7.9051	2	2
aceticacidphenylmethylester	5.34	6.6064	2	2
methylacetate	7.07	8.8658	2	2
1,2-dichloropropane	8.37	5.6159	2	2
2-heptanone	11.95	12.1438	3	3
2-ethoxyethanolacetate	7.567	9.9062	2	2
diethylsulfate	29.2	28.2413	3	3
2-pentanone	15.45	15.5987	3	3
4-methyl-2-pentanone	13.11	13.505	3	3
ethoxybenzene	4.216	4.7559	2	2
propanoicacid,anhydride	18.3	19.9747	3	3
trichloronitromethane	7.319	6.0031	2	2
anisole	4.3	4.735	2	2
2,4-diisocyanato-1-methylbenzene	8.433	9.2672	2	2
phosphoricacid-tris(2-methylphenyl)ester	6.7	3.9994	2	2
dimethyldisulfide	9.6	9.8213	2	2
trimethylphosphate	20.6	12.3488	3	3
butanoicacid,anhydride	12.8	15.3636	3	3
methylmethacrylate	6.32	7.8078	2	2
nicotine	8.937	7.7724	2	2
carbonochloridicacidethylester	9.736	19.4266	2	3
benzoylchloride	23	25.4712	3	3
ethylsuccinate	6.098	4.0578	2	2
acetophenone	17.44	16.6894	3	3
2-propenoicacidbutylester	5.25	5.9559	2	2
isoquinoline	11	11.9623	3	3
chinoline	9.16	8.8767	2	2
2-methyl-propanenitrile	24.42	30.835	3	3
3-picoline	11.1	13.3629	3	3
2-nitropropane	26.74	25.0006	3	3
diethylphthalate	7.86	6.8593	2	2
dibutylphthalate	6.58	6.7987	2	2
2-methylpyridine	10.18	8.6785	3	2
2-propenoicacidethylester	6.05	7.1107	2	2
benzaldehyde	17.85	21.0957	3	3
1,2,3-propanetrioltrinitrate	19.25	12.185	3	3
gamma-butyrolactone	39	44.3079	4	4
2-nitrotoluene	26.26	26.0907	3	3
3-nitrotoluene	24.95	33.024	3	3
acetylchloride	15.8	21.0195	3	3
1,2-ethanedioldiacetate	7.7	5.6399	2	2
benzenemethanethiol	4.705	4.9287	2	2
methylacrylate	7.03	6.4511	2	2
2-butanethiol	5.645	7.1173	2	2
1-pentanethiol	4.847	6.1872	2	2
thiophenol	4.26	3.9583	2	2
dimethylphthalate	8.66	6.3048	2	2
bis(2-chloroethyl)ether	21.2	15.4254	3	3
glycerol-tributyrate	5.72	5.1245	2	2
tert-butylthiol	5.475	7.2703	2	2
pyridine	13.26	12.9365	3	3
butanethiol	5.204	6.9402	2	2
4-methoxybenzaldehyde	22.03	38.3836	3	4
nitrobenzene	35.6	33.0429	4	3
dimethylsulfate	55	30.0239	4	3
1,2-ethanedioldinitrate	28.26	17.5455	3	3
furane	2.94	2.9428	1	1
3-phenyl-2-propenal	17.72	31.9228	3	3
butyronitrile	24.83	31.1416	3	3
1-methoxy-2-nitrobenzene	45.75	42.1954	4	4
aceticanhydride	22.45	25.8398	3	3
ethyloxalat	8.266	2.1647	2	1
acetylacetone	26.524	14.2576	3	3
ethanethiol	6.667	8.8737	2	2
benzonitrile	25.9	32.9241	3	3
glycerol-triacetate	7.11	6.8172	2	2
trichloroacetaldehyde	6.8	6.4161	2	2
(chloromethyl)-oxirane	22.6	16.4069	3	3
chloromethoxymethane	24.9	17.9289	3	3
oxybischloromethane	3.51	3.3164	2	1
propionitrile	29.7	37.5899	3	4
isobutylformate	6.41	10.8962	2	3
butadione	4.04	2.0365	2	1
1,2-ethanedithiol	7.26	2.6124	2	1
1-nitropropane	24.7	28.4019	3	3
pocl3	14.1	9.3309	3	2
diethylmalonate	7.55	8.4514	2	2
ethylacetoacetate	14	12.9471	3	3
n-propylformate	6.92	11.6657	2	3
propylenecarbonate	66.14	58.4751	4	4
diethylmaleate	7.56	8.829	2	2
phenylacetonitrile	17.87	20.5531	3	3
ethylformate	8.57	14.2836	2	3
nitroethane	29.11	34.3416	3	3
triolein	3.109	2.7782	1	1
decanedioicaciddibutylester	4.54	2.0796	2	1

## Sheet: organicMixtures
compound 1	compound 2	mole fraction of compound 1	mole fraction of compound 2	εr,exp	εr,calc	Griffith's class (exp)	Griffith's class (calc)
ccl4	trans-2-hexenal	1	0	2.2682	2.0002	1	1
ccl4	trans-2-hexenal	0.99	0.01	2.331	2.0014	1	1
ccl4	trans-2-hexenal	0.99	0.01	2.4007	2.0037	1	1
ccl4	trans-2-hexenal	0.98	0.02	2.5157	2.0101	1	1
ccl4	trans-2-hexenal	0.98	0.02	2.5811	2.0159	1	1
ccl4	trans-2-hexenal	0.97	0.03	2.6684	2.0246	1	1
ccl4	trans-2-hexenal	0.96	0.04	2.7787	2.0387	1	1
ccl4	trans-2-hexenal	0.96	0.04	2.9167	2.0604	1	1
ccl4	trans-2-hexenal	0.94	0.06	3.0914	2.0945	1	1
ccl4	trans-2-hexenal	0.91	0.09	3.6893	2.2641	2	1
ccl4	cis-3-hexen-1-ol	0.99	0.01	2.2541	2.0003	1	1
ccl4	cis-3-hexen-1-ol	0.98	0.02	2.2972	2.0022	1	1
ccl4	cis-3-hexen-1-ol	0.97	0.03	2.341	2.006	1	1
ccl4	cis-3-hexen-1-ol	0.94	0.06	2.4092	2.0174	1	1
ccl4	cis-3-hexen-1-ol	0.9	0.1	2.5296	2.0507	1	1
ccl4	cis-3-hexen-1-ol	0.88	0.12	2.615	2.0817	1	1
ccl4	cis-3-hexen-1-ol	0.85	0.15	2.7337	2.1322	1	1
ccl4	cis-3-hexen-1-ol	0.81	0.19	2.9048	2.2157	1	1
ccl4	cis-3-hexen-1-ol	0.76	0.24	3.1663	2.355	1	1
ccl4	cis-3-hexen-1-ol	0.69	0.31	3.5968	2.5937	2	1
ccl4	2-aminobenzoicacidmethylester	0.98	0.02	2.2577	2.0003	1	1
ccl4	2-aminobenzoicacidmethylester	0.96	0.04	2.3087	2.0015	1	1
ccl4	2-aminobenzoicacidmethylester	0.93	0.07	2.3667	2.0043	1	1
ccl4	2-aminobenzoicacidmethylester	0.88	0.12	2.4722	2.012	1	1
ccl4	2-aminobenzoicacidmethylester	0.85	0.15	2.5447	2.019	1	1
ccl4	2-aminobenzoicacidmethylester	0.81	0.19	2.6376	2.0301	1	1
ccl4	2-aminobenzoicacidmethylester	0.76	0.24	2.7618	2.0481	1	1
ccl4	2-aminobenzoicacidmethylester	0.7	0.3	2.9239	2.0775	1	1
ccl4	2-aminobenzoicacidmethylester	0.62	0.38	3.1461	2.1262	1	1
ccl4	2-aminobenzoicacidmethylester	0.51	0.49	3.4345	2.2089	1	1
ccl4	1-butanol-3-methylpropanoate	0.99	0.01	2.2761	2.001	1	1
ccl4	1-butanol-3-methylpropanoate	0.97	0.03	2.3514	2.0058	1	1
ccl4	1-butanol-3-methylpropanoate	0.95	0.05	2.4337	2.0164	1	1
ccl4	1-butanol-3-methylpropanoate	0.91	0.09	2.5717	2.0465	1	1
ccl4	1-butanol-3-methylpropanoate	0.89	0.11	2.6573	2.0738	1	1
ccl4	1-butanol-3-methylpropanoate	0.86	0.14	2.7634	2.1178	1	1
ccl4	1-butanol-3-methylpropanoate	0.82	0.18	2.8987	2.1889	1	1
ccl4	1-butanol-3-methylpropanoate	0.77	0.23	3.0647	2.3057	1	1
ccl4	1-butanol-3-methylpropanoate	0.7	0.3	3.2722	2.5001	1	1
ccl4	1-butanol-3-methylpropanoate	0.61	0.39	3.529	2.8302	2	1
ccl4	trans-anethole	0.99	0.01	2.2668	2.0004	1	1
ccl4	trans-anethole	0.97	0.03	2.329	2.0025	1	1
ccl4	trans-anethole	0.94	0.06	2.396	2.0069	1	1
ccl4	trans-anethole	0.9	0.1	2.5077	2.0195	1	1
ccl4	trans-anethole	0.88	0.12	2.5792	2.0308	1	1
ccl4	trans-anethole	0.84	0.16	2.668	2.0488	1	1
ccl4	trans-anethole	0.8	0.2	2.7807	2.0777	1	1
ccl4	trans-anethole	0.74	0.26	2.9231	2.1243	1	1
ccl4	trans-anethole	0.66	0.34	3.1054	2.2006	1	1
ccl4	trans-anethole	0.56	0.44	3.3273	2.3264	1	1
ch2cl2	ethanol	1	0	8.51	9.4911	2	2
ch2cl2	ethanol	0.89	0.11	10.82	10.3103	3	3
ch2cl2	ethanol	0.78	0.22	13.18	11.4993	3	3
ch2cl2	ethanol	0.68	0.32	15.86	13.038	3	3
ch2cl2	ethanol	0.58	0.42	18.31	14.9793	3	3
ch2cl2	ethanol	0.48	0.52	20.09	17.3401	3	3
ch2cl2	ethanol	0.38	0.62	21.67	20.0991	3	3
ch2cl2	ethanol	0.28	0.72	22.77	23.1726	3	3
ch2cl2	ethanol	0.19	0.81	23.55	26.2704	3	3
ch2cl2	ethanol	0.09	0.91	24.07	28.9937	3	3
ch2cl2	ethanol	0	1	24.45	30.5715	3	3
ch2cl2	propanol	1	0	8.51	9.4911	2	2
ch2cl2	propanol	0.91	0.09	9.1	9.8931	2	2
ch2cl2	propanol	0.82	0.18	10.2	10.4844	3	3
ch2cl2	propanol	0.73	0.27	11.8	11.2927	3	3
ch2cl2	propanol	0.64	0.36	13.7	12.3522	3	3
ch2cl2	propanol	0.54	0.46	15.8	13.7105	3	3
ch2cl2	propanol	0.44	0.56	17.8	15.3764	3	3
ch2cl2	propanol	0.33	0.67	19.1	17.354	3	3
ch2cl2	propanol	0.23	0.77	19.8	19.5611	3	3
ch2cl2	propanol	0.11	0.89	20.2	21.6972	3	3
ch2cl2	propanol	0	1	20.73	23.2757	3	3
formamide	glycerol	1	0	78.39	106.807	4	4
formamide	glycerol	0.8	0.2	63.79	93.0169	4	4
formamide	glycerol	0.6	0.4	55.26	78.5717	4	4
formamide	glycerol	0.4	0.6	49.52	64.1269	4	4
formamide	glycerol	0.2	0.8	45.48	50.4733	4	4
formamide	glycerol	0	1	42.49	38.4446	4	4
formamide	dioxane	1	0	109.5	106.486	4	4
formamide	dioxane	0.95	0.05	96.38	88.0014	4	4
formamide	dioxane	0.9	0.1	83.76	71.1174	4	4
formamide	dioxane	0.83	0.17	70.62	55.7569	4	4
formamide	dioxane	0.76	0.24	58.01	42.1091	4	4
formamide	dioxane	0.68	0.32	46.22	30.2868	4	3
formamide	dioxane	0.59	0.41	35.44	20.3709	4	3
formamide	dioxane	0.48	0.52	24.11	12.5437	3	3
formamide	dioxane	0.35	0.65	14.61	6.8257	3	2
formamide	dioxane	0.19	0.81	7.34	3.2708	2	1
formamide	dioxane	0	1	2.21	2	1	1
formamide	pyridine	1	0	103.3	106.112	4	4
formamide	pyridine	0.9	0.1	91.1	82.5488	4	4
formamide	pyridine	0.8	0.2	83.9	64.7189	4	4
formamide	pyridine	0.7	0.3	77.5	51.1353	4	4
formamide	pyridine	0.6	0.4	65.4	40.712	4	4
formamide	pyridine	0.5	0.5	52.4	32.706	4	3
formamide	pyridine	0.4	0.6	44.9	26.5157	4	3
formamide	pyridine	0.3	0.7	36.2	21.6983	4	3
formamide	pyridine	0.2	0.8	30.6	17.9712	3	3
formamide	pyridine	0.1	0.9	25.5	15.1319	3	3
formamide	pyridine	0	1	12	12.9365	3	3
nitromethane	acetonitrile	0	1	36.05	46.7373	4	4
nitromethane	acetonitrile	0.07	0.93	36.03	47.1535	4	4
nitromethane	acetonitrile	0.22	0.78	36.03	48.1469	4	4
nitromethane	acetonitrile	0.4	0.6	36.14	49.0926	4	4
nitromethane	acetonitrile	0.61	0.39	36.29	49.7866	4	4
nitromethane	acetonitrile	0.86	0.14	36.4	49.9959	4	4
nitromethane	acetonitrile	1	0	36.48	49.9651	4	4
methanol	acetonitrile	1	0	32.6	39.6427	3	4
methanol	acetonitrile	0.95	0.05	33.1	41.2757	3	4
methanol	acetonitrile	0.89	0.11	33.4	42.7167	3	4
methanol	acetonitrile	0.8	0.2	33.9	44.7716	3	4
methanol	acetonitrile	0.66	0.34	34.5	46.7751	3	4
methanol	acetonitrile	0.53	0.47	34.9	47.8882	3	4
methanol	acetonitrile	0.39	0.61	35.3	48.7188	4	4
methanol	acetonitrile	0.24	0.76	35.6	48.6378	4	4
methanol	acetonitrile	0.01	0.99	35.9	46.9713	4	4
methanol	acetonitrile	0	1	36	46.7373	4	4
methanol	gamma-butyrolactone	1	0	32.64	39.8448	3	4
methanol	gamma-butyrolactone	0.9	0.1	35.33	41.3314	4	4
methanol	gamma-butyrolactone	0.8	0.2	36.71	41.6844	4	4
methanol	gamma-butyrolactone	0.7	0.3	37.91	41.5852	4	4
methanol	gamma-butyrolactone	0.6	0.4	38.95	41.6942	4	4
methanol	gamma-butyrolactone	0.5	0.5	39.71	41.6337	4	4
methanol	gamma-butyrolactone	0.4	0.6	40.36	41.7775	4	4
methanol	gamma-butyrolactone	0.3	0.7	40.89	42.1427	4	4
methanol	gamma-butyrolactone	0.2	0.8	41.24	42.7777	4	4
methanol	gamma-butyrolactone	0.1	0.9	41.43	43.5109	4	4
methanol	gamma-butyrolactone	0	1	41.68	44.3079	4	4
methanol	butyronitrile	1	0	33	39.6368	3	4
methanol	butyronitrile	0.9	0.1	31.9	40.2243	3	4
methanol	butyronitrile	0.8	0.2	31.6	39.9824	3	4
methanol	butyronitrile	0.5	0.5	29.2	37.5156	3	4
methanol	butyronitrile	0.2	0.8	25.9	33.996	3	3
methanol	butyronitrile	0.1	0.9	25.4	32.663	3	3
methanol	butyronitrile	0	1	22	31.1416	3	3
methanol	thf	1	0	32.63	39.3997	3	4
methanol	thf	0.96	0.04	30.41	36.7898	3	4
methanol	thf	0.95	0.05	30.06	36.3773	3	4
methanol	thf	0.94	0.06	29.21	35.365	3	4
methanol	thf	0.9	0.1	27.52	33.3157	3	3
methanol	thf	0.84	0.16	24.92	30.131	3	3
methanol	thf	0.77	0.23	22.31	26.9099	3	3
methanol	thf	0.69	0.31	19.73	23.7858	3	3
methanol	thf	0.6	0.4	17.18	20.8214	3	3
methanol	thf	0.49	0.51	14.4	17.6526	3	3
methanol	thf	0.35	0.65	11.57	14.4248	3	3
methanol	thf	0.19	0.81	9.43	11.7983	2	3
methanol	thf	0	1	7.36	9.3896	2	2
methanol	n,n-dimethylacetamide	1	0	32.64	39.3932	3	4
methanol	n,n-dimethylacetamide	0.9	0.1	33.8	43.6086	3	4
methanol	n,n-dimethylacetamide	0.8	0.2	35.1	43.7094	4	4
methanol	n,n-dimethylacetamide	0.7	0.3	35.68	42.1323	4	4
methanol	n,n-dimethylacetamide	0.6	0.4	36.26	39.9102	4	4
methanol	n,n-dimethylacetamide	0.5	0.5	36.6	37.8332	4	4
methanol	n,n-dimethylacetamide	0.4	0.6	36.86	35.8009	4	4
methanol	n,n-dimethylacetamide	0.3	0.7	37.1	34.1016	4	3
methanol	n,n-dimethylacetamide	0.2	0.8	37.35	32.7684	4	3
methanol	n,n-dimethylacetamide	0.1	0.9	37.59	31.6765	4	3
methanol	n,n-dimethylacetamide	0	1	37.75	30.878	4	3
methanol	pyridine	1	0	32.05	39.0642	3	4
methanol	pyridine	0.9	0.1	28.87	29.1298	3	3
methanol	pyridine	0.8	0.2	27.45	23.0447	3	3
methanol	pyridine	0.7	0.3	26.63	19.0852	3	3
methanol	pyridine	0.6	0.4	25.27	16.5587	3	3
methanol	pyridine	0.5	0.5	23.33	14.9107	3	3
methanol	pyridine	0.4	0.6	21.31	13.8627	3	3
methanol	pyridine	0.3	0.7	19.78	13.2304	3	3
methanol	pyridine	0.2	0.8	17.41	12.9442	3	3
methanol	pyridine	0.1	0.9	15.14	12.8753	3	3
methanol	pyridine	0	1	12.02	12.9365	3	3
methanol	valeronitrile	1	0	33	39.6357	3	4
methanol	valeronitrile	0.9	0.1	32	38.9187	3	4
methanol	valeronitrile	0.8	0.2	31	37.7206	3	4
methanol	valeronitrile	0.5	0.5	27.6	33.7829	3	3
methanol	valeronitrile	0.2	0.8	23.8	29.8742	3	3
methanol	valeronitrile	0.1	0.9	22.5	28.5353	3	3
methanol	valeronitrile	0	1	21	27.093	3	3
methanol	hexanenitrile	1	0	33	39.8321	3	4
methanol	hexanenitrile	0.9	0.1	31.4	37.4346	3	4
methanol	hexanenitrile	0.8	0.2	29.3	35.1346	3	4
methanol	hexanenitrile	0.49	0.51	24.3	29.6001	3	3
methanol	hexanenitrile	0.2	0.8	19.1	25.5949	3	3
methanol	hexanenitrile	0.1	0.9	17.6	24.3672	3	3
methanol	hexanenitrile	0	1	16.3	23.107	3	3
methanol	octanenitrile	1	0	33	39.6371	3	4
methanol	octanenitrile	0.9	0.1	30.9	34.7993	3	3
methanol	octanenitrile	0.79	0.21	28.4	31.1607	3	3
methanol	octanenitrile	0.49	0.51	21.6	24.5162	3	3
methanol	octanenitrile	0.19	0.81	15.7	20.6823	3	3
methanol	octanenitrile	0.1	0.9	14	19.5841	3	3
methanol	octanenitrile	0	1	13	18.5127	3	3
methanol	caprinitrile	1	0	33	39.6359	3	4
methanol	caprinitrile	0.79	0.21	28.1	27.8255	3	3
methanol	caprinitrile	0.49	0.51	20	21.0044	3	3
methanol	caprinitrile	0.19	0.81	13.9	17.3542	3	3
methanol	caprinitrile	0	1	10.6	15.4351	3	3
acetonitrile	ethanol	1	0	36	46.7373	4	4
acetonitrile	ethanol	0.96	0.04	35.4	46.5218	4	4
acetonitrile	ethanol	0.91	0.09	34.8	46.0302	3	4
acetonitrile	ethanol	0.85	0.15	33.9	45.2377	3	4
acetonitrile	ethanol	0.81	0.19	33.2	44.6561	3	4
acetonitrile	ethanol	0.75	0.25	32.5	43.6642	3	4
acetonitrile	ethanol	0.65	0.35	31.3	42.0548	3	4
acetonitrile	propanol	1	0	35.97	46.7373	4	4
acetonitrile	propanol	0.95	0.05	34.7	45.6485	3	4
acetonitrile	propanol	0.9	0.1	33.48	44.3173	3	4
acetonitrile	propanol	0.85	0.15	32.32	42.9273	3	4
acetonitrile	propanol	0.8	0.2	31.21	41.5252	3	4
acetonitrile	propanol	0.75	0.25	30.16	40.129	3	4
acetonitrile	propanol	0.7	0.3	29.17	38.6264	3	4
acetonitrile	propanol	0.65	0.35	28.23	37.2429	3	4
acetonitrile	propanol	0.6	0.4	27.35	35.8834	3	4
acetonitrile	propanol	0.55	0.45	26.53	34.5505	3	3
acetonitrile	propanol	0.5	0.5	25.76	33.2466	3	3
acetonitrile	propanol	0.45	0.55	25.05	31.9747	3	3
acetonitrile	propanol	0.4	0.6	24.38	30.7389	3	3
acetonitrile	propanol	0.35	0.65	23.77	29.544	3	3
acetonitrile	propanol	0.3	0.7	23.2	28.3968	3	3
acetonitrile	propanol	0.25	0.75	22.67	27.3059	3	3
acetonitrile	propanol	0.2	0.8	22.18	26.2828	3	3
acetonitrile	propanol	0.15	0.85	21.72	25.3425	3	3
acetonitrile	propanol	0.1	0.9	21.29	24.5053	3	3
acetonitrile	propanol	0.05	0.95	20.88	23.7994	3	3
acetonitrile	propanol	0	1	20.49	23.2643	3	3
acetonitrile	2-propanol	1	0	35.97	46.7373	4	4
acetonitrile	2-propanol	0.95	0.05	34.59	45.4201	3	4
acetonitrile	2-propanol	0.9	0.1	33.26	43.8964	3	4
acetonitrile	2-propanol	0.85	0.15	32	42.3504	3	4
acetonitrile	2-propanol	0.8	0.2	30.81	40.8126	3	4
acetonitrile	2-propanol	0.75	0.25	29.67	39.2983	3	4
acetonitrile	2-propanol	0.7	0.3	28.6	37.8141	3	4
acetonitrile	2-propanol	0.65	0.35	27.59	36.3634	3	4
acetonitrile	2-propanol	0.6	0.4	26.64	34.948	3	3
acetonitrile	2-propanol	0.55	0.45	25.75	33.4379	3	3
acetonitrile	2-propanol	0.5	0.5	24.91	32.0871	3	3
acetonitrile	2-propanol	0.45	0.55	24.14	30.7797	3	3
acetonitrile	2-propanol	0.4	0.6	23.41	29.5191	3	3
acetonitrile	2-propanol	0.35	0.65	22.75	28.3101	3	3
acetonitrile	2-propanol	0.3	0.7	22.13	27.1587	3	3
acetonitrile	2-propanol	0.25	0.75	21.57	26.0732	3	3
acetonitrile	2-propanol	0.2	0.8	21.05	25.0642	3	3
acetonitrile	2-propanol	0.15	0.85	20.59	24.1462	3	3
acetonitrile	2-propanol	0.1	0.9	20.16	23.3384	3	3
acetonitrile	2-propanol	0.05	0.95	19.78	22.6677	3	3
acetonitrile	2-propanol	0	1	19.45	22.1724	3	3
acetonitrile	2-methoxyethanol	1	0	35.97	46.7373	4	4
acetonitrile	2-methoxyethanol	0.95	0.05	34.86	44.2892	3	4
acetonitrile	2-methoxyethanol	0.9	0.1	33.86	41.9574	3	4
acetonitrile	2-methoxyethanol	0.85	0.15	32.74	39.5237	3	4
acetonitrile	2-methoxyethanol	0.8	0.2	31.71	37.337	3	4
acetonitrile	2-methoxyethanol	0.75	0.25	30.8	35.4963	3	4
acetonitrile	2-methoxyethanol	0.69	0.31	29.64	33.1881	3	3
acetonitrile	2-methoxyethanol	0.65	0.35	28.77	31.5892	3	3
acetonitrile	2-methoxyethanol	0.6	0.4	27.82	29.9457	3	3
acetonitrile	2-methoxyethanol	0.54	0.46	26.68	28.0362	3	3
acetonitrile	2-methoxyethanol	0.5	0.5	25.8	26.6581	3	3
acetonitrile	2-methoxyethanol	0.45	0.55	24.83	25.1751	3	3
acetonitrile	2-methoxyethanol	0.4	0.6	23.98	23.9473	3	3
acetonitrile	2-methoxyethanol	0.35	0.65	23.06	22.6007	3	3
acetonitrile	2-methoxyethanol	0.3	0.7	22.24	21.5127	3	3
acetonitrile	2-methoxyethanol	0.25	0.75	21.26	20.3223	3	3
acetonitrile	2-methoxyethanol	0.2	0.8	20.44	19.4246	3	3
acetonitrile	2-methoxyethanol	0.15	0.85	19.67	18.6223	3	3
acetonitrile	2-methoxyethanol	0.1	0.9	18.66	17.7129	3	3
acetonitrile	2-methoxyethanol	0.05	0.95	17.92	17.1022	3	3
acetonitrile	2-methoxyethanol	0	1	16.95	16.4411	3	3
acetonitrile	propylenecarbonate	1	0	35.99	46.7373	4	4
acetonitrile	propylenecarbonate	0.96	0.04	37.32	47.1418	4	4
acetonitrile	propylenecarbonate	0.91	0.09	39.89	47.6159	4	4
acetonitrile	propylenecarbonate	0.86	0.14	42.05	48.1801	4	4
acetonitrile	propylenecarbonate	0.79	0.21	44	48.8558	4	4
acetonitrile	propylenecarbonate	0.72	0.28	47.048	49.6756	4	4
acetonitrile	propylenecarbonate	0.63	0.37	49.9	50.6831	4	4
acetonitrile	propylenecarbonate	0.52	0.48	53.03	51.9438	4	4
acetonitrile	propylenecarbonate	0.39	0.61	56.63	53.5487	4	4
acetonitrile	propylenecarbonate	0.22	0.78	60.67	55.648	4	4
acetonitrile	propylenecarbonate	0	1	65.16	58.4751	4	4
acetonitrile	1-butanol	1	0	35.97	46.7373	4	4
acetonitrile	1-butanol	0.95	0.05	33.94	44.9101	3	4
acetonitrile	1-butanol	0.9	0.1	32.11	42.9156	3	4
acetonitrile	1-butanol	0.85	0.15	30.45	40.9375	3	4
acetonitrile	1-butanol	0.8	0.2	28.97	39.0174	3	4
acetonitrile	1-butanol	0.75	0.25	27.65	37.1679	3	4
acetonitrile	1-butanol	0.7	0.3	26.47	35.2942	3	4
acetonitrile	1-butanol	0.65	0.35	25.42	33.576	3	3
acetonitrile	1-butanol	0.6	0.4	24.49	31.931	3	3
acetonitrile	1-butanol	0.55	0.45	23.66	30.3573	3	3
acetonitrile	1-butanol	0.5	0.5	22.92	28.8536	3	3
acetonitrile	1-butanol	0.45	0.55	22.26	27.4195	3	3
acetonitrile	1-butanol	0.4	0.6	21.66	26.0558	3	3
acetonitrile	1-butanol	0.35	0.65	21.11	24.7649	3	3
acetonitrile	1-butanol	0.3	0.7	20.6	23.5509	3	3
acetonitrile	1-butanol	0.25	0.75	20.12	22.4205	3	3
acetonitrile	1-butanol	0.2	0.8	19.65	21.3833	3	3
acetonitrile	1-butanol	0.15	0.85	19.17	20.4535	3	3
acetonitrile	1-butanol	0.1	0.9	18.68	19.6518	3	3
acetonitrile	1-butanol	0.05	0.95	18.16	19.0091	3	3
acetonitrile	1-butanol	0	1	17.56	18.5731	3	3
acetonitrile	2-butanol	1	0	35.97	46.7373	4	4
acetonitrile	2-butanol	0.95	0.05	34.01	44.7613	3	4
acetonitrile	2-butanol	0.9	0.1	32.2	42.6511	3	4
acetonitrile	2-butanol	0.85	0.15	30.5	40.5788	3	4
acetonitrile	2-butanol	0.8	0.2	28.93	38.574	3	4
acetonitrile	2-butanol	0.75	0.25	27.47	36.6478	3	4
acetonitrile	2-butanol	0.7	0.3	26.13	34.8021	3	3
acetonitrile	2-butanol	0.65	0.35	24.89	33.0356	3	3
acetonitrile	2-butanol	0.6	0.4	23.76	31.346	3	3
acetonitrile	2-butanol	0.55	0.45	22.72	29.7309	3	3
acetonitrile	2-butanol	0.5	0.5	21.78	28.1886	3	3
acetonitrile	2-butanol	0.45	0.55	20.93	26.7182	3	3
acetonitrile	2-butanol	0.4	0.6	20.17	25.2072	3	3
acetonitrile	2-butanol	0.35	0.65	19.48	23.8808	3	3
acetonitrile	2-butanol	0.3	0.7	18.88	22.633	3	3
acetonitrile	2-butanol	0.25	0.75	18.34	21.4694	3	3
acetonitrile	2-butanol	0.2	0.8	17.87	20.3978	3	3
acetonitrile	2-butanol	0.15	0.85	17.46	19.4305	3	3
acetonitrile	2-butanol	0.1	0.9	17.11	18.5848	3	3
acetonitrile	2-butanol	0.05	0.95	16.82	17.887	3	3
acetonitrile	2-butanol	0	1	16.58	17.3779	3	3
acetonitrile	isobutanol	1	0	35.97	46.7373	4	4
acetonitrile	isobutanol	0.95	0.05	33.98	45.0368	3	4
acetonitrile	isobutanol	0.9	0.1	32.17	43.1992	3	4
acetonitrile	isobutanol	0.85	0.15	30.54	41.3745	3	4
acetonitrile	isobutanol	0.8	0.2	29.06	39.5121	3	4
acetonitrile	isobutanol	0.75	0.25	27.74	37.7332	3	4
acetonitrile	isobutanol	0.7	0.3	26.55	35.9278	3	4
acetonitrile	isobutanol	0.65	0.35	25.49	34.2514	3	3
acetonitrile	isobutanol	0.6	0.4	24.54	32.4999	3	3
acetonitrile	isobutanol	0.55	0.45	23.7	30.9666	3	3
acetonitrile	isobutanol	0.5	0.5	22.95	29.3993	3	3
acetonitrile	isobutanol	0.45	0.55	22.28	27.9155	3	3
acetonitrile	isobutanol	0.4	0.6	21.68	26.4944	3	3
acetonitrile	isobutanol	0.35	0.65	21.13	25.1941	3	3
acetonitrile	isobutanol	0.3	0.7	20.63	23.8653	3	3
acetonitrile	isobutanol	0.25	0.75	20.16	22.6947	3	3
acetonitrile	isobutanol	0.2	0.8	19.72	21.5303	3	3
acetonitrile	isobutanol	0.15	0.85	19.28	20.4934	3	3
acetonitrile	isobutanol	0.1	0.9	18.85	19.5888	3	3
acetonitrile	isobutanol	0.05	0.95	18.4	18.8504	3	3
acetonitrile	isobutanol	0	1	17.93	18.2697	3	3
acetonitrile	tert-butanol	1	0	35.97	46.7373	4	4
acetonitrile	tert-butanol	0.95	0.05	33.81	44.469	3	4
acetonitrile	tert-butanol	0.9	0.1	31.8	42.1262	3	4
acetonitrile	tert-butanol	0.85	0.15	29.92	39.8826	3	4
acetonitrile	tert-butanol	0.8	0.2	28.19	37.7774	3	4
acetonitrile	tert-butanol	0.75	0.25	26.58	35.7798	3	4
acetonitrile	tert-butanol	0.7	0.3	25.09	33.8515	3	3
acetonitrile	tert-butanol	0.65	0.35	23.71	31.9915	3	3
acetonitrile	tert-butanol	0.6	0.4	22.44	30.2693	3	3
acetonitrile	tert-butanol	0.55	0.45	21.26	28.6475	3	3
acetonitrile	tert-butanol	0.5	0.5	20.17	27.0278	3	3
acetonitrile	tert-butanol	0.45	0.55	19.15	25.5326	3	3
acetonitrile	tert-butanol	0.4	0.6	18.21	24.1399	3	3
acetonitrile	tert-butanol	0.35	0.65	17.33	22.8041	3	3
acetonitrile	tert-butanol	0.3	0.7	16.51	21.542	3	3
acetonitrile	tert-butanol	0.25	0.75	15.74	20.3626	3	3
acetonitrile	tert-butanol	0.2	0.8	15	19.212	3	3
acetonitrile	tert-butanol	0.15	0.85	14.3	18.2225	3	3
acetonitrile	tert-butanol	0.1	0.9	13.62	17.3237	3	3
acetonitrile	tert-butanol	0.05	0.95	12.97	16.5706	3	3
acetonitrile	benzene	1	0	36	46.7373	4	4
acetonitrile	benzene	0.96	0.04	34.3	41.8593	3	4
acetonitrile	benzene	0.91	0.09	31.6	37.0042	3	4
acetonitrile	benzene	0.85	0.15	27.9	31.2758	3	3
acetonitrile	benzene	0.81	0.19	26	27.8379	3	3
acetonitrile	benzene	0.75	0.25	23.5	23.4856	3	3
acetonitrile	benzene	0.65	0.35	19.4	17.3383	3	3
1,2-dichloroethane	ethanol	1	0	10.43	5.7013	3	2
1,2-dichloroethane	ethanol	0.87	0.13	12	6.7049	3	2
1,2-dichloroethane	ethanol	0.75	0.25	13.7	7.993	3	2
1,2-dichloroethane	ethanol	0.63	0.37	16.1	9.6292	3	2
1,2-dichloroethane	ethanol	0.52	0.48	17.6	11.4313	3	3
1,2-dichloroethane	ethanol	0.42	0.58	19.1	13.6519	3	3
1,2-dichloroethane	ethanol	0.33	0.67	20.6	16.2378	3	3
1,2-dichloroethane	ethanol	0.24	0.76	21.8	19.2261	3	3
1,2-dichloroethane	ethanol	0.15	0.85	22.8	22.6372	3	3
1,2-dichloroethane	ethanol	0.08	0.92	23.7	26.4815	3	3
1,2-dichloroethane	ethanol	0	1	24.45	30.753	3	3
1,2-dichloroethane	dimethylformamide	0	1	37.59	37.7835	4	4
1,2-dichloroethane	dimethylformamide	0.1	0.9	35.26	34.1488	4	3
1,2-dichloroethane	dimethylformamide	0.2	0.8	33.25	30.6548	3	3
1,2-dichloroethane	dimethylformamide	0.29	0.71	30.93	27.0565	3	3
1,2-dichloroethane	dimethylformamide	0.39	0.61	28.6	23.5349	3	3
1,2-dichloroethane	dimethylformamide	0.49	0.51	25.96	20.0843	3	3
1,2-dichloroethane	dimethylformamide	0.59	0.41	22.96	16.5498	3	3
1,2-dichloroethane	dimethylformamide	0.7	0.3	20.03	13.3609	3	3
1,2-dichloroethane	dimethylformamide	0.79	0.21	17.07	10.5161	3	3
1,2-dichloroethane	dimethylformamide	0.9	0.1	14	7.9603	3	2
1,2-dichloroethane	dimethylformamide	1	0	10.69	5.7012	3	2
1,2-dichloroethane	propanol	1	0	10.43	5.7014	3	2
1,2-dichloroethane	propanol	0.89	0.11	10.6	6.2998	3	2
1,2-dichloroethane	propanol	0.79	0.21	11.1	7.0735	3	2
1,2-dichloroethane	propanol	0.69	0.31	12.7	8.0252	3	2
1,2-dichloroethane	propanol	0.58	0.42	14.5	9.1911	3	2
1,2-dichloroethane	propanol	0.48	0.52	16.3	10.6113	3	3
1,2-dichloroethane	propanol	0.38	0.62	17.8	12.3371	3	3
1,2-dichloroethane	propanol	0.29	0.71	18.9	14.3949	3	3
1,2-dichloroethane	propanol	0.19	0.81	19.7	16.8699	3	3
1,2-dichloroethane	propanol	0.09	0.91	20.2	19.8119	3	3
1,2-dichloroethane	propanol	0	1	20.73	23.2682	3	3
methylformamide	dimethylformamide	1	0	182.4	147.255	4	4
methylformamide	dimethylformamide	0.98	0.02	179.51	144.045	4	4
methylformamide	dimethylformamide	0.95	0.05	175.2	139.216	4	4
methylformamide	dimethylformamide	0.9	0.1	167.91	131.201	4	4
methylformamide	dimethylformamide	0.8	0.2	153.46	115.651	4	4
methylformamide	dimethylformamide	0.7	0.3	139	101.199	4	4
methylformamide	dimethylformamide	0.6	0.4	124.52	88.1397	4	4
methylformamide	dimethylformamide	0.5	0.5	110.03	76.5662	4	4
methylformamide	dimethylformamide	0.4	0.6	95.55	66.4406	4	4
methylformamide	dimethylformamide	0.3	0.7	81.12	57.7885	4	4
methylformamide	dimethylformamide	0.2	0.8	66.64	50.1096	4	4
methylformamide	dimethylformamide	0.1	0.9	52.17	43.525	4	4
methylformamide	dimethylformamide	0.05	0.95	44.91	40.5441	4	4
methylformamide	dimethylformamide	0.02	0.98	40.6	38.8624	4	4
methylformamide	dimethylformamide	0	1	37.7	37.7835	4	4
methylformamide	dioxane	1	0	182.4	147.522	4	4
methylformamide	dioxane	0.97	0.03	161.1	132.449	4	4
methylformamide	dioxane	0.95	0.05	144.2	120.478	4	4
methylformamide	dioxane	0.92	0.08	119.9	102.519	4	4
methylformamide	dioxane	0.88	0.12	97.3	87.2739	4	4
methylformamide	dioxane	0.84	0.16	78.05	74.1469	4	4
methylformamide	dioxane	0.8	0.2	62.51	63.5846	4	4
methylformamide	dioxane	0.73	0.27	38.23	46.1903	4	4
methylformamide	dioxane	0.68	0.32	26.86	37.0925	3	4
methylformamide	dioxane	0.64	0.36	22.94	30.9417	3	3
methylformamide	dioxane	0.57	0.43	21.13	22.2485	3	3
methylformamide	dioxane	0.38	0.62	17.14	9.1206	3	2
methylformamide	dioxane	0.27	0.73	13.92	4.9801	3	2
methylformamide	dioxane	0.14	0.86	8.95	2.7127	2	1
methylformamide	dioxane	0	1	2.31	2	1	1
methylformamide	pyridine	1	0	173.5	146.122	4	4
methylformamide	pyridine	0.9	0.1	138.6	106.928	4	4
methylformamide	pyridine	0.8	0.2	115.7	78.854	4	4
methylformamide	pyridine	0.7	0.3	101.7	58.7663	4	4
methylformamide	pyridine	0.6	0.4	86.3	44.3676	4	4
methylformamide	pyridine	0.5	0.5	71.2	34.0842	4	3
methylformamide	pyridine	0.4	0.6	55.5	26.729	4	3
methylformamide	pyridine	0.3	0.7	42.2	21.4831	4	3
methylformamide	pyridine	0.2	0.8	31.6	17.7376	3	3
methylformamide	pyridine	0.1	0.9	23	15.0241	3	3
methylformamide	pyridine	0	1	12	12.9365	3	3
ethanol	dimethylformamide	1	0	23.85	30.6057	3	3
ethanol	dimethylformamide	0.92	0.08	32.29	35.1064	3	4
ethanol	dimethylformamide	0.75	0.25	35.99	38.8893	4	4
ethanol	dimethylformamide	0.66	0.34	37.31	38.9934	4	4
ethanol	dimethylformamide	0.57	0.43	38.73	38.5595	4	4
ethanol	dimethylformamide	0.51	0.49	39.61	38.1995	4	4
ethanol	dimethylformamide	0.46	0.54	39.52	37.9007	4	4
ethanol	dimethylformamide	0.36	0.64	39.3	37.4336	4	4
ethanol	dimethylformamide	0.13	0.87	38.49	37.2692	4	4
ethanol	dimethylformamide	0	1	37.7	37.7835	4	4
ethanol	2-methoxyethanol	1	0	25.04	30.7128	3	3
ethanol	2-methoxyethanol	0.87	0.13	23.82	27.2699	3	3
ethanol	2-methoxyethanol	0.75	0.25	23.72	24.7375	3	3
ethanol	2-methoxyethanol	0.63	0.37	23.44	22.8079	3	3
ethanol	2-methoxyethanol	0.53	0.47	23.94	21.2933	3	3
ethanol	2-methoxyethanol	0.43	0.57	23.02	20.0764	3	3
ethanol	2-methoxyethanol	0.33	0.67	22.57	19.0797	3	3
ethanol	2-methoxyethanol	0.24	0.76	21.31	18.2491	3	3
ethanol	2-methoxyethanol	0.16	0.84	19.52	17.5474	3	3
ethanol	2-methoxyethanol	0.08	0.92	19.51	16.948	3	3
ethanol	2-methoxyethanol	0	1	17.58	16.4296	3	3
ethanol	gamma-butyrolactone	1	0	24.55	30.7235	3	3
ethanol	gamma-butyrolactone	0.9	0.1	26.52	32.7452	3	3
ethanol	gamma-butyrolactone	0.78	0.22	28.82	34.2314	3	3
ethanol	gamma-butyrolactone	0.7	0.3	30.36	35.0343	3	4
ethanol	gamma-butyrolactone	0.59	0.41	32.49	36.0675	3	4
ethanol	gamma-butyrolactone	0.5	0.5	34.11	36.8966	3	4
ethanol	gamma-butyrolactone	0.4	0.6	35.79	37.9966	4	4
ethanol	gamma-butyrolactone	0.3	0.7	37.38	39.2388	4	4
ethanol	gamma-butyrolactone	0.2	0.8	38.97	40.775	4	4
ethanol	gamma-butyrolactone	0.1	0.9	40.38	42.4586	4	4
ethanol	gamma-butyrolactone	0	1	41.66	44.3079	4	4
ethanol	n,n-dimethylacetamide	1	0	24.55	30.5229	3	3
ethanol	n,n-dimethylacetamide	0.9	0.1	26.22	35.801	3	4
ethanol	n,n-dimethylacetamide	0.8	0.2	27.93	37.5199	3	4
ethanol	n,n-dimethylacetamide	0.7	0.3	29.51	36.9428	3	4
ethanol	n,n-dimethylacetamide	0.6	0.4	30.97	35.7253	3	4
ethanol	n,n-dimethylacetamide	0.5	0.5	32.42	34.434	3	3
ethanol	n,n-dimethylacetamide	0.4	0.6	33.54	33.1067	3	3
ethanol	n,n-dimethylacetamide	0.3	0.7	34.82	32.0564	3	3
ethanol	n,n-dimethylacetamide	0.2	0.8	36.01	31.3535	4	3
ethanol	n,n-dimethylacetamide	0.1	0.9	36.94	30.9402	4	3
ethanol	n,n-dimethylacetamide	0	1	37.75	30.878	4	3
ethanol	ethoxyethanol	1	0	25.13	30.6239	3	3
ethanol	ethoxyethanol	0.92	0.08	23.18	27.8014	3	3
ethanol	ethoxyethanol	0.83	0.17	21.79	25.2155	3	3
ethanol	ethoxyethanol	0.73	0.27	20.45	22.8618	3	3
ethanol	ethoxyethanol	0.62	0.38	18.95	20.6992	3	3
ethanol	ethoxyethanol	0.5	0.5	17.52	18.7392	3	3
ethanol	ethoxyethanol	0.36	0.64	16.07	16.9495	3	3
ethanol	ethoxyethanol	0.19	0.81	14.78	15.327	3	3
ethanol	ethoxyethanol	0	1	13.94	13.8426	3	3
ethanol	pyridine	1	0	24.08	30.3462	3	3
ethanol	pyridine	0.9	0.1	23.17	23.5253	3	3
ethanol	pyridine	0.8	0.2	21.73	19.0793	3	3
ethanol	pyridine	0.7	0.3	21.39	16.2867	3	3
ethanol	pyridine	0.6	0.4	20.11	14.4548	3	3
ethanol	pyridine	0.5	0.5	18.36	13.3584	3	3
ethanol	pyridine	0.4	0.6	17.26	12.7388	3	3
ethanol	pyridine	0.3	0.7	16.52	12.4683	3	3
ethanol	pyridine	0.2	0.8	14.84	12.4617	3	3
ethanol	pyridine	0.1	0.9	13.44	12.6462	3	3
ethanol	pyridine	0	1	12.02	12.9365	3	3
ethanol	benzene	1	0	25.13	30.5622	3	3
ethanol	benzene	0.92	0.08	22.18	22.672	3	3
ethanol	benzene	0.82	0.18	18.38	16.3239	3	3
ethanol	benzene	0.72	0.28	15.22	11.3427	3	3
ethanol	benzene	0.61	0.39	12.38	7.5667	3	2
ethanol	benzene	0.48	0.52	8.49	4.8987	2	2
ethanol	benzene	0.34	0.66	5.39	3.1815	2	1
ethanol	benzene	0.18	0.82	3.29	2.2701	1	1
ethanol	benzene	0	1	2.28	2	1	1
ethanol	cyclohexane	1	0	24.55	30.5598	3	3
ethanol	cyclohexane	0.94	0.06	22.204	24.668	3	3
ethanol	cyclohexane	0.88	0.12	19.719	19.5933	3	3
ethanol	cyclohexane	0.81	0.19	17.1	15.0156	3	3
ethanol	cyclohexane	0.73	0.27	14.423	11.2171	3	3
ethanol	cyclohexane	0.65	0.35	11.708	8.1589	3	2
ethanol	cyclohexane	0.55	0.45	8.999	5.7853	2	2
ethanol	cyclohexane	0.44	0.56	6.344	4.0045	2	2
ethanol	cyclohexane	0.31	0.69	4.062	2.8311	2	1
ethanol	cyclohexane	0.17	0.83	2.579	2.1898	1	1
ethanol	cyclohexane	0	1	2.015	2	1	1
ethanol	2-butoxyethanol	1	0	25.13	30.5351	3	3
ethanol	2-butoxyethanol	0.94	0.06	22.81	28.0996	3	3
ethanol	2-butoxyethanol	0.87	0.13	20.9	25.7874	3	3
ethanol	2-butoxyethanol	0.79	0.21	19.06	23.5491	3	3
ethanol	2-butoxyethanol	0.69	0.31	17.19	21.4257	3	3
ethanol	2-butoxyethanol	0.57	0.43	15.15	19.3904	3	3
ethanol	2-butoxyethanol	0.43	0.57	13.15	17.4604	3	3
ethanol	2-butoxyethanol	0.24	0.76	11.22	15.5983	3	3
ethanol	2-butoxyethanol	0	1	9.87	13.8192	2	3
ethanol	ethylsilicate	1	0	26.58	29.3395	3	3
ethanol	ethylsilicate	1	0	26.72	28.8589	3	3
ethanol	ethylsilicate	1	0	26.4	28.531	3	3
ethanol	ethylsilicate	0.99	0.01	25.65	27.0044	3	3
ethanol	ethylsilicate	0.98	0.02	25.01	24.8185	3	3
ethanol	ethylsilicate	0.95	0.05	22.73	20.4617	3	3
ethanol	ethylsilicate	0.91	0.09	19.86	16.7488	3	3
ethanol	ethylsilicate	0.87	0.13	17.78	13.3608	3	3
ethanol	ethylsilicate	0.82	0.18	14.63	10.2392	3	3
dimethylsulfoxide	dimethylformamide	1	0	46.48	41.019	4	4
dimethylsulfoxide	dimethylformamide	0.95	0.05	46.09	40.8511	4	4
dimethylsulfoxide	dimethylformamide	0.9	0.1	45.7	40.6839	4	4
dimethylsulfoxide	dimethylformamide	0.85	0.15	45.3	40.5174	4	4
dimethylsulfoxide	dimethylformamide	0.8	0.2	44.9	40.3515	4	4
dimethylsulfoxide	dimethylformamide	0.75	0.25	44.48	40.1862	4	4
dimethylsulfoxide	dimethylformamide	0.7	0.3	44.06	40.0216	4	4
dimethylsulfoxide	dimethylformamide	0.65	0.35	43.62	39.8576	4	4
dimethylsulfoxide	dimethylformamide	0.6	0.4	43.18	39.6943	4	4
dimethylsulfoxide	dimethylformamide	0.55	0.45	42.72	39.5317	4	4
dimethylsulfoxide	dimethylformamide	0.5	0.5	42.25	39.3696	4	4
dimethylsulfoxide	dimethylformamide	0.45	0.55	41.77	39.2082	4	4
dimethylsulfoxide	dimethylformamide	0.4	0.6	41.28	39.0474	4	4
dimethylsulfoxide	dimethylformamide	0.35	0.65	40.78	38.8873	4	4
dimethylsulfoxide	dimethylformamide	0.3	0.7	40.25	38.7277	4	4
dimethylsulfoxide	dimethylformamide	0.25	0.75	39.72	38.5688	4	4
dimethylsulfoxide	dimethylformamide	0.2	0.8	39.16	38.4105	4	4
dimethylsulfoxide	dimethylformamide	0.15	0.85	38.59	38.2529	4	4
dimethylsulfoxide	dimethylformamide	0.1	0.9	38	38.0958	4	4
dimethylsulfoxide	dimethylformamide	0.05	0.95	37.38	37.9394	4	4
dimethylsulfoxide	dimethylformamide	0	1	36.74	37.7835	4	4
dimethylsulfoxide	propanol	1	0	45.91	41.019	4	4
dimethylsulfoxide	propanol	0.95	0.05	45.41	39.8059	4	4
dimethylsulfoxide	propanol	0.9	0.1	44.89	38.8043	4	4
dimethylsulfoxide	propanol	0.85	0.15	44.28	38.0819	4	4
dimethylsulfoxide	propanol	0.79	0.21	43.48	37.4368	4	4
dimethylsulfoxide	propanol	0.69	0.31	42.1	37.0026	4	4
dimethylsulfoxide	propanol	0.62	0.38	41.06	37.0749	4	4
dimethylsulfoxide	propanol	0.54	0.46	39.71	37.3648	4	4
dimethylsulfoxide	propanol	0.5	0.5	38.95	37.6437	4	4
dimethylsulfoxide	propanol	0.44	0.56	37.28	38.0569	4	4
dimethylsulfoxide	propanol	0.34	0.66	34.06	38.3755	3	4
dimethylsulfoxide	propanol	0.26	0.74	30.02	37.804	3	4
dimethylsulfoxide	propanol	0.19	0.81	26.77	36.1104	3	4
dimethylsulfoxide	propanol	0.11	0.89	24.04	32.6118	3	3
dimethylsulfoxide	propanol	0.03	0.97	21.32	26.6225	3	3
dimethylsulfoxide	propanol	0	1	20.13	23.0341	3	3
dimethylsulfoxide	2-methoxyethanol	1	0	46.84	41.019	4	4
dimethylsulfoxide	2-methoxyethanol	0.95	0.05	45.17	39.3193	4	4
dimethylsulfoxide	2-methoxyethanol	0.9	0.1	44.04	37.8662	4	4
dimethylsulfoxide	2-methoxyethanol	0.85	0.15	43.02	36.644	4	4
dimethylsulfoxide	2-methoxyethanol	0.8	0.2	42.05	35.6099	4	4
dimethylsulfoxide	2-methoxyethanol	0.75	0.25	41.04	34.7369	4	3
dimethylsulfoxide	2-methoxyethanol	0.69	0.31	39.98	34.0055	4	3
dimethylsulfoxide	2-methoxyethanol	0.64	0.36	38.84	33.3873	4	3
dimethylsulfoxide	2-methoxyethanol	0.59	0.41	37.59	32.8127	4	3
dimethylsulfoxide	2-methoxyethanol	0.54	0.46	36.22	32.2903	4	3
dimethylsulfoxide	2-methoxyethanol	0.49	0.51	34.74	31.7532	3	3
dimethylsulfoxide	2-methoxyethanol	0.44	0.56	33.14	31.1513	3	3
dimethylsulfoxide	2-methoxyethanol	0.39	0.61	31.47	30.4433	3	3
dimethylsulfoxide	2-methoxyethanol	0.34	0.66	29.71	29.5706	3	3
dimethylsulfoxide	2-methoxyethanol	0.29	0.71	27.87	28.4833	3	3
dimethylsulfoxide	2-methoxyethanol	0.25	0.75	26.05	27.1768	3	3
dimethylsulfoxide	2-methoxyethanol	0.2	0.8	24.18	25.5735	3	3
dimethylsulfoxide	2-methoxyethanol	0.15	0.85	22.34	23.7232	3	3
dimethylsulfoxide	2-methoxyethanol	0.1	0.9	20.51	21.5435	3	3
dimethylsulfoxide	2-methoxyethanol	0.05	0.95	18.71	19.0855	3	3
dimethylsulfoxide	2-methoxyethanol	0	1	16.95	16.3704	3	3
dimethylsulfoxide	ethoxyethanol	1	0	47.13	41.019	4	4
dimethylsulfoxide	ethoxyethanol	0.91	0.1	44.13	37.2568	4	4
dimethylsulfoxide	ethoxyethanol	0.8	0.2	41.26	34.2246	4	3
dimethylsulfoxide	ethoxyethanol	0.69	0.31	37.93	31.8665	4	3
dimethylsulfoxide	ethoxyethanol	0.58	0.42	34.02	29.9118	3	3
dimethylsulfoxide	ethoxyethanol	0.45	0.55	29.59	28.0174	3	3
dimethylsulfoxide	ethoxyethanol	0.31	0.69	24.49	25.4015	3	3
dimethylsulfoxide	ethoxyethanol	0.16	0.84	19.64	21.0105	3	3
dimethylsulfoxide	ethoxyethanol	0	1	13.94	13.801	3	3
dimethylsulfoxide	2-butoxyethanol	1	0	47.13	41.019	4	4
dimethylsulfoxide	2-butoxyethanol	0.93	0.07	43.29	37.6388	4	4
dimethylsulfoxide	2-butoxyethanol	0.85	0.15	39.74	34.6616	4	3
dimethylsulfoxide	2-butoxyethanol	0.75	0.25	35.72	32.0773	4	3
dimethylsulfoxide	2-butoxyethanol	0.65	0.35	31.31	29.8889	3	3
dimethylsulfoxide	2-butoxyethanol	0.53	0.47	26.36	27.9541	3	3
dimethylsulfoxide	2-butoxyethanol	0.38	0.62	20.9	25.7287	3	3
dimethylsulfoxide	2-butoxyethanol	0.21	0.79	15.52	21.838	3	3
dimethylsulfoxide	2-butoxyethanol	0	1	9.87	13.7747	2	3
glycol2	methylacetate	1	0	40.252	35.0836	4	4
glycol2	methylacetate	0.96	0.04	37.941	31.3791	4	3
glycol2	methylacetate	0.85	0.15	32.667	24.696	3	3
glycol2	methylacetate	0.75	0.25	27.826	20.1377	3	3
glycol2	methylacetate	0.65	0.35	23.526	17.0677	3	3
glycol2	methylacetate	0.56	0.44	19.849	14.8157	3	3
glycol2	methylacetate	0.51	0.49	18.225	13.9374	3	3
glycol2	methylacetate	0.45	0.55	16.036	12.8418	3	3
glycol2	methylacetate	0.35	0.65	13.109	11.5139	3	3
glycol2	methylacetate	0.25	0.75	10.726	10.5146	3	3
glycol2	methylacetate	0.15	0.85	8.809	9.7389	2	2
glycol2	methylacetate	0.05	0.95	7.455	9.1563	2	2
glycol2	methylacetate	0	1	6.864	8.8658	2	2
glycol2	2-methoxyethanol	1	0	40.97	35.3103	4	4
glycol2	2-methoxyethanol	0.93	0.07	38.44	33.4237	4	3
glycol2	2-methoxyethanol	0.85	0.15	36.08	31.5349	4	3
glycol2	2-methoxyethanol	0.77	0.23	33.7	29.341	3	3
glycol2	2-methoxyethanol	0.68	0.32	31.18	27.4576	3	3
glycol2	2-methoxyethanol	0.59	0.41	28.87	25.5785	3	3
glycol2	2-methoxyethanol	0.49	0.51	26.25	23.705	3	3
glycol2	2-methoxyethanol	0.38	0.62	23.57	21.841	3	3
glycol2	2-methoxyethanol	0.26	0.74	21.18	19.9899	3	3
glycol2	2-methoxyethanol	0.14	0.86	19.06	18.1574	3	3
glycol2	2-methoxyethanol	0	1	16.94	16.3526	3	3
glycol2	ethoxyethanol	1	0	41.12	35.2046	4	4
glycol2	ethoxyethanol	0.92	0.08	36.88	32.4951	4	3
glycol2	ethoxyethanol	0.84	0.16	33.39	29.7906	3	3
glycol2	ethoxyethanol	0.74	0.26	30.09	27.0871	3	3
glycol2	ethoxyethanol	0.64	0.36	26.4	24.4189	3	3
glycol2	ethoxyethanol	0.51	0.49	22.9	21.5095	3	3
glycol2	ethoxyethanol	0.37	0.63	19.64	18.9052	3	3
glycol2	ethoxyethanol	0.2	0.8	16.57	16.3235	3	3
glycol2	ethoxyethanol	0	1	13.94	13.7891	3	3
glycol2	2-butoxyethanol	1	0	41.12	35.1298	4	4
glycol2	2-butoxyethanol	0.94	0.06	35.97	32.503	4	3
glycol2	2-butoxyethanol	0.88	0.12	31.9	29.8533	3	3
glycol2	2-butoxyethanol	0.8	0.2	27.67	27.2092	3	3
glycol2	2-butoxyethanol	0.7	0.3	23.49	24.5603	3	3
glycol2	2-butoxyethanol	0.59	0.41	19.59	21.9145	3	3
glycol2	2-butoxyethanol	0.44	0.56	15.94	19.2489	3	3
glycol2	2-butoxyethanol	0.25	0.75	12.54	16.5676	3	3
glycol2	2-butoxyethanol	0	1	9.87	13.8224	2	3
methylacetate	propanol	1	0	6.74	8.8658	2	2
methylacetate	propanol	0.89	0.11	9.78	9.14	2	2
methylacetate	propanol	0.79	0.21	10.48	9.5148	3	2
methylacetate	propanol	0.69	0.31	11.46	10.0075	3	3
methylacetate	propanol	0.59	0.41	12.34	10.6613	3	3
methylacetate	propanol	0.49	0.51	13.07	11.5139	3	3
methylacetate	propanol	0.39	0.61	15.01	12.6309	3	3
methylacetate	propanol	0.29	0.71	16.98	14.1172	3	3
methylacetate	propanol	0.19	0.81	17.93	16.1412	3	3
methylacetate	propanol	0.09	0.91	18.5	18.9954	3	3
methylacetate	propanol	0	1	19.37	23.2323	3	3
propionicacid	ethylacetate	1	0	3.3564	4.5752	1	2
propionicacid	ethylacetate	0.9	0.1	3.873	5.2399	2	2
propionicacid	ethylacetate	0.8	0.2	4.2174	5.9028	2	2
propionicacid	ethylacetate	0.7	0.3	4.5372	6.4933	2	2
propionicacid	ethylacetate	0.6	0.4	4.7586	6.9992	2	2
propionicacid	ethylacetate	0.5	0.5	4.98	7.3918	2	2
propionicacid	ethylacetate	0.4	0.6	5.1522	7.6674	2	2
propionicacid	ethylacetate	0.3	0.7	5.349	7.8735	2	2
propionicacid	ethylacetate	0.2	0.8	5.5704	8.0539	2	2
propionicacid	ethylacetate	0.1	0.9	5.8164	8.2582	2	2
propionicacid	ethylacetate	0	1	6.0132	8.5633	2	2
propionicacid	2-propenoicacidethylester	1	0	3.3564	4.5795	1	2
propionicacid	2-propenoicacidethylester	0.9	0.1	3.7746	5.1129	2	2
propionicacid	2-propenoicacidethylester	0.8	0.2	4.119	5.6315	2	2
propionicacid	2-propenoicacidethylester	0.7	0.3	4.4634	6.0678	2	2
propionicacid	2-propenoicacidethylester	0.6	0.4	4.734	6.4193	2	2
propionicacid	2-propenoicacidethylester	0.5	0.5	5.0046	6.6636	2	2
propionicacid	2-propenoicacidethylester	0.4	0.6	5.2752	6.8166	2	2
propionicacid	2-propenoicacidethylester	0.3	0.7	5.5212	6.9025	2	2
propionicacid	2-propenoicacidethylester	0.2	0.8	5.7426	6.9604	2	2
propionicacid	2-propenoicacidethylester	0.1	0.9	5.964	7.0152	2	2
propionicacid	2-propenoicacidethylester	0	1	6.21	7.1106	2	2
propionicacid	n-butylacetate	1	0	3.3564	4.5712	1	2
propionicacid	n-butylacetate	0.89	0.11	3.5778	5.1388	2	2
propionicacid	n-butylacetate	0.8	0.2	3.75	5.6157	2	2
propionicacid	n-butylacetate	0.7	0.3	3.9222	6.0171	2	2
propionicacid	n-butylacetate	0.59	0.41	4.0944	6.3396	2	2
propionicacid	n-butylacetate	0.5	0.5	4.242	6.537	2	2
propionicacid	n-butylacetate	0.4	0.6	4.3896	6.6574	2	2
propionicacid	n-butylacetate	0.3	0.7	4.5372	6.7218	2	2
propionicacid	n-butylacetate	0.2	0.8	4.7094	6.7717	2	2
propionicacid	n-butylacetate	0.1	0.9	4.857	6.8516	2	2
propionicacid	n-butylacetate	0	1	5.0046	7.0009	2	2
propionicacid	ethylbutyrate	1	0	3.3564	4.5692	1	2
propionicacid	ethylbutyrate	0.89	0.11	3.6024	5.082	2	2
propionicacid	ethylbutyrate	0.8	0.2	3.7992	5.5169	2	2
propionicacid	ethylbutyrate	0.7	0.3	3.996	5.8873	2	2
propionicacid	ethylbutyrate	0.6	0.4	4.1928	6.1641	2	2
propionicacid	ethylbutyrate	0.52	0.48	4.2912	6.312	2	2
propionicacid	ethylbutyrate	0.4	0.6	4.4634	6.4124	2	2
propionicacid	ethylbutyrate	0.3	0.7	4.611	6.4339	2	2
propionicacid	ethylbutyrate	0.2	0.8	4.7094	6.4347	2	2
propionicacid	ethylbutyrate	0.09	0.91	4.857	6.4484	2	2
propionicacid	ethylbutyrate	0	1	5.0046	6.5127	2	2
propionicacid	ethylbenzoate	1	0	3.3564	4.5954	1	2
propionicacid	ethylbenzoate	0.9	0.1	3.7992	5.0739	2	2
propionicacid	ethylbenzoate	0.8	0.2	4.1436	5.4977	2	2
propionicacid	ethylbenzoate	0.7	0.3	4.4634	5.8443	2	2
propionicacid	ethylbenzoate	0.6	0.4	4.7094	6.0933	2	2
propionicacid	ethylbenzoate	0.5	0.5	4.9554	6.2549	2	2
propionicacid	ethylbenzoate	0.4	0.6	5.2014	6.3541	2	2
propionicacid	ethylbenzoate	0.3	0.7	5.4228	6.4237	2	2
propionicacid	ethylbenzoate	0.2	0.8	5.595	6.4931	2	2
propionicacid	ethylbenzoate	0.1	0.9	5.7672	6.5895	2	2
propionicacid	ethylbenzoate	0	1	5.9394	6.7442	2	2
propionicacid	benzoicacidphenylmethylester	1	0	3.3564	4.5983	1	2
propionicacid	benzoicacidphenylmethylester	0.91	0.09	3.504	4.9013	2	2
propionicacid	benzoicacidphenylmethylester	0.79	0.21	3.6762	5.2415	2	2
propionicacid	benzoicacidphenylmethylester	0.69	0.31	3.873	5.4568	2	2
propionicacid	benzoicacidphenylmethylester	0.6	0.4	3.996	5.5961	2	2
propionicacid	benzoicacidphenylmethylester	0.5	0.5	4.1436	5.6771	2	2
propionicacid	benzoicacidphenylmethylester	0.39	0.61	4.2912	5.7341	2	2
propionicacid	benzoicacidphenylmethylester	0.31	0.69	4.4142	5.7649	2	2
propionicacid	benzoicacidphenylmethylester	0.2	0.8	4.5618	5.8237	2	2
propionicacid	benzoicacidphenylmethylester	0.12	0.88	4.7094	5.8905	2	2
propionicacid	benzoicacidphenylmethylester	0	1	4.8816	6.0386	2	2
dimethylcarbonate	propylenecarbonate	1	0	3.2	2.6195	1	1
dimethylcarbonate	propylenecarbonate	0.95	0.05	4.8	3.2133	2	1
dimethylcarbonate	propylenecarbonate	0.91	0.09	6.69	4.0118	2	2
dimethylcarbonate	propylenecarbonate	0.86	0.14	9.24	5.1994	2	2
dimethylcarbonate	propylenecarbonate	0.8	0.2	12.13	6.6878	3	2
dimethylcarbonate	propylenecarbonate	0.76	0.24	14.61	8.072	3	2
dimethylcarbonate	propylenecarbonate	0.7	0.3	18.17	10.237	3	3
dimethylcarbonate	propylenecarbonate	0.65	0.35	21.16	12.2149	3	3
dimethylcarbonate	propylenecarbonate	0.6	0.4	24.21	14.4025	3	3
dimethylcarbonate	propylenecarbonate	0.55	0.45	27.24	16.903	3	3
dimethylcarbonate	propylenecarbonate	0.5	0.5	30.14	19.4653	3	3
dimethylcarbonate	propylenecarbonate	0.46	0.54	33.05	22.2033	3	3
dimethylcarbonate	propylenecarbonate	0.4	0.6	36.51	25.6282	4	3
dimethylcarbonate	propylenecarbonate	0.36	0.64	39.36	28.5193	4	3
dimethylcarbonate	propylenecarbonate	0.3	0.7	43.24	32.6164	4	3
dimethylcarbonate	propylenecarbonate	0.25	0.75	46.81	36.5301	4	4
dimethylcarbonate	propylenecarbonate	0.2	0.8	50.04	40.1986	4	4
dimethylcarbonate	propylenecarbonate	0.14	0.86	54.63	45.6037	4	4
dimethylcarbonate	propylenecarbonate	0.1	0.9	57.51	49.1068	4	4
dimethylcarbonate	propylenecarbonate	0.03	0.97	62.3	55.1225	4	4
dimethylcarbonate	propylenecarbonate	0	1	64.9	58.4751	4	4
dimethylformamide	2-methoxyethanol	1	0	40.21	37.7835	4	4
dimethylformamide	2-methoxyethanol	0.9	0.1	39.45	35.3528	4	4
dimethylformamide	2-methoxyethanol	0.8	0.2	39.13	33.3164	4	3
dimethylformamide	2-methoxyethanol	0.69	0.3	36.33	31.5379	4	3
dimethylformamide	2-methoxyethanol	0.59	0.41	35.98	29.8923	4	3
dimethylformamide	2-methoxyethanol	0.49	0.51	35.64	28.2226	4	3
dimethylformamide	2-methoxyethanol	0.39	0.61	32.46	26.4805	3	3
dimethylformamide	2-methoxyethanol	0.3	0.7	30.03	24.534	3	3
dimethylformamide	2-methoxyethanol	0.2	0.8	25.34	22.2668	3	3
dimethylformamide	2-methoxyethanol	0.1	0.9	21.99	19.5863	3	3
dimethylformamide	2-methoxyethanol	0	1	17.58	16.4244	3	3
dimethylformamide	ethoxyethanol	1	0	37.65	37.7835	4	4
dimethylformamide	ethoxyethanol	0.9	0.1	34.82	34.696	3	3
dimethylformamide	ethoxyethanol	0.79	0.21	32.49	31.9433	3	3
dimethylformamide	ethoxyethanol	0.68	0.32	30.23	29.4019	3	3
dimethylformamide	ethoxyethanol	0.56	0.44	27.47	26.8961	3	3
dimethylformamide	ethoxyethanol	0.43	0.57	24.45	24.334	3	3
dimethylformamide	ethoxyethanol	0.3	0.7	21.08	21.4879	3	3
dimethylformamide	ethoxyethanol	0.15	0.85	17.78	18.1018	3	3
dimethylformamide	ethoxyethanol	0	1	13.94	13.8346	3	3
dimethylformamide	pyridine	1	0	37.9	37.7835	4	4
dimethylformamide	pyridine	0.9	0.1	34.6	34.6129	3	3
dimethylformamide	pyridine	0.8	0.2	31.8	31.5984	3	3
dimethylformamide	pyridine	0.7	0.3	28.2	28.7386	3	3
dimethylformamide	pyridine	0.6	0.4	29.3	26.0321	3	3
dimethylformamide	pyridine	0.5	0.5	26	23.4775	3	3
dimethylformamide	pyridine	0.4	0.6	19.8	21.0735	3	3
dimethylformamide	pyridine	0.3	0.7	18.8	18.8187	3	3
dimethylformamide	pyridine	0.2	0.8	17.2	16.7118	3	3
dimethylformamide	pyridine	0.1	0.9	15.6	14.7515	3	3
dimethylformamide	pyridine	0	1	12	12.9365	3	3
dimethylformamide	chlorobenzene	1	0	37.06	37.7835	4	4
dimethylformamide	chlorobenzene	0.87	0.13	33.7	31.5924	3	3
dimethylformamide	chlorobenzene	0.75	0.25	30.7	26.5078	3	3
dimethylformamide	chlorobenzene	0.64	0.36	27.83	22.3018	3	3
dimethylformamide	chlorobenzene	0.53	0.47	24.82	18.8082	3	3
dimethylformamide	chlorobenzene	0.43	0.57	21.61	15.893	3	3
dimethylformamide	chlorobenzene	0.34	0.66	18.68	13.4551	3	3
dimethylformamide	chlorobenzene	0.24	0.76	16.09	11.4103	3	3
dimethylformamide	chlorobenzene	0.16	0.84	13.08	9.6928	3	2
dimethylformamide	chlorobenzene	0.08	0.92	10.27	8.2507	3	2
dimethylformamide	chlorobenzene	0	1	5.66	7.0406	2	2
dimethylformamide	2-butoxyethanol	1	0	37.65	37.7835	4	4
dimethylformamide	2-butoxyethanol	0.92	0.08	34.26	34.884	3	3
dimethylformamide	2-butoxyethanol	0.84	0.16	31.22	32.1818	3	3
dimethylformamide	2-butoxyethanol	0.74	0.26	27.94	29.6199	3	3
dimethylformamide	2-butoxyethanol	0.63	0.37	24.84	27.1412	3	3
dimethylformamide	2-butoxyethanol	0.51	0.49	21.18	24.6064	3	3
dimethylformamide	2-butoxyethanol	0.36	0.64	17.53	21.8333	3	3
dimethylformamide	2-butoxyethanol	0.2	0.8	13.76	18.4252	3	3
dimethylformamide	2-butoxyethanol	0	1	9.87	13.7965	2	3
2-propanol	n,n-dimethylacetamide	1	0	18.2	22.0464	3	3
2-propanol	n,n-dimethylacetamide	0.9	0.1	20	27.2159	3	3
2-propanol	n,n-dimethylacetamide	0.8	0.2	21.53	29.6832	3	3
2-propanol	n,n-dimethylacetamide	0.7	0.3	23.19	30.6733	3	3
2-propanol	n,n-dimethylacetamide	0.6	0.4	25.03	30.7723	3	3
2-propanol	n,n-dimethylacetamide	0.5	0.5	27.02	30.4966	3	3
2-propanol	n,n-dimethylacetamide	0.4	0.6	29.14	30.2056	3	3
2-propanol	n,n-dimethylacetamide	0.3	0.7	31.37	29.9579	3	3
2-propanol	n,n-dimethylacetamide	0.2	0.8	33.69	29.9392	3	3
2-propanol	n,n-dimethylacetamide	0.1	0.9	36.07	30.229	4	3
2-propanol	n,n-dimethylacetamide	0	1	37.75	30.878	4	3
propanol	pyridine	1	0	20.21	23.057	3	3
propanol	pyridine	0.9	0.1	17.22	18.5806	3	3
propanol	pyridine	0.8	0.2	16.72	15.5787	3	3
propanol	pyridine	0.7	0.3	15.68	13.7092	3	3
propanol	pyridine	0.6	0.4	15.11	12.5532	3	3
propanol	pyridine	0.5	0.5	14.45	11.8723	3	3
propanol	pyridine	0.4	0.6	14.21	11.6138	3	3
propanol	pyridine	0.3	0.7	13.86	11.6522	3	3
propanol	pyridine	0.2	0.8	13.46	11.9267	3	3
propanol	pyridine	0.1	0.9	12.92	12.3801	3	3
propanol	pyridine	0	1	12.02	12.9365	3	3
2-propanol	methylmethacrylate	1	0	19.255	22.1672	3	3
2-propanol	methylmethacrylate	0.94	0.06	18.243	19.7047	3	3
2-propanol	methylmethacrylate	0.84	0.16	16.292	16.3607	3	3
2-propanol	methylmethacrylate	0.74	0.26	14.229	13.8924	3	3
2-propanol	methylmethacrylate	0.65	0.35	12.482	12.2764	3	3
2-propanol	methylmethacrylate	0.57	0.43	11.166	11.2372	3	3
2-propanol	methylmethacrylate	0.5	0.5	10.085	10.4801	3	3
2-propanol	methylmethacrylate	0.45	0.55	9.432	10.024	2	3
2-propanol	methylmethacrylate	0.34	0.66	8.323	9.256	2	2
2-propanol	methylmethacrylate	0.24	0.76	7.539	8.6834	2	2
2-propanol	methylmethacrylate	0.15	0.85	7.023	8.2593	2	2
2-propanol	methylmethacrylate	0.05	0.95	6.677	7.9399	2	2
2-propanol	methylmethacrylate	0	1	6.533	7.8078	2	2
propyleneglycol	ethylacetate	1	0	28.373	20.0135	3	3
propyleneglycol	ethylacetate	0.95	0.05	26.908	18.7535	3	3
propyleneglycol	ethylacetate	0.85	0.15	23.637	16.3294	3	3
propyleneglycol	ethylacetate	0.75	0.25	20.629	14.4785	3	3
propyleneglycol	ethylacetate	0.65	0.35	17.923	13.0533	3	3
propyleneglycol	ethylacetate	0.56	0.44	15.752	12.0435	3	3
propyleneglycol	ethylacetate	0.5	0.5	14.374	11.4947	3	3
propyleneglycol	ethylacetate	0.45	0.55	13.316	11.0605	3	3
propyleneglycol	ethylacetate	0.35	0.65	11.359	10.3101	3	3
propyleneglycol	ethylacetate	0.25	0.75	9.658	9.7103	2	2
propyleneglycol	ethylacetate	0.15	0.85	8.112	9.2146	2	2
propyleneglycol	ethylacetate	0.05	0.95	6.704	8.7813	2	2
propyleneglycol	ethylacetate	0	1	5.99	8.5634	2	2
2-methoxyethanol	methylmethacrylate	1	0	17.011	16.4397	3	3
2-methoxyethanol	methylmethacrylate	0.94	0.06	16.303	15.2835	3	3
2-methoxyethanol	methylmethacrylate	0.85	0.15	15.031	13.5912	3	3
2-methoxyethanol	methylmethacrylate	0.74	0.26	13.722	12.2204	3	3
2-methoxyethanol	methylmethacrylate	0.65	0.35	12.484	11.2097	3	3
2-methoxyethanol	methylmethacrylate	0.54	0.46	11.265	10.319	3	3
2-methoxyethanol	methylmethacrylate	0.5	0.5	10.778	10.0006	3	3
2-methoxyethanol	methylmethacrylate	0.45	0.55	10.194	9.6432	3	2
2-methoxyethanol	methylmethacrylate	0.35	0.65	9.176	9.0727	2	2
2-methoxyethanol	methylmethacrylate	0.25	0.75	8.281	8.6232	2	2
2-methoxyethanol	methylmethacrylate	0.15	0.85	7.498	8.2468	2	2
2-methoxyethanol	methylmethacrylate	0.05	0.95	6.812	7.9349	2	2
2-methoxyethanol	methylmethacrylate	0	1	6.533	7.8078	2	2
2-methoxyethanol	benzene	1	0	17.65	16.4422	3	3
2-methoxyethanol	benzene	0.89	0.11	14.35	12.4644	3	3
2-methoxyethanol	benzene	0.77	0.23	12.12	9.2838	3	2
2-methoxyethanol	benzene	0.65	0.35	9.81	6.7889	2	2
2-methoxyethanol	benzene	0.53	0.47	7.69	4.9326	2	2
2-methoxyethanol	benzene	0.41	0.59	5.89	3.5653	2	2
2-methoxyethanol	benzene	0.28	0.72	4.38	2.6719	2	1
2-methoxyethanol	benzene	0.14	0.86	3.24	2.1635	1	1
2-methoxyethanol	benzene	0	1	2.28	2	1	1
propyleneglycol	n-butylacetate	1	0	28.373	20.0068	3	3
propyleneglycol	n-butylacetate	0.96	0.04	26.269	18.5164	3	3
propyleneglycol	n-butylacetate	0.85	0.15	21.899	15.6531	3	3
propyleneglycol	n-butylacetate	0.75	0.25	18.412	13.5851	3	3
propyleneglycol	n-butylacetate	0.65	0.35	15.381	11.9939	3	3
propyleneglycol	n-butylacetate	0.55	0.45	13.007	10.7779	3	3
propyleneglycol	n-butylacetate	0.5	0.5	11.878	10.225	3	3
propyleneglycol	n-butylacetate	0.45	0.55	10.837	9.7282	3	2
propyleneglycol	n-butylacetate	0.35	0.65	9.058	8.9047	2	2
propyleneglycol	n-butylacetate	0.25	0.75	7.616	8.2628	2	2
propyleneglycol	n-butylacetate	0.15	0.85	6.418	7.7079	2	2
propyleneglycol	n-butylacetate	0.05	0.95	5.456	7.243	2	2
propyleneglycol	n-butylacetate	0	1	5.001	7.0009	2	2
propyleneglycol	isoamylacetate	1	0	28.373	20.0112	3	3
propyleneglycol	isoamylacetate	0.95	0.05	26.057	18.3734	3	3
propyleneglycol	isoamylacetate	0.85	0.15	21.589	15.4572	3	3
propyleneglycol	isoamylacetate	0.75	0.25	17.773	13.215	3	3
propyleneglycol	isoamylacetate	0.65	0.35	14.6	11.5672	3	3
propyleneglycol	isoamylacetate	0.55	0.45	12.009	10.2539	3	3
propyleneglycol	isoamylacetate	0.5	0.5	11.038	9.7775	3	2
propyleneglycol	isoamylacetate	0.44	0.56	9.864	9.208	2	2
propyleneglycol	isoamylacetate	0.35	0.65	8.255	8.4229	2	2
propyleneglycol	isoamylacetate	0.25	0.75	7.014	7.7956	2	2
propyleneglycol	isoamylacetate	0.15	0.85	6.098	7.2461	2	2
propyleneglycol	isoamylacetate	0.06	0.94	5.548	6.8099	2	2
propyleneglycol	isoamylacetate	0	1	5.346	6.5629	2	2
2-methoxyethanol	1-butoxy-2-propanol	1	0	16.59	16.2279	3	3
2-methoxyethanol	1-butoxy-2-propanol	0.97	0.03	16.05	15.8294	3	3
2-methoxyethanol	1-butoxy-2-propanol	0.95	0.05	15.53	15.5598	3	3
2-methoxyethanol	1-butoxy-2-propanol	0.93	0.07	15.02	15.1919	3	3
2-methoxyethanol	1-butoxy-2-propanol	0.9	0.1	14.53	14.8419	3	3
2-methoxyethanol	1-butoxy-2-propanol	0.88	0.12	14.06	14.5087	3	3
2-methoxyethanol	1-butoxy-2-propanol	0.8	0.2	12.71	13.5981	3	3
2-methoxyethanol	1-butoxy-2-propanol	0.7	0.3	11.11	12.5591	3	3
2-methoxyethanol	1-butoxy-2-propanol	0.65	0.35	10.4	12.1112	3	3
2-methoxyethanol	1-butoxy-2-propanol	0.6	0.4	9.72	11.6789	2	3
2-methoxyethanol	1-butoxy-2-propanol	0.5	0.5	8.53	10.9235	2	3
2-methoxyethanol	1-butoxy-2-propanol	0.4	0.6	7.55	10.296	2	3
2-methoxyethanol	1-butoxy-2-propanol	0.3	0.7	6.78	9.7121	2	2
2-methoxyethanol	1-butoxy-2-propanol	0.2	0.8	6.05	9.1921	2	2
2-methoxyethanol	1-butoxy-2-propanol	0.1	0.9	5.54	8.7336	2	2
2-methoxyethanol	1-butoxy-2-propanol	0.05	0.95	5.31	8.498	2	2
2-methoxyethanol	1-butoxy-2-propanol	0	1	5.13	8.2783	2	2
2-methoxyethanol	dipropyleneglycolmonomethylether	1	0	16.96	16.2731	3	3
2-methoxyethanol	dipropyleneglycolmonomethylether	0.95	0.05	16.37	15.2583	3	3
2-methoxyethanol	dipropyleneglycolmonomethylether	0.9	0.1	15.79	14.3516	3	3
2-methoxyethanol	dipropyleneglycolmonomethylether	0.85	0.15	15.28	13.5341	3	3
2-methoxyethanol	dipropyleneglycolmonomethylether	0.8	0.2	14.78	12.8018	3	3
2-methoxyethanol	dipropyleneglycolmonomethylether	0.75	0.25	14.32	12.1298	3	3
2-methoxyethanol	dipropyleneglycolmonomethylether	0.7	0.3	13.91	11.5276	3	3
2-methoxyethanol	dipropyleneglycolmonomethylether	0.65	0.35	13.52	10.9726	3	3
2-methoxyethanol	dipropyleneglycolmonomethylether	0.6	0.4	13.16	10.4636	3	3
2-methoxyethanol	dipropyleneglycolmonomethylether	0.55	0.45	12.83	10.0053	3	3
2-methoxyethanol	dipropyleneglycolmonomethylether	0.5	0.5	12.52	9.5635	3	2
2-methoxyethanol	dipropyleneglycolmonomethylether	0.45	0.55	12.23	9.1625	3	2
2-methoxyethanol	dipropyleneglycolmonomethylether	0.4	0.6	11.96	8.7937	3	2
2-methoxyethanol	dipropyleneglycolmonomethylether	0.35	0.65	11.71	8.4757	3	2
2-methoxyethanol	dipropyleneglycolmonomethylether	0.3	0.7	11.47	8.1597	3	2
2-methoxyethanol	dipropyleneglycolmonomethylether	0.25	0.75	11.25	7.86	3	2
2-methoxyethanol	dipropyleneglycolmonomethylether	0.2	0.8	11.05	7.5843	3	2
2-methoxyethanol	dipropyleneglycolmonomethylether	0.15	0.85	10.84	7.3172	3	2
2-methoxyethanol	dipropyleneglycolmonomethylether	0.1	0.9	10.69	7.0699	3	2
2-methoxyethanol	dipropyleneglycolmonomethylether	0.05	0.95	10.54	6.8384	3	2
2-methoxyethanol	dipropyleneglycolmonomethylether	0	1	10.4	6.6205	3	2
glycerol	ethoxyethanol	1	0	44.06	38.3415	4	4
glycerol	ethoxyethanol	0.9	0.1	45.06	35.4584	4	4
glycerol	ethoxyethanol	0.79	0.21	40.75	32.5377	4	3
glycerol	ethoxyethanol	0.68	0.32	35.97	29.5638	4	3
glycerol	ethoxyethanol	0.56	0.44	31.2	26.5726	3	3
glycerol	ethoxyethanol	0.43	0.56	26.63	23.5221	3	3
glycerol	ethoxyethanol	0.3	0.7	21.96	20.3974	3	3
glycerol	ethoxyethanol	0.15	0.84	17.88	17.2266	3	3
glycerol	ethoxyethanol	0	1	13.94	13.95	3	3
glycerol	2-butoxyethanol	1	0	44.06	38.3215	4	4
glycerol	2-butoxyethanol	0.92	0.08	43.3	35.4434	4	4
glycerol	2-butoxyethanol	0.84	0.16	37.48	32.5321	4	3
glycerol	2-butoxyethanol	0.74	0.26	31.61	29.5747	3	3
glycerol	2-butoxyethanol	0.64	0.36	26.38	26.5983	3	3
glycerol	2-butoxyethanol	0.51	0.49	21.61	23.5341	3	3
glycerol	2-butoxyethanol	0.37	0.63	17.16	20.4315	3	3
glycerol	2-butoxyethanol	0.2	0.8	13.48	17.2123	3	3
glycerol	2-butoxyethanol	0	1	9.87	13.8348	2	3
butanone	n-formylmorpholine	1	0	17.37	19.0942	3	3
butanone	n-formylmorpholine	0.95	0.05	17.45	18.9042	3	3
butanone	n-formylmorpholine	0.91	0.09	17.71	18.7359	3	3
butanone	n-formylmorpholine	0.82	0.18	17.86	18.3966	3	3
butanone	n-formylmorpholine	0.72	0.28	17.69	18.0561	3	3
butanone	n-formylmorpholine	0.61	0.39	17.62	17.7135	3	3
butanone	n-formylmorpholine	0.51	0.49	17.21	17.3885	3	3
butanone	n-formylmorpholine	0.41	0.59	16.87	17.094	3	3
butanone	n-formylmorpholine	0.31	0.69	16.54	16.8358	3	3
butanone	n-formylmorpholine	0.21	0.79	16.13	16.5732	3	3
butanone	n-formylmorpholine	0.11	0.89	15.6	16.328	3	3
butanone	n-formylmorpholine	0.04	0.96	15.22	16.1735	3	3
butanone	n-formylmorpholine	0	1	14.95	16.0718	3	3
dioxane	diethyleneglycol	0.94	0.06	3.1	2.0555	1	1
dioxane	diethyleneglycol	0.9	0.1	3.632	2.1524	2	1
dioxane	diethyleneglycol	0.88	0.12	3.926	2.219	2	1
ethylacetate	n-formylmorpholine	1	0	6.05	8.5634	2	2
ethylacetate	n-formylmorpholine	0.95	0.05	6.53	8.8967	2	2
ethylacetate	n-formylmorpholine	0.91	0.09	6.94	9.1779	2	2
ethylacetate	n-formylmorpholine	0.85	0.15	7.52	9.58	2	2
ethylacetate	n-formylmorpholine	0.8	0.2	8.06	9.948	2	2
ethylacetate	n-formylmorpholine	0.7	0.3	9.05	10.6381	2	3
ethylacetate	n-formylmorpholine	0.61	0.39	10	11.308	2	3
ethylacetate	n-formylmorpholine	0.53	0.47	10.84	11.9073	3	3
ethylacetate	n-formylmorpholine	0.41	0.59	12.05	12.8118	3	3
ethylacetate	n-formylmorpholine	0.32	0.68	12.9	13.4853	3	3
ethylacetate	n-formylmorpholine	0.21	0.79	13.95	14.3845	3	3
ethylacetate	n-formylmorpholine	0.15	0.85	14.33	14.8322	3	3
ethylacetate	n-formylmorpholine	0.11	0.89	14.6	15.1721	3	3
ethylacetate	n-formylmorpholine	0.05	0.95	14.81	15.645	3	3
ethylacetate	n-formylmorpholine	0	1	14.95	16.0718	3	3
dioxane	cyclohexanol	0.94	0.06	2.682	2.0214	1	1
dioxane	cyclohexanol	0.9	0.1	2.89	2.0581	1	1
dioxane	cyclohexanol	0.88	0.12	3.016	2.0834	1	1
1-butanol	pyridine	1	0	17.22	18.4743	3	3
1-butanol	pyridine	0.9	0.1	15.73	15.4704	3	3
1-butanol	pyridine	0.8	0.2	15.12	13.4041	3	3
1-butanol	pyridine	0.7	0.3	14.53	12.1183	3	3
1-butanol	pyridine	0.6	0.4	14.23	11.3518	3	3
1-butanol	pyridine	0.5	0.5	13.93	10.9504	3	3
1-butanol	pyridine	0.4	0.6	13.49	10.901	3	3
1-butanol	pyridine	0.3	0.7	12.89	11.1163	3	3
1-butanol	pyridine	0.2	0.8	12.71	11.5587	3	3
1-butanol	pyridine	0.1	0.9	12.38	12.1867	3	3
1-butanol	pyridine	0	1	12.02	12.9365	3	3
1-butanol	methylmethacrylate	1	0	17.402	18.572	3	3
1-butanol	methylmethacrylate	0.95	0.05	16.899	16.8994	3	3
1-butanol	methylmethacrylate	0.85	0.15	15.49	14.368	3	3
1-butanol	methylmethacrylate	0.75	0.25	13.803	12.5554	3	3
1-butanol	methylmethacrylate	0.65	0.35	12.074	11.2057	3	3
1-butanol	methylmethacrylate	0.55	0.45	10.519	10.1992	3	3
1-butanol	methylmethacrylate	0.5	0.5	9.828	9.7802	2	2
1-butanol	methylmethacrylate	0.45	0.55	9.3	9.4634	2	2
1-butanol	methylmethacrylate	0.36	0.64	8.415	8.9236	2	2
1-butanol	methylmethacrylate	0.26	0.74	7.787	8.4828	2	2
1-butanol	methylmethacrylate	0.15	0.85	7.326	8.1432	2	2
1-butanol	methylmethacrylate	0.05	0.95	6.878	7.9092	2	2
1-butanol	methylmethacrylate	0	1	6.533	7.8078	2	2
2-butanol	methylmethacrylate	1	0	15.946	17.376	3	3
2-butanol	methylmethacrylate	0.94	0.06	15.329	15.6903	3	3
2-butanol	methylmethacrylate	0.84	0.16	14.072	13.6116	3	3
2-butanol	methylmethacrylate	0.74	0.26	12.589	12.0351	3	3
2-butanol	methylmethacrylate	0.64	0.36	11.097	10.8967	3	3
2-butanol	methylmethacrylate	0.54	0.46	9.738	10.0087	2	3
2-butanol	methylmethacrylate	0.5	0.5	9.177	9.6722	2	2
2-butanol	methylmethacrylate	0.44	0.56	8.581	9.3231	2	2
2-butanol	methylmethacrylate	0.34	0.66	7.709	8.806	2	2
2-butanol	methylmethacrylate	0.24	0.76	7.11	8.4083	2	2
2-butanol	methylmethacrylate	0.15	0.85	6.756	8.1079	2	2
2-butanol	methylmethacrylate	0.05	0.95	6.581	7.8879	2	2
2-butanol	methylmethacrylate	0	1	6.533	7.8078	2	2
diethylether	methylmethacrylate	1	0	4.191	4.8849	2	2
diethylether	methylmethacrylate	0.95	0.05	4.317	5.009	2	2
diethylether	methylmethacrylate	0.85	0.15	4.61	5.2858	2	2
diethylether	methylmethacrylate	0.75	0.25	4.896	5.5612	2	2
diethylether	methylmethacrylate	0.65	0.35	5.168	5.8434	2	2
diethylether	methylmethacrylate	0.54	0.46	5.418	6.1479	2	2
diethylether	methylmethacrylate	0.5	0.5	5.518	6.2698	2	2
diethylether	methylmethacrylate	0.46	0.54	5.647	6.4039	2	2
diethylether	methylmethacrylate	0.35	0.65	5.862	6.7239	2	2
diethylether	methylmethacrylate	0.25	0.75	6.055	7.0278	2	2
diethylether	methylmethacrylate	0.15	0.85	6.238	7.3431	2	2
diethylether	methylmethacrylate	0.06	0.94	6.426	7.6292	2	2
diethylether	methylmethacrylate	0	1	6.534	7.8078	2	2
isobutanol	methylmethacrylate	1	0	16.775	18.2679	3	3
isobutanol	methylmethacrylate	0.95	0.05	16.11	16.5165	3	3
isobutanol	methylmethacrylate	0.86	0.14	14.862	14.4204	3	3
isobutanol	methylmethacrylate	0.77	0.23	13.344	12.724	3	3
isobutanol	methylmethacrylate	0.67	0.33	11.709	11.3798	3	3
isobutanol	methylmethacrylate	0.54	0.46	9.779	10.1137	2	3
isobutanol	methylmethacrylate	0.5	0.5	9.19	9.7844	2	2
isobutanol	methylmethacrylate	0.46	0.54	8.73	9.5115	2	2
isobutanol	methylmethacrylate	0.35	0.65	7.678	8.8715	2	2
isobutanol	methylmethacrylate	0.27	0.73	7.204	8.5467	2	2
isobutanol	methylmethacrylate	0.16	0.84	6.769	8.1646	2	2
isobutanol	methylmethacrylate	0.07	0.93	6.603	7.9351	2	2
isobutanol	methylmethacrylate	0	1	6.533	7.8078	2	2
tert-butanol	methylmethacrylate	1	0	12.34	16.0636	3	3
tert-butanol	methylmethacrylate	0.94	0.06	11.915	14.7087	3	3
tert-butanol	methylmethacrylate	0.84	0.16	10.951	12.8406	3	3
tert-butanol	methylmethacrylate	0.74	0.26	9.904	11.5131	2	3
tert-butanol	methylmethacrylate	0.64	0.36	8.832	10.4736	2	3
tert-butanol	methylmethacrylate	0.54	0.46	7.927	9.7195	2	2
tert-butanol	methylmethacrylate	0.5	0.5	7.588	9.4483	2	2
tert-butanol	methylmethacrylate	0.44	0.56	7.183	9.1196	2	2
tert-butanol	methylmethacrylate	0.34	0.66	6.673	8.6597	2	2
tert-butanol	methylmethacrylate	0.24	0.76	6.604	8.3139	2	2
tert-butanol	methylmethacrylate	0.15	0.85	6.348	8.0782	2	2
tert-butanol	methylmethacrylate	0.04	0.96	6.457	7.8708	2	2
tert-butanol	methylmethacrylate	0	1	6.533	7.8078	2	2
1-butanol	hexane	1	0	17.15	18.5755	3	3
1-butanol	hexane	0.93	0.07	15.46	15.0436	3	3
1-butanol	hexane	0.85	0.15	13.56	11.839	3	3
1-butanol	hexane	0.73	0.27	10.77	8.074	3	2
1-butanol	hexane	0.68	0.32	9.42	6.8518	2	2
1-butanol	hexane	0.65	0.35	8.76	6.2972	2	2
1-butanol	hexane	0.58	0.42	7.4	5.2237	2	2
1-butanol	hexane	0.49	0.51	5.47	3.966	2	2
1-butanol	hexane	0.47	0.53	5.25	3.8125	2	2
1-butanol	hexane	0.44	0.56	4.78	3.5619	2	2
1-butanol	hexane	0.32	0.68	3.16	2.6827	1	1
1-butanol	hexane	0.27	0.73	2.76	2.47	1	1
1-butanol	hexane	0.22	0.78	2.44	2.2903	1	1
1-butanol	hexane	0.15	0.85	2.17	2.1285	1	1
1-butanol	hexane	0.08	0.92	1.99	2.0293	1	1
1-butanol	hexane	0	1	1.89	2	1	1
1-butanol	octane	1	0	17.15	18.5732	3	3
1-butanol	octane	0.95	0.05	16.03	15.6875	3	3
1-butanol	octane	0.9	0.1	14.49	13.1935	3	3
1-butanol	octane	0.8	0.2	11.65	9.4048	3	2
1-butanol	octane	0.7	0.3	9.09	6.7997	2	2
1-butanol	octane	0.6	0.4	6.75	4.9294	2	2
1-butanol	octane	0.49	0.51	4.89	3.6932	2	2
1-butanol	octane	0.4	0.6	3.64	2.9511	2	1
1-butanol	octane	0.29	0.71	2.77	2.4377	1	1
1-butanol	octane	0.19	0.81	2.33	2.1682	1	1
1-butanol	octane	0.1	0.9	2.08	2.0359	1	1
1-butanol	octane	0.06	0.94	2.04	2.0155	1	1
1-butanol	octane	0	1	1.95	2	1	1
1-butanol	ethylsilicate	1	0	17.46	18.1036	3	3
1-butanol	ethylsilicate	1	0	16.77	17.7482	3	3
1-butanol	ethylsilicate	0.99	0.01	17.24	17.4292	3	3
1-butanol	ethylsilicate	0.98	0.02	16.76	16.4514	3	3
1-butanol	ethylsilicate	0.96	0.04	15.93	14.9117	3	3
1-butanol	ethylsilicate	0.92	0.08	14.08	12.1799	3	3
1-butanol	ethylsilicate	0.87	0.13	22.69	9.8011	3	2
1-butanol	ethylsilicate	0.81	0.19	11	7.7365	3	2
1-butanol	ethylsilicate	0.74	0.26	9.5	6.1133	2	2
ethoxyethanol	methylmethacrylate	1	0	13.219	13.8435	3	3
ethoxyethanol	methylmethacrylate	0.95	0.05	12.923	13.0628	3	3
ethoxyethanol	methylmethacrylate	0.85	0.15	12.303	11.8438	3	3
ethoxyethanol	methylmethacrylate	0.75	0.25	11.679	10.9583	3	3
ethoxyethanol	methylmethacrylate	0.64	0.36	10.901	10.1409	3	3
ethoxyethanol	methylmethacrylate	0.54	0.46	10.163	9.5786	3	2
ethoxyethanol	methylmethacrylate	0.5	0.5	9.328	9.3527	2	2
ethoxyethanol	methylmethacrylate	0.45	0.55	9.423	9.1011	2	2
ethoxyethanol	methylmethacrylate	0.35	0.65	8.689	8.7131	2	2
ethoxyethanol	methylmethacrylate	0.25	0.75	7.988	8.4066	2	2
ethoxyethanol	methylmethacrylate	0.11	0.89	7.153	8.0684	2	2
ethoxyethanol	methylmethacrylate	0.05	0.95	6.792	7.9167	2	2
ethoxyethanol	methylmethacrylate	0	1	6.533	7.8078	2	2
ethoxyethanol	benzene	1	0	13.94	13.8449	3	3
ethoxyethanol	benzene	0.87	0.13	11.47	10.3361	3	3
ethoxyethanol	benzene	0.74	0.26	9.76	7.6318	2	2
ethoxyethanol	benzene	0.61	0.39	7.92	5.6233	2	2
ethoxyethanol	benzene	0.48	0.52	6.36	4.1829	2	2
ethoxyethanol	benzene	0.36	0.64	5.05	3.1535	2	1
ethoxyethanol	benzene	0.24	0.76	4	2.4897	2	1
ethoxyethanol	benzene	0.12	0.88	3.04	2.1193	1	1
ethoxyethanol	benzene	0	1	2.28	2	1	1
n-formylmorpholine	benzene	1	0	15.47	16.0718	3	3
n-formylmorpholine	benzene	0.95	0.05	14.79	14.8491	3	3
n-formylmorpholine	benzene	0.9	0.1	14.12	13.663	3	3
n-formylmorpholine	benzene	0.79	0.21	13.03	11.2797	3	3
n-formylmorpholine	benzene	0.69	0.31	11.85	9.2087	3	2
n-formylmorpholine	benzene	0.62	0.38	10.89	7.8373	3	2
n-formylmorpholine	benzene	0.49	0.51	9.25	5.8479	2	2
n-formylmorpholine	benzene	0.39	0.61	7.75	4.4688	2	2
n-formylmorpholine	benzene	0.3	0.7	6.55	3.5406	2	2
n-formylmorpholine	benzene	0.19	0.81	4.95	2.6312	2	1
n-formylmorpholine	benzene	0.09	0.91	3.61	2.1515	2	1
n-formylmorpholine	benzene	0	1	2.28	2	1	1
n-formylmorpholine	toluene	1	0	15.47	16.0718	3	3
n-formylmorpholine	toluene	0.91	0.09	14.57	14.0202	3	3
n-formylmorpholine	toluene	0.8	0.2	12.94	11.7982	3	3
n-formylmorpholine	toluene	0.71	0.29	11.06	10.0007	3	3
n-formylmorpholine	toluene	0.64	0.36	9.75	8.7675	2	2
n-formylmorpholine	toluene	0.51	0.49	7.72	6.8701	2	2
n-formylmorpholine	toluene	0.41	0.59	6.18	5.5126	2	2
n-formylmorpholine	toluene	0.3	0.7	4.94	4.334	2	2
n-formylmorpholine	toluene	0.22	0.78	4.05	3.5786	2	2
n-formylmorpholine	toluene	0.1	0.9	2.81	2.755	1	1
n-formylmorpholine	toluene	0	1	2.36	2.2731	1	1
n-formylmorpholine	1,2-dimethylbenzene	1	0	15.47	16.0718	3	3
n-formylmorpholine	1,2-dimethylbenzene	0.9	0.1	13.54	13.9106	3	3
n-formylmorpholine	1,2-dimethylbenzene	0.8	0.2	11.86	11.9328	3	3
n-formylmorpholine	1,2-dimethylbenzene	0.71	0.29	10.51	10.2866	3	3
n-formylmorpholine	1,2-dimethylbenzene	0.6	0.4	9.07	8.5933	2	2
n-formylmorpholine	1,2-dimethylbenzene	0.5	0.5	7.8	7.2156	2	2
n-formylmorpholine	1,2-dimethylbenzene	0.4	0.6	6.68	6.03	2	2
n-formylmorpholine	1,2-dimethylbenzene	0.3	0.7	5.43	4.8938	2	2
n-formylmorpholine	1,2-dimethylbenzene	0.21	0.79	4.53	4.1251	2	2
n-formylmorpholine	1,2-dimethylbenzene	0.09	0.91	3.42	3.2675	1	1
n-formylmorpholine	1,2-dimethylbenzene	0	1	2.61	2.7609	1	1
n-formylmorpholine	1,3-dimethylbenzene	1	0	15.47	16.0718	3	3
n-formylmorpholine	1,3-dimethylbenzene	0.9	0.1	14.49	13.5818	3	3
n-formylmorpholine	1,3-dimethylbenzene	0.8	0.2	12.03	11.3033	3	3
n-formylmorpholine	1,3-dimethylbenzene	0.7	0.3	10.52	9.339	3	2
n-formylmorpholine	1,3-dimethylbenzene	0.61	0.39	9	7.712	2	2
n-formylmorpholine	1,3-dimethylbenzene	0.51	0.49	7.41	6.1772	2	2
n-formylmorpholine	1,3-dimethylbenzene	0.38	0.62	5.99	4.5851	2	2
n-formylmorpholine	1,3-dimethylbenzene	0.29	0.71	4.93	3.7148	2	2
n-formylmorpholine	1,3-dimethylbenzene	0.18	0.82	3.9	2.8816	2	1
n-formylmorpholine	1,3-dimethylbenzene	0.1	0.9	3.16	2.4644	1	1
n-formylmorpholine	1,3-dimethylbenzene	0	1	2.36	2.1285	1	1
n-formylmorpholine	1,4-dimethylbenzene	1	0	15.47	16.0718	3	3
n-formylmorpholine	1,4-dimethylbenzene	0.9	0.1	13.47	13.3233	3	3
n-formylmorpholine	1,4-dimethylbenzene	0.82	0.18	11.75	11.3467	3	3
n-formylmorpholine	1,4-dimethylbenzene	0.71	0.29	9.89	8.9678	2	2
n-formylmorpholine	1,4-dimethylbenzene	0.62	0.38	8.31	7.2632	2	2
n-formylmorpholine	1,4-dimethylbenzene	0.5	0.5	6.45	5.3958	2	2
n-formylmorpholine	1,4-dimethylbenzene	0.4	0.6	5.25	4.1684	2	2
n-formylmorpholine	1,4-dimethylbenzene	0.31	0.69	4.53	3.3052	2	1
n-formylmorpholine	1,4-dimethylbenzene	0.2	0.8	3.36	2.5415	1	1
n-formylmorpholine	1,4-dimethylbenzene	0.1	0.9	2.74	2.1348	1	1
n-formylmorpholine	1,4-dimethylbenzene	0	1	2.23	2	1	1
n-formylmorpholine	ethylbenzene	1	0	15.47	16.0718	3	3
n-formylmorpholine	ethylbenzene	0.9	0.1	14.36	13.7205	3	3
n-formylmorpholine	ethylbenzene	0.8	0.2	13.33	11.5146	3	3
n-formylmorpholine	ethylbenzene	0.7	0.3	10.81	9.6045	3	2
n-formylmorpholine	ethylbenzene	0.61	0.39	9.27	7.9943	2	2
n-formylmorpholine	ethylbenzene	0.52	0.48	7.48	6.6171	2	2
n-formylmorpholine	ethylbenzene	0.4	0.6	5.83	5.1383	2	2
n-formylmorpholine	ethylbenzene	0.34	0.66	4.87	4.4191	2	2
n-formylmorpholine	ethylbenzene	0.26	0.74	4.18	3.7288	2	2
n-formylmorpholine	ethylbenzene	0.2	0.8	3.59	3.248	2	1
n-formylmorpholine	ethylbenzene	0.12	0.88	2.96	2.7436	1	1
n-formylmorpholine	ethylbenzene	0	1	2.77	2.2365	1	1
n-formylmorpholine	1,3,5-trimethylbenzene	1	0	15.47	16.0718	3	3
n-formylmorpholine	1,3,5-trimethylbenzene	0.9	0.1	13.23	13.199	3	3
n-formylmorpholine	1,3,5-trimethylbenzene	0.8	0.2	11.23	10.7481	3	3
n-formylmorpholine	1,3,5-trimethylbenzene	0.73	0.27	9.96	9.1388	2	2
n-formylmorpholine	1,3,5-trimethylbenzene	0.6	0.4	7.81	6.8134	2	2
n-formylmorpholine	1,3,5-trimethylbenzene	0.5	0.5	7.34	5.3181	2	2
n-formylmorpholine	1,3,5-trimethylbenzene	0.41	0.59	5.57	4.2162	2	2
n-formylmorpholine	1,3,5-trimethylbenzene	0.29	0.71	4.7	3.1926	2	1
n-formylmorpholine	1,3,5-trimethylbenzene	0.2	0.8	4.14	2.5894	2	1
n-formylmorpholine	1,3,5-trimethylbenzene	0.1	0.9	3.02	2.1691	1	1
n-formylmorpholine	1,3,5-trimethylbenzene	0	1	2.24	2.0092	1	1
pentane	1-pentanol	1	0	1.818	2.0106	1	1
pentane	1-pentanol	0.95	0.05	1.879	2.0489	1	1
pentane	1-pentanol	0.9	0.1	1.974	2.1172	1	1
pentane	1-pentanol	0.79	0.21	2.421	2.3604	1	1
pentane	1-pentanol	0.69	0.31	3.332	2.7822	1	1
pentane	1-pentanol	0.58	0.42	4.707	3.4403	2	1
pentane	1-pentanol	0.49	0.51	6.217	4.2768	2	2
pentane	1-pentanol	0.4	0.6	7.857	5.4034	2	2
pentane	1-pentanol	0.29	0.71	9.81	7.1696	2	2
pentane	1-pentanol	0.19	0.81	11.429	9.1432	3	2
pentane	1-pentanol	0.14	0.86	12.294	10.3871	3	3
pentane	1-pentanol	0.1	0.9	13.101	11.6365	3	3
pentane	1-pentanol	0.05	0.95	14.072	13.1764	3	3
pentane	1-pentanol	0	1	15.558	14.823	3	3
pentane	1-hexanol	1	0	1.818	2.0106	1	1
pentane	1-hexanol	0.94	0.06	1.889	2.0537	1	1
pentane	1-hexanol	0.85	0.15	2.151	2.1982	1	1
pentane	1-hexanol	0.74	0.26	2.755	2.5348	1	1
pentane	1-hexanol	0.64	0.36	3.563	3.0188	2	1
pentane	1-hexanol	0.54	0.46	4.65	3.7303	2	2
pentane	1-hexanol	0.5	0.5	5.212	4.1355	2	2
pentane	1-hexanol	0.44	0.56	5.928	4.6816	2	2
pentane	1-hexanol	0.35	0.65	7.33	5.8698	2	2
pentane	1-hexanol	0.25	0.75	9.002	7.5309	2	2
pentane	1-hexanol	0.14	0.86	10.773	9.6094	3	2
pentane	1-hexanol	0.05	0.95	12.439	12.0309	3	3
pentane	1-hexanol	0	1	13.25	13.4536	3	3
pentane	1-heptanol	1	0	1.818	2.0106	1	1
pentane	1-heptanol	0.94	0.06	1.928	2.0508	1	1
pentane	1-heptanol	0.84	0.16	2.135	2.2109	1	1
pentane	1-heptanol	0.74	0.26	2.482	2.4895	1	1
pentane	1-heptanol	0.64	0.36	3.091	2.9186	1	1
pentane	1-heptanol	0.55	0.45	3.998	3.5132	2	2
pentane	1-heptanol	0.5	0.5	4.501	3.8392	2	2
pentane	1-heptanol	0.45	0.55	5.178	4.2864	2	2
pentane	1-heptanol	0.35	0.65	6.647	5.3245	2	2
pentane	1-heptanol	0.24	0.76	8.283	6.6754	2	2
pentane	1-heptanol	0.14	0.86	9.812	8.2757	2	2
pentane	1-heptanol	0.05	0.95	11.001	10.1629	3	3
pentane	1-heptanol	0	1	11.793	11.1986	3	3
pentane	1-octanol	1	0	1.818	2.0106	1	1
pentane	1-octanol	0.94	0.06	1.944	2.052	1	1
pentane	1-octanol	0.84	0.16	2.147	2.2091	1	1
pentane	1-octanol	0.74	0.26	2.493	2.4909	1	1
pentane	1-octanol	0.64	0.36	3.082	2.898	1	1
pentane	1-octanol	0.55	0.45	3.972	3.4542	2	1
pentane	1-octanol	0.5	0.5	4.493	3.7763	2	2
pentane	1-octanol	0.44	0.56	5.167	4.2	2	2
pentane	1-octanol	0.34	0.66	6.545	5.1432	2	2
pentane	1-octanol	0.25	0.75	7.904	6.2697	2	2
pentane	1-octanol	0.14	0.86	9.154	7.731	2	2
pentane	1-octanol	0.05	0.95	9.823	9.4286	2	2
pentane	1-octanol	0	1	9.858	10.3122	2	3
pentane	1-decanol	1	0	1.818	2.0106	1	1
pentane	1-decanol	0.94	0.06	1.946	2.0526	1	1
pentane	1-decanol	0.84	0.16	2.167	2.2	1	1
pentane	1-decanol	0.74	0.26	2.51	2.4555	1	1
pentane	1-decanol	0.64	0.36	3.052	2.8268	1	1
pentane	1-decanol	0.54	0.46	3.801	3.3125	2	1
pentane	1-decanol	0.5	0.5	4.189	3.5665	2	2
pentane	1-decanol	0.45	0.55	4.681	3.8983	2	2
pentane	1-decanol	0.34	0.66	5.731	4.6806	2	2
pentane	1-decanol	0.24	0.76	6.73	5.6291	2	2
pentane	1-decanol	0.14	0.86	7.487	6.7817	2	2
pentane	1-decanol	0.04	0.96	7.721	8.0404	2	2
pentane	1-decanol	0	1	7.6	8.6894	2	2
pentane	dodecanol	1	0	1.818	2.0106	1	1
pentane	dodecanol	0.94	0.06	1.923	2.0489	1	1
pentane	dodecanol	0.84	0.16	2.161	2.1869	1	1
pentane	dodecanol	0.75	0.25	2.478	2.4114	1	1
pentane	dodecanol	0.64	0.36	2.89	2.7346	1	1
pentane	dodecanol	0.54	0.46	3.365	3.1399	1	1
pentane	dodecanol	0.5	0.5	3.625	3.378	2	1
pentane	dodecanol	0.44	0.56	3.929	3.6746	2	2
pentane	dodecanol	0.35	0.65	4.512	4.2684	2	2
pentane	dodecanol	0.25	0.75	5.036	5.0101	2	2
pentane	dodecanol	0.15	0.85	5.527	5.8606	2	2
pentane	dodecanol	0.04	0.96	5.928	6.9486	2	2
pentane	dodecanol	0	1	6.274	7.4244	2	2
1-pentanol	hexane	1	0	15.13	14.8228	3	3
1-pentanol	hexane	0.92	0.08	12.4	11.8513	3	3
1-pentanol	hexane	0.83	0.17	11.55	9.2616	3	2
1-pentanol	hexane	0.78	0.22	10.7	8.1998	3	2
1-pentanol	hexane	0.74	0.26	9.76	7.2308	2	2
1-pentanol	hexane	0.64	0.36	7.87	5.5965	2	2
1-pentanol	hexane	0.6	0.4	6.93	4.9261	2	2
1-pentanol	hexane	0.55	0.45	6.02	4.33	2	2
1-pentanol	hexane	0.5	0.5	5.16	3.8217	2	2
1-pentanol	hexane	0.45	0.55	4.43	3.3992	2	1
1-pentanol	hexane	0.34	0.66	3.21	2.742	1	1
1-pentanol	hexane	0.29	0.71	2.78	2.4908	1	1
1-pentanol	hexane	0.23	0.77	2.47	2.3009	1	1
1-pentanol	hexane	0.12	0.88	2.2	2.0672	1	1
1-pentanol	hexane	0	1	1.89	2	1	1
benzene	ethylbutyrate	0.87	0.13	2.7098	2.1068	1	1
benzene	ethylbutyrate	0.8	0.2	2.9796	2.244	1	1
benzene	ethylbutyrate	0.7	0.3	3.1956	2.5248	1	1
benzene	ethylbutyrate	0.6	0.4	3.426	2.8949	1	1
benzene	ethylbutyrate	0.5	0.5	3.7008	3.3441	2	1
benzene	ethylbutyrate	0.4	0.6	3.9468	3.8637	2	2
benzene	ethylbutyrate	0.3	0.7	4.2708	4.4464	2	2
benzene	ethylbutyrate	0.2	0.8	4.5268	5.0858	2	2
benzene	2-butoxyethanol	1	0	2.271	2	1	1
benzene	2-butoxyethanol	0.94	0.06	2.887	2.0322	1	1
benzene	2-butoxyethanol	0.85	0.15	3.844	2.2331	2	1
benzene	2-butoxyethanol	0.75	0.25	4.746	2.6462	2	1
benzene	2-butoxyethanol	0.65	0.35	5.579	3.2922	2	1
benzene	2-butoxyethanol	0.54	0.46	6.36	4.2113	2	2
benzene	2-butoxyethanol	0.5	0.5	6.666	4.6762	2	2
benzene	2-butoxyethanol	0.45	0.55	7.006	5.2759	2	2
benzene	2-butoxyethanol	0.35	0.65	7.622	6.6083	2	2
benzene	2-butoxyethanol	0.25	0.75	8.231	8.3542	2	2
benzene	2-butoxyethanol	0.15	0.85	8.735	10.214	2	3
benzene	2-butoxyethanol	0.04	0.96	9.251	12.6717	2	3
benzene	2-butoxyethanol	0	1	9.446	13.8037	2	3
benzene	p-dimethoxybenzene	1	0	2.273	2	1	1
benzene	p-dimethoxybenzene	0.89	0.11	2.722	2.1304	1	1
benzene	p-dimethoxybenzene	0.81	0.19	3.048	2.3882	1	1
benzene	p-dimethoxybenzene	0.69	0.31	3.561	2.9229	2	1
benzene	di-n-butylether	1	0	2.271	2	1	1
benzene	di-n-butylether	0.95	0.05	2.37	2.0081	1	1
benzene	di-n-butylether	0.85	0.15	2.505	2.0547	1	1
benzene	di-n-butylether	0.75	0.25	2.61	2.1422	1	1
benzene	di-n-butylether	0.64	0.36	2.692	2.2668	1	1
benzene	di-n-butylether	0.55	0.45	2.752	2.4019	1	1
benzene	di-n-butylether	0.5	0.5	2.78	2.4836	1	1
benzene	di-n-butylether	0.45	0.55	2.807	2.5685	1	1
benzene	di-n-butylether	0.35	0.65	2.857	2.7412	1	1
benzene	di-n-butylether	0.25	0.75	2.914	2.9549	1	1
benzene	di-n-butylether	0.15	0.85	2.968	3.1647	1	1
benzene	di-n-butylether	0.05	0.95	3.017	3.3774	1	1
benzene	di-n-butylether	0	1	3.04	3.4911	1	1
benzene	ethylbenzoate	0.93	0.07	2.52	2.0389	1	1
benzene	ethylbenzoate	0.85	0.15	2.9382	2.1673	1	1
benzene	ethylbenzoate	0.77	0.23	3.3072	2.3724	1	1
benzene	ethylbenzoate	0.69	0.31	3.7588	2.6435	2	1
benzene	ethylbenzoate	0.59	0.41	4.3732	3.0617	2	1
benzene	ethylbenzoate	0.49	0.51	4.834	3.5549	2	2
benzene	ethylbenzoate	0.39	0.61	5.1156	4.112	2	2
benzene	ethylbenzoate	0.27	0.73	5.602	4.8521	2	2
cyclohexane	1-hexanol	1	0	2.01628	2	1	1
cyclohexane	1-hexanol	1	0	2.01754	2	1	1
cyclohexane	1-hexanol	1	0	2.01909	2	1	1
cyclohexane	1-hexanol	1	0	2.02077	2	1	1
cyclohexane	1-hexanol	1	0	2.02238	2	1	1
cyclohexane	1-hexanol	1	0	2.0241	2.0001	1	1
cyclohexane	1-hexanol	1	0	2.02616	2.0001	1	1
cyclohexane	1-hexanol	0.99	0.01	2.02846	2.0001	1	1
cyclohexane	1-hexanol	0.99	0.01	2.03086	2.0002	1	1
cyclohexane	1-hexanol	0.99	0.01	2.03338	2.0003	1	1
cyclohexane	1-hexanol	0.99	0.01	2.0363	2.0004	1	1
cyclohexane	1-hexanol	0.99	0.01	2.03907	2.0006	1	1
cyclohexane	1-hexanol	0.99	0.01	2.0424	2.0008	1	1
cyclohexane	1-hexanol	0.99	0.01	2.04539	2.0011	1	1
cyclohexane	1-hexanol	0.98	0.02	2.0495	2.0015	1	1
cyclohexane	1-hexanol	0.98	0.02	2.05385	2.002	1	1
cyclohexane	1-hexanol	0.98	0.02	2.05848	2.0027	1	1
cyclohexane	1-hexanol	0.97	0.03	2.06692	2.0041	1	1
cyclohexane	1-hexanol	0.97	0.03	2.07758	2.0065	1	1
cyclohexane	1-hexanol	0.96	0.04	2.09064	2.01	1	1
cyclohexane	1-hexanol	0.95	0.05	2.10533	2.0149	1	1
cyclohexane	1-hexanol	0.94	0.06	2.12135	2.021	1	1
cyclohexane	1-hexanol	0.93	0.07	2.13866	2.0285	1	1
cyclohexane	1-hexanol	0.92	0.08	2.16121	2.0393	1	1
cyclohexane	1-hexanol	0.91	0.09	2.18395	2.0513	1	1
cyclohexane	1-hexanol	0.89	0.11	2.20714	2.0645	1	1
cyclohexane	1-hexanol	0.88	0.12	2.23455	2.0808	1	1
cyclohexane	2-butoxyethanol	1	0	1.989	2	1	1
cyclohexane	2-butoxyethanol	0.94	0.06	2.372	2.0283	1	1
cyclohexane	2-butoxyethanol	0.85	0.15	3.018	2.2089	1	1
cyclohexane	2-butoxyethanol	0.75	0.25	3.704	2.5937	2	1
cyclohexane	2-butoxyethanol	0.65	0.35	4.419	3.2191	2	1
cyclohexane	2-butoxyethanol	0.55	0.45	5.08	4.0064	2	2
cyclohexane	2-butoxyethanol	0.5	0.5	5.461	4.554	2	2
cyclohexane	2-butoxyethanol	0.45	0.55	5.799	5.0943	2	2
cyclohexane	2-butoxyethanol	0.35	0.65	6.534	6.4321	2	2
cyclohexane	2-butoxyethanol	0.25	0.75	7.313	8.1084	2	2
cyclohexane	2-butoxyethanol	0.15	0.85	8.14	10.1418	2	3
cyclohexane	2-butoxyethanol	0.04	0.96	9.043	12.6221	2	3
cyclohexane	2-butoxyethanol	0	1	9.446	13.8036	2	3
cyclohexane	1-heptanol	1	0	2.0165	2	1	1
cyclohexane	1-heptanol	1	0	2.01783	2	1	1
cyclohexane	1-heptanol	1	0	2.01925	2	1	1
cyclohexane	1-heptanol	1	0	2.02065	2	1	1
cyclohexane	1-heptanol	1	0	2.02212	2	1	1
cyclohexane	1-heptanol	1	0	2.02398	2.0001	1	1
cyclohexane	1-heptanol	1	0	2.02598	2.0001	1	1
cyclohexane	1-heptanol	1	0	2.02805	2.0001	1	1
cyclohexane	1-heptanol	0.99	0.01	2.03017	2.0002	1	1
cyclohexane	1-heptanol	0.99	0.01	2.03168	2.0002	1	1
cyclohexane	1-heptanol	0.99	0.01	2.03421	2.0003	1	1
cyclohexane	1-heptanol	0.99	0.01	2.03709	2.0004	1	1
cyclohexane	1-heptanol	0.99	0.01	2.03997	2.0006	1	1
cyclohexane	1-heptanol	0.99	0.01	2.04403	2.0009	1	1
cyclohexane	1-heptanol	0.98	0.02	2.04934	2.0014	1	1
cyclohexane	1-heptanol	0.98	0.02	2.05388	2.0019	1	1
cyclohexane	1-heptanol	0.98	0.02	2.06156	2.003	1	1
cyclohexane	1-heptanol	0.97	0.03	2.07319	2.0052	1	1
cyclohexane	1-heptanol	0.96	0.04	2.08594	2.0083	1	1
cyclohexane	1-heptanol	0.95	0.05	2.10147	2.013	1	1
cyclohexane	1-heptanol	0.94	0.06	2.11891	2.0194	1	1
cyclohexane	1-heptanol	0.93	0.07	2.14061	2.0287	1	1
cyclohexane	1-heptanol	0.91	0.09	2.16251	2.0393	1	1
cyclohexane	1-heptanol	0.9	0.1	2.18548	2.0515	1	1
cyclohexane	1-heptanol	0.89	0.11	2.21418	2.0681	1	1
cyclohexane	1-octanol	1	0	2.01751	2	1	1
cyclohexane	1-octanol	1	0	2.01867	2	1	1
cyclohexane	1-octanol	1	0	2.01986	2	1	1
cyclohexane	1-octanol	1	0	2.02126	2	1	1
cyclohexane	1-octanol	1	0	2.02296	2	1	1
cyclohexane	1-octanol	1	0	2.02489	2.0001	1	1
cyclohexane	1-octanol	1	0	2.0269	2.0001	1	1
cyclohexane	1-octanol	0.99	0.01	2.02908	2.0002	1	1
cyclohexane	1-octanol	0.99	0.01	2.03147	2.0002	1	1
cyclohexane	1-octanol	0.99	0.01	2.03428	2.0003	1	1
cyclohexane	1-octanol	0.99	0.01	2.03774	2.0005	1	1
cyclohexane	1-octanol	0.99	0.01	2.04144	2.0007	1	1
cyclohexane	1-octanol	0.99	0.01	2.04542	2.001	1	1
cyclohexane	1-octanol	0.98	0.02	2.05048	2.0015	1	1
cyclohexane	1-octanol	0.98	0.02	2.05632	2.0022	1	1
cyclohexane	1-octanol	0.97	0.03	2.06504	2.0036	1	1
cyclohexane	1-octanol	0.97	0.03	2.07529	2.0057	1	1
cyclohexane	1-octanol	0.96	0.04	2.08758	2.0089	1	1
cyclohexane	1-octanol	0.95	0.05	2.10111	2.0131	1	1
cyclohexane	1-octanol	0.94	0.06	2.11602	2.0186	1	1
cyclohexane	1-octanol	0.93	0.07	2.13189	2.0254	1	1
cyclohexane	1-octanol	0.92	0.08	2.15059	2.0343	1	1
cyclohexane	1-octanol	0.91	0.09	2.16926	2.0442	1	1
cyclohexane	1-octanol	0.9	0.1	2.1891	2.0556	1	1
cyclohexane	1,3,5-trimethylbenzene	1	0	1.966	2	1	1
cyclohexane	1,3,5-trimethylbenzene	0.9	0.1	2.023	2.0001	1	1
cyclohexane	1,3,5-trimethylbenzene	0.8	0.2	2.036	2.0005	1	1
cyclohexane	1,3,5-trimethylbenzene	0.7	0.3	2.065	2.0011	1	1
cyclohexane	1,3,5-trimethylbenzene	0.6	0.4	2.106	2.0018	1	1
cyclohexane	1,3,5-trimethylbenzene	0.5	0.5	2.163	2.0027	1	1
cyclohexane	1,3,5-trimethylbenzene	0.4	0.6	2.177	2.0038	1	1
cyclohexane	1,3,5-trimethylbenzene	0.3	0.7	2.229	2.005	1	1
cyclohexane	1,3,5-trimethylbenzene	0.2	0.8	2.251	2.0062	1	1
cyclohexane	1,3,5-trimethylbenzene	0.1	0.9	2.254	2.0077	1	1
cyclohexane	1,3,5-trimethylbenzene	0	1	2.267	2.0092	1	1
cyclohexane	1-nonanol	1	0	2.01752	2	1	1
cyclohexane	1-nonanol	1	0	2.01929	2	1	1
cyclohexane	1-nonanol	1	0	2.02113	2	1	1
cyclohexane	1-nonanol	1	0	2.02311	2	1	1
cyclohexane	1-nonanol	1	0	2.02517	2.0001	1	1
cyclohexane	1-nonanol	1	0	2.02733	2.0001	1	1
cyclohexane	1-nonanol	0.99	0.01	2.03041	2.0002	1	1
cyclohexane	1-nonanol	0.99	0.01	2.0331	2.0003	1	1
cyclohexane	1-nonanol	0.99	0.01	2.0359	2.0004	1	1
cyclohexane	1-nonanol	0.99	0.01	2.03889	2.0005	1	1
cyclohexane	1-nonanol	0.99	0.01	2.04202	2.0007	1	1
cyclohexane	1-nonanol	0.99	0.01	2.0455	2.0009	1	1
cyclohexane	1-nonanol	0.98	0.02	2.04907	2.0013	1	1
cyclohexane	1-nonanol	0.98	0.02	2.05426	2.0018	1	1
cyclohexane	1-nonanol	0.98	0.02	2.06064	2.0027	1	1
cyclohexane	1-nonanol	0.97	0.03	2.06776	2.0039	1	1
cyclohexane	1-nonanol	0.97	0.03	2.07762	2.0059	1	1
cyclohexane	1-nonanol	0.96	0.04	2.08824	2.0086	1	1
cyclohexane	1-nonanol	0.95	0.05	2.10075	2.0124	1	1
cyclohexane	1-nonanol	0.94	0.06	2.11428	2.0172	1	1
cyclohexane	1-nonanol	0.93	0.07	2.13117	2.024	1	1
cyclohexane	1-nonanol	0.92	0.08	2.15023	2.0329	1	1
cyclohexane	1-nonanol	0.91	0.09	2.16984	2.0431	1	1
cyclohexane	1-nonanol	0.9	0.1	2.19089	2.055	1	1
cyclohexane	1-decanol	1	0	2.01653	2	1	1
cyclohexane	1-decanol	1	0	2.01723	2	1	1
cyclohexane	1-decanol	1	0	2.01796	2	1	1
cyclohexane	1-decanol	1	0	2.01906	2	1	1
cyclohexane	1-decanol	1	0	2.02011	2	1	1
cyclohexane	1-decanol	1	0	2.02126	2	1	1
cyclohexane	1-decanol	1	0	2.02247	2	1	1
cyclohexane	1-decanol	1	0	2.02399	2.0001	1	1
cyclohexane	1-decanol	1	0	2.0255	2.0001	1	1
cyclohexane	1-decanol	1	0	2.02723	2.0001	1	1
cyclohexane	1-decanol	0.99	0.01	2.02901	2.0001	1	1
cyclohexane	1-decanol	0.99	0.01	2.03037	2.0002	1	1
cyclohexane	1-decanol	0.99	0.01	2.0322	2.0002	1	1
cyclohexane	1-decanol	0.99	0.01	2.03322	2.0003	1	1
cyclohexane	1-decanol	0.99	0.01	2.03502	2.0003	1	1
cyclohexane	1-decanol	0.99	0.01	2.03634	2.0004	1	1
cyclohexane	1-decanol	0.99	0.01	2.03814	2.0005	1	1
cyclohexane	1-decanol	0.99	0.01	2.04287	2.0008	1	1
cyclohexane	1-decanol	0.99	0.01	2.04779	2.0012	1	1
cyclohexane	1-decanol	0.98	0.02	2.05371	2.0018	1	1
cyclohexane	1-decanol	0.98	0.02	2.06088	2.0028	1	1
cyclohexane	1-decanol	0.97	0.03	2.06773	2.004	1	1
cyclohexane	1-decanol	0.97	0.03	2.07577	2.0056	1	1
cyclohexane	1-decanol	0.96	0.04	2.0837	2.0076	1	1
cyclohexane	1-decanol	0.96	0.04	2.0928	2.0101	1	1
cyclohexane	1-decanol	0.95	0.05	2.10198	2.0131	1	1
cyclohexane	1-decanol	0.94	0.06	2.11172	2.0166	1	1
cyclohexane	1-decanol	0.94	0.06	2.12229	2.0208	1	1
cyclohexane	1-decanol	0.93	0.07	2.13372	2.0258	1	1
cyclohexane	1-decanol	0.92	0.08	2.14614	2.0318	1	1
cyclohexane	1-decanol	0.92	0.08	2.15923	2.0387	1	1
cyclohexane	1-decanol	0.91	0.09	2.17111	2.0453	1	1
1-hexanol	ethylsilicate	1	0	12.64	13.2036	3	3
1-hexanol	ethylsilicate	0.99	0.01	12.64	12.9163	3	3
1-hexanol	ethylsilicate	0.99	0.01	12.86	12.6582	3	3
1-hexanol	ethylsilicate	0.97	0.03	12.3	11.8683	3	3
1-hexanol	ethylsilicate	0.95	0.05	11.43	10.7339	3	3
1-hexanol	ethylsilicate	0.89	0.11	10.44	8.6646	3	2
1-hexanol	ethylsilicate	0.83	0.17	8.72	7.0253	2	2
1-hexanol	ethylsilicate	0.75	0.25	8.01	5.6307	2	2
1-hexanol	ethylsilicate	0.67	0.33	6.52	4.5419	2	2
toluene	di-n-butylether	1	0	2.408	2.2731	1	1
toluene	di-n-butylether	0.94	0.06	2.469	2.3232	1	1
toluene	di-n-butylether	0.85	0.15	2.554	2.4175	1	1
toluene	di-n-butylether	0.75	0.25	2.621	2.5223	1	1
toluene	di-n-butylether	0.65	0.35	2.68	2.6341	1	1
toluene	di-n-butylether	0.55	0.45	2.727	2.7559	1	1
toluene	di-n-butylether	0.5	0.5	2.761	2.8197	1	1
toluene	di-n-butylether	0.43	0.57	2.769	2.9055	1	1
toluene	di-n-butylether	0.37	0.63	2.848	2.9789	1	1
toluene	di-n-butylether	0.25	0.75	2.913	3.1423	1	1
toluene	di-n-butylether	0.15	0.85	2.971	3.2811	1	1
toluene	di-n-butylether	0.05	0.95	3.023	3.419	1	1
toluene	di-n-butylether	0	1	3.04	3.4911	1	1
n-heptane	1-heptanol	1	0	1.91717	2.0081	1	1
n-heptane	1-heptanol	1	0	1.9182	2.0082	1	1
n-heptane	1-heptanol	1	0	1.91937	2.0084	1	1
n-heptane	1-heptanol	1	0	1.92082	2.0087	1	1
n-heptane	1-heptanol	1	0	1.92251	2.0089	1	1
n-heptane	1-heptanol	1	0	1.92424	2.0092	1	1
n-heptane	1-heptanol	0.99	0.01	1.92603	2.0096	1	1
n-heptane	1-heptanol	0.99	0.01	1.9281	2.01	1	1
n-heptane	1-heptanol	0.99	0.01	1.9302	2.0104	1	1
n-heptane	1-heptanol	0.99	0.01	1.93287	2.011	1	1
n-heptane	1-heptanol	0.99	0.01	1.93566	2.0117	1	1
n-heptane	1-heptanol	0.99	0.01	1.93856	2.0126	1	1
n-heptane	1-heptanol	0.98	0.02	1.94229	2.0137	1	1
n-heptane	1-heptanol	0.98	0.02	1.94737	2.0154	1	1
n-heptane	1-heptanol	0.98	0.02	1.95355	2.0178	1	1
n-heptane	1-heptanol	0.97	0.03	1.96053	2.0208	1	1
n-heptane	1-heptanol	0.96	0.04	1.96759	2.024	1	1
n-heptane	1-heptanol	0.96	0.04	1.97659	2.0285	1	1
n-heptane	1-heptanol	0.95	0.05	1.9865	2.0339	1	1
n-heptane	1-heptanol	0.94	0.06	1.99856	2.041	1	1
n-heptane	1-heptanol	0.93	0.07	2.01185	2.0493	1	1
n-heptane	1-heptanol	0.92	0.08	2.02563	2.0586	1	1
n-heptane	1-heptanol	0.91	0.09	2.03945	2.0683	1	1
n-heptane	1-heptanol	0.9	0.1	2.05764	2.0817	1	1
n-heptane	1-heptanol	1	0	1.914	2.0078	1	1
n-heptane	1-octanol	1	0	1.914	2.0078	1	1
n-heptane	1-octanol	0.96	0.04	2.0469	2.0299	1	1
n-heptane	1-octanol	0.91	0.09	2.0959	2.0718	1	1
n-heptane	1-octanol	0.82	0.18	2.2546	2.2109	1	1
n-heptane	1-octanol	0.72	0.28	2.5425	2.4553	1	1
n-heptane	1-octanol	0.63	0.37	3.0297	2.8077	1	1
n-heptane	1-octanol	0.53	0.47	3.7297	3.3328	2	1
n-heptane	1-octanol	0.43	0.57	4.5406	4.0339	2	2
n-heptane	1-octanol	0.33	0.67	5.5726	5.0143	2	2
n-heptane	1-octanol	0.22	0.78	6.9721	6.3601	2	2
n-heptane	1-octanol	0.17	0.83	7.6696	7.1857	2	2
n-heptane	1-octanol	0.12	0.88	8.4012	8.0127	2	2
n-heptane	1-octanol	0.06	0.94	8.9687	9.0143	2	2
n-heptane	1-octanol	0	1	9.858	10.312	2	3
n-heptane	1,3,5-trimethylbenzene	1	0	1.881	2.0078	1	1
n-heptane	1,3,5-trimethylbenzene	0.9	0.1	1.939	2.0079	1	1
n-heptane	1,3,5-trimethylbenzene	0.8	0.2	2.002	2.0081	1	1
n-heptane	1,3,5-trimethylbenzene	0.7	0.3	2.03	2.0082	1	1
n-heptane	1,3,5-trimethylbenzene	0.6	0.4	2.073	2.0083	1	1
n-heptane	1,3,5-trimethylbenzene	0.5	0.5	2.113	2.0085	1	1
n-heptane	1,3,5-trimethylbenzene	0.4	0.6	2.131	2.0086	1	1
n-heptane	1,3,5-trimethylbenzene	0.3	0.7	2.174	2.0088	1	1
n-heptane	1,3,5-trimethylbenzene	0.2	0.8	2.214	2.0089	1	1
n-heptane	1,3,5-trimethylbenzene	0.1	0.9	2.235	2.009	1	1
n-heptane	1,3,5-trimethylbenzene	0	1	2.267	2.0092	1	1
n-heptane	1-nonanol	1	0	1.91639	2.0079	1	1
n-heptane	1-nonanol	1	0	1.91741	2.0081	1	1
n-heptane	1-nonanol	1	0	1.91843	2.0082	1	1
n-heptane	1-nonanol	1	0	1.91974	2.0084	1	1
n-heptane	1-nonanol	1	0	1.92133	2.0087	1	1
n-heptane	1-nonanol	1	0	1.92316	2.009	1	1
n-heptane	1-nonanol	0.99	0.01	1.92612	2.0095	1	1
n-heptane	1-nonanol	0.99	0.01	1.92827	2.0099	1	1
n-heptane	1-nonanol	0.99	0.01	1.93193	2.0106	1	1
n-heptane	1-nonanol	0.99	0.01	1.93474	2.0113	1	1
n-heptane	1-nonanol	0.99	0.01	1.93784	2.012	1	1
n-heptane	1-nonanol	0.99	0.01	1.94206	2.0132	1	1
n-heptane	1-nonanol	0.98	0.02	1.94693	2.0148	1	1
n-heptane	1-nonanol	0.98	0.02	1.954	2.0173	1	1
n-heptane	1-nonanol	0.97	0.03	1.96262	2.0207	1	1
n-heptane	1-nonanol	0.96	0.04	1.97229	2.025	1	1
n-heptane	1-nonanol	0.95	0.05	1.98269	2.0301	1	1
n-heptane	1-nonanol	0.95	0.05	1.99427	2.0363	1	1
n-heptane	1-nonanol	0.93	0.07	2.00777	2.0441	1	1
n-heptane	1-nonanol	0.92	0.08	2.02217	2.0531	1	1
n-heptane	1-nonanol	0.91	0.09	2.03648	2.0626	1	1
n-heptane	1-nonanol	0.9	0.1	2.05299	2.0742	1	1
n-heptane	1-nonanol	0.89	0.11	2.06692	2.0845	1	1
n-heptane	1-decanol	1	0	1.914	2.0078	1	1
n-heptane	1-decanol	0.96	0.04	1.9651	2.0258	1	1
n-heptane	1-decanol	0.92	0.08	2.006	2.0557	1	1
n-heptane	1-decanol	0.84	0.16	2.1368	2.1604	1	1
n-heptane	1-decanol	0.75	0.25	2.3576	2.3456	1	1
n-heptane	1-decanol	0.66	0.34	2.5752	2.6176	1	1
n-heptane	1-decanol	0.57	0.43	2.922	2.9869	1	1
n-heptane	1-decanol	0.47	0.53	3.5299	3.5697	2	2
n-heptane	1-decanol	0.36	0.64	4.3401	4.3147	2	2
n-heptane	1-decanol	0.25	0.75	5.238	5.3585	2	2
n-heptane	1-decanol	0.19	0.81	5.7147	5.9699	2	2
n-heptane	1-decanol	0.13	0.87	6.3716	6.7512	2	2
n-heptane	1-decanol	0.07	0.93	6.8842	7.6451	2	2
n-heptane	1-decanol	0	1	7.66	8.6892	2	2
n-heptane	dodecanol	1	0	1.914	2.0078	1	1
n-heptane	dodecanol	0.97	0.03	1.9978	2.0228	1	1
n-heptane	dodecanol	0.93	0.07	2.055	2.0468	1	1
n-heptane	dodecanol	0.86	0.14	2.1614	2.124	1	1
n-heptane	dodecanol	0.78	0.22	2.3086	2.2574	1	1
n-heptane	dodecanol	0.7	0.3	2.4803	2.4456	1	1
n-heptane	dodecanol	0.61	0.39	2.7502	2.7516	1	1
n-heptane	dodecanol	0.51	0.49	3.1428	3.1637	1	1
n-heptane	dodecanol	0.41	0.59	3.609	3.7265	2	2
n-heptane	dodecanol	0.28	0.72	3.752	4.6077	2	2
n-heptane	dodecanol	0.21	0.79	4.7116	5.1408	2	2
n-heptane	dodecanol	0.15	0.85	5.1872	5.7212	2	2
n-heptane	dodecanol	0.08	0.92	5.6643	6.5097	2	2
n-heptane	dodecanol	0	1	6.274	7.4243	2	2
1-butoxy-2-propanol	dipropyleneglycolmonomethylether	1	0	7.9	8.2809	2	2
1-butoxy-2-propanol	dipropyleneglycolmonomethylether	0.96	0.04	7.83	8.2216	2	2
1-butoxy-2-propanol	dipropyleneglycolmonomethylether	0.92	0.08	7.75	8.1598	2	2
1-butoxy-2-propanol	dipropyleneglycolmonomethylether	0.83	0.17	7.67	8.0284	2	2
1-butoxy-2-propanol	dipropyleneglycolmonomethylether	0.75	0.25	7.67	7.8869	2	2
1-butoxy-2-propanol	dipropyleneglycolmonomethylether	0.65	0.35	7.66	7.735	2	2
1-butoxy-2-propanol	dipropyleneglycolmonomethylether	0.56	0.44	7.75	7.575	2	2
1-butoxy-2-propanol	dipropyleneglycolmonomethylether	0.5	0.5	7.96	7.4789	2	2
1-butoxy-2-propanol	dipropyleneglycolmonomethylether	0.46	0.54	7.96	7.4051	2	2
1-butoxy-2-propanol	dipropyleneglycolmonomethylether	0.4	0.6	8.14	7.2847	2	2
1-butoxy-2-propanol	dipropyleneglycolmonomethylether	0.35	0.65	8.32	7.1998	2	2
1-butoxy-2-propanol	dipropyleneglycolmonomethylether	0.24	0.76	8.86	7.0099	2	2
1-butoxy-2-propanol	dipropyleneglycolmonomethylether	0.12	0.88	9.49	6.8119	2	2
1-butoxy-2-propanol	dipropyleneglycolmonomethylether	0.06	0.94	9.94	6.7098	2	2
1-butoxy-2-propanol	dipropyleneglycolmonomethylether	0.03	0.97	10.2	6.6478	3	2
1-butoxy-2-propanol	dipropyleneglycolmonomethylether	0	1	10.4	6.6061	3	2
dipropyleneglycolmonomethylether	dipropyleneglycoln-butylether	1	0	7.48	6.6038	2	2
dipropyleneglycolmonomethylether	dipropyleneglycoln-butylether	0.95	0.05	7.59	6.5802	2	2
dipropyleneglycolmonomethylether	dipropyleneglycoln-butylether	0.9	0.1	7.7	6.5552	2	2
dipropyleneglycolmonomethylether	dipropyleneglycoln-butylether	0.8	0.2	7.91	6.5013	2	2
dipropyleneglycolmonomethylether	dipropyleneglycoln-butylether	0.7	0.3	8.17	6.4433	2	2
dipropyleneglycolmonomethylether	dipropyleneglycoln-butylether	0.6	0.4	8.41	6.3821	2	2
dipropyleneglycolmonomethylether	dipropyleneglycoln-butylether	0.5	0.5	8.68	6.3188	2	2
dipropyleneglycolmonomethylether	dipropyleneglycoln-butylether	0.45	0.55	8.83	6.2859	2	2
dipropyleneglycolmonomethylether	dipropyleneglycoln-butylether	0.4	0.6	8.97	6.2542	2	2
dipropyleneglycolmonomethylether	dipropyleneglycoln-butylether	0.35	0.65	9.13	6.2215	2	2
dipropyleneglycolmonomethylether	dipropyleneglycoln-butylether	0.3	0.7	9.28	6.1888	2	2
dipropyleneglycolmonomethylether	dipropyleneglycoln-butylether	0.25	0.75	9.45	6.1559	2	2
dipropyleneglycolmonomethylether	dipropyleneglycoln-butylether	0.2	0.8	9.63	6.1256	2	2
dipropyleneglycolmonomethylether	dipropyleneglycoln-butylether	0.1	0.9	10	6.059	2	2
dipropyleneglycolmonomethylether	dipropyleneglycoln-butylether	0.05	0.95	10.19	6.0251	3	2
dipropyleneglycolmonomethylether	dipropyleneglycoln-butylether	0	1	10.4	5.9955	3	2
1,4-dimethylbenzene	di-n-butylether	1	0	2.268	2	1	1
1,4-dimethylbenzene	di-n-butylether	0.94	0.06	2.31	2.0061	1	1
1,4-dimethylbenzene	di-n-butylether	0.85	0.15	2.388	2.0435	1	1
1,4-dimethylbenzene	di-n-butylether	0.75	0.25	2.47	2.1145	1	1
1,4-dimethylbenzene	di-n-butylether	0.65	0.35	2.552	2.2161	1	1
1,4-dimethylbenzene	di-n-butylether	0.55	0.45	2.634	2.3505	1	1
1,4-dimethylbenzene	di-n-butylether	0.5	0.5	2.676	2.429	1	1
1,4-dimethylbenzene	di-n-butylether	0.43	0.57	2.728	2.5423	1	1
1,4-dimethylbenzene	di-n-butylether	0.37	0.63	2.77	2.6456	1	1
1,4-dimethylbenzene	di-n-butylether	0.25	0.75	2.859	2.8935	1	1
1,4-dimethylbenzene	di-n-butylether	0.15	0.85	2.931	3.1213	1	1
1,4-dimethylbenzene	di-n-butylether	0.05	0.95	3.002	3.3609	1	1
1,4-dimethylbenzene	di-n-butylether	0	1	3.04	3.4911	1	1
octane	1,3,5-trimethylbenzene	1	0	1.908	2	1	1
octane	1,3,5-trimethylbenzene	0.9	0.1	1.973	2.0001	1	1
octane	1,3,5-trimethylbenzene	0.8	0.2	2.009	2.0004	1	1
octane	1,3,5-trimethylbenzene	0.7	0.3	2.016	2.0008	1	1
octane	1,3,5-trimethylbenzene	0.6	0.4	2.03	2.0014	1	1
octane	1,3,5-trimethylbenzene	0.5	0.5	2.079	2.0022	1	1
octane	1,3,5-trimethylbenzene	0.4	0.6	2.107	2.0032	1	1
octane	1,3,5-trimethylbenzene	0.3	0.7	2.148	2.0044	1	1
octane	1,3,5-trimethylbenzene	0.2	0.8	2.168	2.0058	1	1
octane	1,3,5-trimethylbenzene	0.1	0.9	2.247	2.0074	1	1
octane	1,3,5-trimethylbenzene	0	1	2.267	2.0092	1	1
n-nonane	2,5,8,11,14-pentaoxapentadecane	1	0	1.98	2.0062	1	1
n-nonane	2,5,8,11,14-pentaoxapentadecane	0.9	0.1	2.38	2.0525	1	1
n-nonane	2,5,8,11,14-pentaoxapentadecane	0.79	0.21	2.87	2.1475	1	1
n-nonane	2,5,8,11,14-pentaoxapentadecane	0.76	0.24	3.05	2.1896	1	1
n-nonane	2,5,8,11,14-pentaoxapentadecane	0.71	0.29	3.3	2.2529	1	1
n-nonane	2,5,8,11,14-pentaoxapentadecane	0.6	0.4	3.86	2.411	2	1
n-nonane	2,5,8,11,14-pentaoxapentadecane	0.51	0.49	4.41	2.588	2	1
n-nonane	2,5,8,11,14-pentaoxapentadecane	0.39	0.61	5.11	2.8303	2	1
n-nonane	2,5,8,11,14-pentaoxapentadecane	0.31	0.69	5.67	3.0384	2	1
n-nonane	2,5,8,11,14-pentaoxapentadecane	0.21	0.79	6.36	3.3024	2	1
n-nonane	2,5,8,11,14-pentaoxapentadecane	0.1	0.9	7.08	3.597	2	2
n-nonane	2,5,8,11,14-pentaoxapentadecane	0.05	0.95	7.42	3.7414	2	2
n-nonane	2,5,8,11,14-pentaoxapentadecane	0	1	7.79	3.8979	2	2
ccl4	methanol	0	1	32.5	39.6874	3	4
ccl4	methanol	0.01	0.99	31.57	37.1264	3	4
ccl4	methanol	0.03	0.97	30.56	34.6614	3	3
ccl4	methanol	0.06	0.94	28.46	29.92	3	3
ccl4	methanol	0.08	0.92	27	27.0505	3	3
ccl4	methanol	0.11	0.89	25.46	23.7545	3	3
ccl4	methanol	0.15	0.85	23.22	19.9217	3	3
ccl4	methanol	0.24	0.76	18.77	13.8304	3	3
ccl4	methanol	0.36	0.64	14.29	8.5995	3	2
ccl4	methanol	0.5	0.5	9.22	5.0239	2	2
ccl4	methanol	0.59	0.41	6.95	3.7611	2	2
chbr3	hexane	0	1	1.887	2	1	1
chbr3	hexane	0.1	0.9	2.014	2.0151	1	1
chbr3	hexane	0.2	0.8	2.213	2.0586	1	1
chbr3	hexane	0.3	0.7	2.289	2.1316	1	1
chbr3	hexane	0.4	0.6	2.504	2.2363	1	1
chbr3	hexane	0.5	0.5	2.707	2.3763	1	1
chbr3	hexane	0.6	0.4	2.957	2.5449	1	1
chbr3	hexane	0.7	0.3	3.197	2.7558	1	1
chbr3	hexane	0.8	0.2	3.518	2.9903	2	1
chbr3	hexane	0.9	0.1	3.873	3.2801	2	1
chbr3	hexane	1	0	4.353	3.5994	2	2
chbr3	n-heptane	0	1	1.903	2.0078	1	1
chbr3	n-heptane	0.11	0.89	2.052	2.0403	1	1
chbr3	n-heptane	0.21	0.79	2.185	2.0931	1	1
chbr3	n-heptane	0.3	0.7	2.309	2.1651	1	1
chbr3	n-heptane	0.4	0.6	2.482	2.2621	1	1
chbr3	n-heptane	0.5	0.5	2.677	2.3925	1	1
chbr3	n-heptane	0.6	0.4	2.933	2.5614	1	1
chbr3	n-heptane	0.7	0.3	3.162	2.7541	1	1
chbr3	n-heptane	0.8	0.2	3.471	2.9871	1	1
chbr3	n-heptane	0.9	0.1	3.868	3.2723	2	1
chbr3	n-heptane	1	0	4.353	3.5994	2	2
chbr3	octane	0	1	1.93	2	1	1
chbr3	octane	0.1	0.9	2.073	2.0118	1	1
chbr3	octane	0.21	0.79	2.142	2.0488	1	1
chbr3	octane	0.3	0.7	2.254	2.1069	1	1
chbr3	octane	0.45	0.55	2.536	2.2535	1	1
chbr3	octane	0.5	0.5	2.64	2.3222	1	1
chbr3	octane	0.6	0.4	2.87	2.4783	1	1
chbr3	octane	0.7	0.3	3.086	2.6836	1	1
chbr3	octane	0.8	0.2	3.464	2.9323	1	1
chbr3	octane	0.9	0.1	3.842	3.2372	2	1
chbr3	octane	1	0	4.353	3.5994	2	2
chbr3	2,2,4-trimethylpentane	0	1	1.928	2.0112	1	1
chbr3	2,2,4-trimethylpentane	0.11	0.89	2.074	2.0425	1	1
chbr3	2,2,4-trimethylpentane	0.2	0.8	2.121	2.092	1	1
chbr3	2,2,4-trimethylpentane	0.3	0.7	2.333	2.1637	1	1
chbr3	2,2,4-trimethylpentane	0.4	0.6	2.435	2.264	1	1
chbr3	2,2,4-trimethylpentane	0.5	0.5	2.664	2.3914	1	1
chbr3	2,2,4-trimethylpentane	0.6	0.4	2.814	2.5516	1	1
chbr3	2,2,4-trimethylpentane	0.7	0.3	3.146	2.7416	1	1
chbr3	2,2,4-trimethylpentane	0.8	0.2	3.765	2.9871	2	1
chbr3	2,2,4-trimethylpentane	0.9	0.1	3.826	3.2559	2	1
chbr3	2,2,4-trimethylpentane	1	0	4.353	3.5994	2	2
chbr3	n-nonane	0	1	1.951	2.0062	1	1
chbr3	n-nonane	0.1	0.9	2.047	2.0296	1	1
chbr3	n-nonane	0.2	0.8	2.164	2.0703	1	1
chbr3	n-nonane	0.31	0.69	2.252	2.1431	1	1
chbr3	n-nonane	0.4	0.6	2.394	2.2284	1	1
chbr3	n-nonane	0.51	0.49	2.566	2.3568	1	1
chbr3	n-nonane	0.6	0.4	2.776	2.5071	1	1
chbr3	n-nonane	0.7	0.3	3.014	2.6903	1	1
chbr3	n-nonane	0.8	0.2	3.386	2.9392	1	1
chbr3	n-nonane	0.9	0.1	3.787	3.24	2	1
chbr3	n-nonane	1	0	4.353	3.5994	2	2
chbr3	tetralin	0	1	2.853	2.8032	1	1
chbr3	tetralin	0.1	0.9	2.927	2.8584	1	1
chbr3	tetralin	0.2	0.8	3.103	2.9173	1	1
chbr3	tetralin	0.3	0.7	3.224	2.9779	1	1
chbr3	tetralin	0.4	0.6	3.338	3.049	1	1
chbr3	tetralin	0.49	0.51	3.441	3.1184	1	1
chbr3	tetralin	0.6	0.4	3.627	3.1999	2	1
chbr3	tetralin	0.69	0.31	3.735	3.2846	2	1
chbr3	tetralin	0.8	0.2	3.882	3.3793	2	1
chbr3	tetralin	0.9	0.1	4.134	3.4823	2	1
chbr3	tetralin	1	0	4.353	3.5994	2	2
chbr3	n-decane	0	1	2	2	1	1
chbr3	n-decane	0.11	0.89	2.088	2.011	1	1
chbr3	n-decane	0.2	0.8	2.297	2.0369	1	1
chbr3	n-decane	0.3	0.7	2.279	2.0872	1	1
chbr3	n-decane	0.4	0.6	2.427	2.1695	1	1
chbr3	n-decane	0.5	0.5	2.607	2.2785	1	1
chbr3	n-decane	0.6	0.4	2.785	2.4255	1	1
chbr3	n-decane	0.7	0.3	3.015	2.6124	1	1
chbr3	n-decane	0.8	0.2	3.385	2.8725	1	1
chbr3	n-decane	0.9	0.1	3.821	3.1822	2	1
chbr3	n-decane	1	0	4.353	3.5994	2	2
chbr3	dodecane	0	1	2.021	2	1	1
chbr3	dodecane	0.1	0.9	2.07	2.0091	1	1
chbr3	dodecane	0.2	0.8	2.156	2.036	1	1
chbr3	dodecane	0.3	0.7	2.239	2.0825	1	1
chbr3	dodecane	0.41	0.59	2.383	2.1554	1	1
chbr3	dodecane	0.49	0.51	2.507	2.2398	1	1
chbr3	dodecane	0.61	0.39	2.66	2.3992	1	1
chbr3	dodecane	0.69	0.31	2.901	2.5619	1	1
chbr3	dodecane	0.8	0.2	3.201	2.8369	1	1
chbr3	dodecane	0.9	0.1	3.671	3.1471	2	1
chbr3	dodecane	1	0	4.353	3.5994	2	2
chbr3	tetradecane	0	1	2.037	2.0001	1	1
chbr3	tetradecane	0.11	0.89	2.103	2.0093	1	1
chbr3	tetradecane	0.21	0.79	2.199	2.034	1	1
chbr3	tetradecane	0.3	0.7	2.289	2.074	1	1
chbr3	tetradecane	0.41	0.59	2.357	2.1421	1	1
chbr3	tetradecane	0.5	0.5	2.5	2.2277	1	1
chbr3	tetradecane	0.61	0.39	2.664	2.3705	1	1
chbr3	tetradecane	0.71	0.29	2.87	2.5515	1	1
chbr3	tetradecane	0.81	0.19	3.221	2.8029	1	1
chbr3	tetradecane	0.9	0.1	3.62	3.1232	2	1
chbr3	tetradecane	1	0	4.353	3.5994	2	2
chbr3	n-hexadecane	0	1	2.09	2	1	1
chbr3	n-hexadecane	0.11	0.89	2.149	2.0076	1	1
chbr3	n-hexadecane	0.21	0.79	2.224	2.0285	1	1
chbr3	n-hexadecane	0.3	0.7	2.291	2.0637	1	1
chbr3	n-hexadecane	0.4	0.6	2.358	2.1195	1	1
chbr3	n-hexadecane	0.49	0.51	2.471	2.2004	1	1
chbr3	n-hexadecane	0.6	0.4	2.649	2.3255	1	1
chbr3	n-hexadecane	0.7	0.3	2.831	2.4905	1	1
chbr3	n-hexadecane	0.8	0.2	3.156	2.7395	1	1
chbr3	n-hexadecane	0.9	0.1	3.607	3.0741	2	1
chbr3	n-hexadecane	1	0	4.353	3.5994	2	2
formamide	dimethylformamide	0	1	37.7	37.7835	4	4
formamide	dimethylformamide	0.05	0.95	38.38	40.0042	4	4
formamide	dimethylformamide	0.1	0.9	39.74	42.3329	4	4
formamide	dimethylformamide	0.15	0.85	41.2	44.8215	4	4
formamide	dimethylformamide	0.2	0.8	42.77	47.3803	4	4
formamide	dimethylformamide	0.25	0.75	44.41	50.138	4	4
formamide	dimethylformamide	0.3	0.7	46.09	53.0467	4	4
formamide	dimethylformamide	0.4	0.6	49.58	59.3165	4	4
formamide	dimethylformamide	0.5	0.5	53.27	66.165	4	4
formamide	dimethylformamide	0.6	0.4	57.21	73.5376	4	4
formamide	dimethylformamide	0.7	0.3	63.65	81.3576	4	4
formamide	dimethylformamide	0.8	0.2	74.02	89.5985	4	4
formamide	dimethylformamide	0.9	0.1	89.58	97.9627	4	4
formamide	dimethylformamide	1	0	109.7	106.392	4	4
formamide	propanol	0	1	20.13	23.3178	3	3
formamide	propanol	0.17	0.83	36.75	38.0702	4	4
formamide	propanol	0.32	0.68	52.85	49.7543	4	4
formamide	propanol	0.45	0.55	68.58	59.3489	4	4
formamide	propanol	0.5	0.5	76.91	63.6379	4	4
formamide	propanol	0.56	0.44	84.52	67.6768	4	4
formamide	propanol	0.61	0.39	91.11	71.5102	4	4
formamide	propanol	0.65	0.35	96.78	75.1738	4	4
formamide	propanol	0.74	0.26	106.42	82.1053	4	4
formamide	propanol	0.81	0.19	111.45	88.6357	4	4
formamide	propanol	0.88	0.12	111.23	94.8423	4	4
formamide	propanol	0.94	0.06	110.61	100.784	4	4
formamide	propanol	1	0	109.7	106.491	4	4
formamide	propyleneglycol	0	1	31.36	20.0304	3	3
formamide	propyleneglycol	0.04	0.96	33.85	22.011	3	3
formamide	propyleneglycol	0.09	0.91	37.01	25.1177	4	3
formamide	propyleneglycol	0.13	0.87	39.41	27.3315	4	3
formamide	propyleneglycol	0.17	0.83	42.26	30.4665	4	3
formamide	propyleneglycol	0.32	0.68	52.07	40.5544	4	4
formamide	propyleneglycol	0.42	0.58	58.65	48.4265	4	4
formamide	propyleneglycol	0.55	0.45	68.57	60.0777	4	4
formamide	propyleneglycol	0.6	0.4	72.26	64.549	4	4
formamide	propyleneglycol	0.65	0.35	76.47	69.3893	4	4
formamide	propyleneglycol	0.73	0.27	83.05	77.1941	4	4
formamide	propyleneglycol	0.81	0.19	89.71	85.075	4	4
formamide	propyleneglycol	0.88	0.12	96.92	92.5758	4	4
formamide	propyleneglycol	0.94	0.06	104.36	99.7897	4	4
formamide	propyleneglycol	1	0	109.7	106.72	4	4
formamide	glycerol	0	1	42.54	38.4446	4	4
formamide	glycerol	0.07	0.93	46.25	42.1456	4	4
formamide	glycerol	0.12	0.88	49.27	45.1513	4	4
formamide	glycerol	0.17	0.83	52.48	48.5116	4	4
formamide	glycerol	0.25	0.75	57.58	53.8414	4	4
formamide	glycerol	0.31	0.69	60.91	57.498	4	4
formamide	glycerol	0.36	0.64	64.22	61.2949	4	4
formamide	glycerol	0.44	0.56	69.41	67.0056	4	4
formamide	glycerol	0.49	0.51	72.37	70.7692	4	4
formamide	glycerol	0.51	0.49	73.36	72.0442	4	4
formamide	glycerol	0.56	0.43	76.41	76.0302	4	4
formamide	glycerol	0.59	0.41	78.06	78.1871	4	4
formamide	glycerol	0.65	0.35	80.67	81.9102	4	4
formamide	glycerol	0.7	0.3	84.81	85.9719	4	4
formamide	glycerol	0.75	0.25	89.32	89.4389	4	4
formamide	glycerol	0.81	0.19	95.04	93.7711	4	4
formamide	glycerol	0.88	0.12	100.54	98.5587	4	4
formamide	glycerol	0.94	0.06	104.88	102.885	4	4
formamide	glycerol	1	0	109.7	106.807	4	4
formamide	chlorobenzene	1	0	108.18	106.712	4	4
formamide	chlorobenzene	0.78	0.22	89.65	54.6423	4	4
formamide	chlorobenzene	0.61	0.39	76.57	33.8007	4	3
formamide	chlorobenzene	0.48	0.52	65.11	23.4816	4	3
formamide	chlorobenzene	0.37	0.63	53.97	17.6416	4	3
formamide	chlorobenzene	0.28	0.72	43.22	14.0111	4	3
formamide	chlorobenzene	0.21	0.79	33.73	11.6008	3	3
formamide	chlorobenzene	0.14	0.86	24.92	9.773	3	2
formamide	chlorobenzene	0.09	0.91	18.7	8.681	3	2
formamide	chlorobenzene	0.04	0.96	12.05	7.7508	3	2
formamide	chlorobenzene	0	1	5.54	7.0406	2	2
methanol	acetonitrile	0	1	35.96	46.7373	4	4
methanol	acetonitrile	0.02	0.98	36.15	47.1321	4	4
methanol	acetonitrile	0.05	0.95	36.42	47.5311	4	4
methanol	acetonitrile	0.08	0.92	36.54	47.8404	4	4
methanol	acetonitrile	0.1	0.9	36.57	48.0144	4	4
methanol	acetonitrile	0.12	0.88	36.57	48.1693	4	4
methanol	acetonitrile	0.15	0.85	36.51	48.3721	4	4
methanol	acetonitrile	0.2	0.8	36.34	48.4995	4	4
methanol	acetonitrile	0.25	0.75	36.09	48.6501	4	4
methanol	acetonitrile	0.3	0.7	35.82	48.7349	4	4
methanol	acetonitrile	0.35	0.65	35.54	48.7552	4	4
methanol	acetonitrile	0.4	0.6	35.28	48.7089	4	4
methanol	acetonitrile	0.45	0.55	35.05	48.5922	4	4
methanol	acetonitrile	0.5	0.5	34.84	48.3992	3	4
methanol	acetonitrile	0.55	0.45	34.64	47.7676	3	4
methanol	acetonitrile	0.6	0.4	34.44	47.3777	3	4
methanol	acetonitrile	0.65	0.35	34.24	46.8916	3	4
methanol	acetonitrile	0.7	0.3	34.02	46.2982	3	4
methanol	acetonitrile	0.75	0.25	33.79	45.5847	3	4
methanol	acetonitrile	0.8	0.2	33.53	44.7367	3	4
methanol	acetonitrile	0.85	0.15	33.27	43.7377	3	4
methanol	acetonitrile	0.9	0.1	33.01	42.5694	3	4
methanol	acetonitrile	0.95	0.05	32.75	41.2117	3	4
methanol	acetonitrile	1	0	32.66	39.6427	3	4
methanol	1,2-dichloroethane	0	1	10.43	5.7011	3	2
methanol	1,2-dichloroethane	0.18	0.82	14.8	7.5649	3	2
methanol	1,2-dichloroethane	0.33	0.67	18.3	9.868	3	2
methanol	1,2-dichloroethane	0.46	0.54	21.6	12.5502	3	3
methanol	1,2-dichloroethane	0.57	0.43	24.1	15.5985	3	3
methanol	1,2-dichloroethane	0.66	0.34	26.4	18.9724	3	3
methanol	1,2-dichloroethane	0.75	0.25	28.2	22.6635	3	3
methanol	1,2-dichloroethane	0.82	0.18	29.8	26.6392	3	3
methanol	1,2-dichloroethane	0.89	0.11	31.1	30.8671	3	3
methanol	1,2-dichloroethane	0.95	0.05	32.3	35.1509	3	4
methanol	1,2-dichloroethane	1	0	32.57	39.6842	3	4
methanol	dimethylsulfoxide	0	1	45.91	41.019	4	4
methanol	dimethylsulfoxide	0.05	0.95	46.14	40.7798	4	4
methanol	dimethylsulfoxide	0.1	0.9	46.31	40.6899	4	4
methanol	dimethylsulfoxide	0.16	0.84	46.37	40.7727	4	4
methanol	dimethylsulfoxide	0.19	0.81	46.4	40.9055	4	4
methanol	dimethylsulfoxide	0.25	0.75	46.38	41.2975	4	4
methanol	dimethylsulfoxide	0.3	0.7	46.3	41.8126	4	4
methanol	dimethylsulfoxide	0.33	0.67	46.24	42.2313	4	4
methanol	dimethylsulfoxide	0.35	0.65	46.15	42.4591	4	4
methanol	dimethylsulfoxide	0.41	0.59	45.89	43.359	4	4
methanol	dimethylsulfoxide	0.45	0.55	45.6	44.0235	4	4
methanol	dimethylsulfoxide	0.49	0.51	45.18	44.8734	4	4
methanol	dimethylsulfoxide	0.52	0.48	44.8	45.5377	4	4
methanol	dimethylsulfoxide	0.57	0.43	44.12	46.3352	4	4
methanol	dimethylsulfoxide	0.61	0.39	43.3	47.299	4	4
methanol	dimethylsulfoxide	0.65	0.35	42.56	47.986	4	4
methanol	dimethylsulfoxide	0.67	0.33	42.13	48.3076	4	4
methanol	dimethylsulfoxide	0.7	0.3	41.47	48.7195	4	4
methanol	dimethylsulfoxide	0.72	0.28	40.95	49.1376	4	4
methanol	dimethylsulfoxide	0.76	0.24	40.01	49.3563	4	4
methanol	dimethylsulfoxide	0.8	0.2	38.77	49.2319	4	4
methanol	dimethylsulfoxide	0.85	0.15	36.76	48.4998	4	4
methanol	dimethylsulfoxide	0.9	0.1	35.11	46.7896	4	4
methanol	dimethylsulfoxide	0.95	0.05	33.49	43.7901	3	4
methanol	dimethylsulfoxide	1	0	31.93	38.995	3	4
methanol	methylacetate	0	1	6.74	8.8658	2	2
methanol	methylacetate	0.18	0.82	10.66	10.1427	3	3
methanol	methylacetate	0.33	0.67	15.01	11.6884	3	3
methanol	methylacetate	0.46	0.54	17.5	13.5756	3	3
methanol	methylacetate	0.57	0.43	20.12	15.8375	3	3
methanol	methylacetate	0.66	0.34	23.02	18.5194	3	3
methanol	methylacetate	0.75	0.25	25.64	21.6622	3	3
methanol	methylacetate	0.82	0.18	29.17	25.3134	3	3
methanol	methylacetate	0.89	0.11	30.24	29.5075	3	3
methanol	methylacetate	0.95	0.05	31.98	34.3045	3	3
methanol	methylacetate	1	0	33.1	39.733	3	4
methanol	dimethylformamide	0	1	37.7	37.7835	4	4
methanol	dimethylformamide	0.05	0.95	37.86	38.0643	4	4
methanol	dimethylformamide	0.1	0.9	37.98	38.389	4	4
methanol	dimethylformamide	0.2	0.8	38.19	39.1481	4	4
methanol	dimethylformamide	0.3	0.7	38.33	40.1565	4	4
methanol	dimethylformamide	0.04	0.96	38.36	37.9759	4	4
methanol	dimethylformamide	0.4	0.6	38.32	41.2868	4	4
methanol	dimethylformamide	0.04	0.95	38.26	38.0344	4	4
methanol	dimethylformamide	0.5	0.5	38.14	42.7216	4	4
methanol	dimethylformamide	0.55	0.45	37.96	43.495	4	4
methanol	dimethylformamide	0.6	0.4	37.77	44.2708	4	4
methanol	dimethylformamide	0.7	0.3	37.27	45.6276	4	4
methanol	dimethylformamide	0.8	0.2	36.54	46.1439	4	4
methanol	dimethylformamide	0.9	0.1	35.23	44.6477	4	4
methanol	dimethylformamide	1	0	32.53	39.3609	3	4
methanol	thf	0	1	7.62	9.3896	2	2
methanol	thf	0.08	0.92	8.24	10.2385	2	3
methanol	thf	0.21	0.79	9.22	12.1032	2	3
methanol	thf	0.44	0.56	12.21	16.3088	3	3
methanol	thf	0.57	0.43	14.52	19.8225	3	3
methanol	thf	0.68	0.32	18.43	23.5221	3	3
methanol	thf	0.81	0.19	22.42	28.6629	3	3
methanol	thf	0.89	0.11	26.1	32.6293	3	3
methanol	thf	0.96	0.04	30.42	36.6704	3	4
methanol	thf	1	0	32.63	39.3997	3	4
methanol	dioxane	0	1	2.31	2	1	1
methanol	dioxane	0.08	0.92	2.75	2.0354	1	1
methanol	dioxane	0.19	0.81	3.49	2.2281	1	1
methanol	dioxane	0.26	0.74	4.01	2.4494	2	1
methanol	dioxane	0.33	0.67	4.92	2.803	2	1
methanol	dioxane	0.41	0.59	6.24	3.4546	2	1
methanol	dioxane	0.45	0.55	7.03	3.8966	2	2
methanol	dioxane	0.5	0.5	8.16	4.5376	2	2
methanol	dioxane	0.55	0.45	9.52	5.3615	2	2
methanol	dioxane	0.6	0.4	11.08	6.3496	3	2
methanol	dioxane	0.63	0.37	12.33	7.2711	3	2
methanol	dioxane	0.65	0.35	13.04	7.7949	3	2
[truncated: 1,793 more rows]

## Sheet: aqueousMixtures
non aqueous compound	mole fraction of water	mole fraction of non aqueous compound	εr,exp	εr,calc	Griffith's class (exp)	Griffith's class (calc)
formamide	1	0	79.5	89.0833	4	4
formamide	0.95	0.05	79.92	93.3125	4	4
formamide	0.9	0.1	84.78	96.8602	4	4
formamide	0.8	0.2	87.14	102.203	4	4
formamide	0.7	0.3	91.81	105.616	4	4
formamide	0.6	0.4	99.83	107.609	4	4
formamide	0.5	0.5	100.83	108.566	4	4
formamide	0.4	0.6	107.1	108.793	4	4
formamide	0.3	0.7	107.17	108.533	4	4
formamide	0.2	0.8	110.28	107.973	4	4
formamide	0.1	0.9	110.97	107.26	4	4
formamide	0.05	0.95	110.49	106.883	4	4
formamide	0	1	109.08	106.508	4	4
2,2,2-trifluoroethanol	1	0	78.54	87.8094	4	4
2,2,2-trifluoroethanol	0.98	0.02	76.54	83.1551	4	4
2,2,2-trifluoroethanol	0.96	0.04	72.19	78.1625	4	4
2,2,2-trifluoroethanol	0.93	0.07	68.27	72.8135	4	4
2,2,2-trifluoroethanol	0.89	0.11	63.09	67.0818	4	4
2,2,2-trifluoroethanol	0.85	0.15	57.87	60.9735	4	4
2,2,2-trifluoroethanol	0.79	0.21	52.21	54.4589	4	4
2,2,2-trifluoroethanol	0.7	0.3	45.96	47.4745	4	4
2,2,2-trifluoroethanol	0.58	0.42	39.98	39.9553	4	4
2,2,2-trifluoroethanol	0.38	0.62	33.56	31.5729	3	3
2,2,2-trifluoroethanol	0	1	26.69	20.867	3	3
acetonitrile	1	0	78.3	89.237	4	4
acetonitrile	0.96	0.04	76.8	91.9242	4	4
acetonitrile	0.92	0.08	74.9	94.0936	4	4
acetonitrile	0.87	0.13	69.7	95.5543	4	4
acetonitrile	0.81	0.19	66.8	95.9328	4	4
acetonitrile	0.74	0.26	54.5	94.8881	4	4
acetonitrile	0.66	0.34	52.3	91.9135	4	4
acetonitrile	0.56	0.44	52	86.8059	4	4
acetonitrile	0.42	0.58	47.3	77.7937	4	4
acetonitrile	0.24	0.76	41.4	64.7941	4	4
acetonitrile	0	1	37	46.7373	4	4
aceticacid	0.98	0.02	76	84.0253	4	4
aceticacid	0.95	0.04	73.2	80.2641	4	4
aceticacid	0.92	0.08	69.3	74.8434	4	4
aceticacid	0.86	0.14	63.7	67.1657	4	4
aceticacid	0.82	0.18	57.9	61.3542	4	4
aceticacid	0.72	0.28	50.7	48.5519	4	4
aceticacid	0.55	0.45	37	29.1257	4	3
aceticacid	0.39	0.61	26.5	16.968	3	3
aceticacid	0.21	0.79	16.5	9.3971	3	2
aceticacid	0.1	0.9	11.2	6.9258	3	2
aceticacid	0	1	6.6	5.4576	2	2
methylformamide	1	0	79.5	89.2806	4	4
methylformamide	0.95	0.05	81.05	92.1918	4	4
methylformamide	0.9	0.1	81.83	95.2718	4	4
methylformamide	0.8	0.2	85.97	102.036	4	4
methylformamide	0.7	0.3	90.98	109.373	4	4
methylformamide	0.6	0.4	95.92	117	4	4
methylformamide	0.5	0.5	106.4	124.339	4	4
methylformamide	0.4	0.6	111.94	131.429	4	4
methylformamide	0.3	0.7	121.54	137.82	4	4
methylformamide	0.2	0.8	133.13	143.14	4	4
methylformamide	0.1	0.9	152.01	145.463	4	4
methylformamide	0.05	0.95	165.43	146.529	4	4
methylformamide	0	1	176.58	147.064	4	4
dimethylsulfoxide	1	0	79.5	89.6289	4	4
dimethylsulfoxide	0.95	0.05	79.2	84.7852	4	4
dimethylsulfoxide	0.9	0.1	79	80.4725	4	4
dimethylsulfoxide	0.8	0.2	78.9	73.0576	4	4
dimethylsulfoxide	0.7	0.3	77.9	66.7151	4	4
dimethylsulfoxide	0.6	0.4	76.4	60.8862	4	4
dimethylsulfoxide	0.5	0.5	76.1	55.5149	4	4
dimethylsulfoxide	0.4	0.6	73.5	51.059	4	4
dimethylsulfoxide	0.3	0.7	70.4	47.4958	4	4
dimethylsulfoxide	0.2	0.8	65.5	44.6792	4	4
dimethylsulfoxide	0.1	0.9	58.8	42.5797	4	4
dimethylsulfoxide	0.05	0.95	53.8	41.7343	4	4
dimethylsulfoxide	0	1	48.4	41.019	4	4
ethanolamine	1	0	78.48	89.8516	4	4
ethanolamine	0.97	0.03	76.51	83.8436	4	4
ethanolamine	0.93	0.07	74.04	77.8055	4	4
ethanolamine	0.89	0.11	70.78	71.7441	4	4
ethanolamine	0.83	0.17	66.87	65.7366	4	4
ethanolamine	0.77	0.23	61.74	59.7181	4	4
ethanolamine	0.69	0.31	56.61	53.6887	4	4
ethanolamine	0.59	0.41	53.43	47.6624	4	4
ethanolamine	0.45	0.55	49.96	41.473	4	4
ethanolamine	0.27	0.73	44.93	34.8992	4	3
ethanolamine	0	1	37.7	27.064	4	3
propanone	1	0	78.4	89.2893	4	4
propanone	0.99	0.01	76.7	87.5098	4	4
propanone	0.97	0.03	73.4	84.0658	4	4
propanone	0.95	0.05	69.9	80.857	4	4
propanone	0.93	0.07	67.3	77.8912	4	4
propanone	0.9	0.1	63.2	73.8408	4	4
propanone	0.85	0.15	57.1	67.9138	4	4
propanone	0.8	0.2	53.56	62.1028	4	4
propanone	0.6	0.4	38.76	46.3504	4	4
propanone	0.4	0.6	30.07	36.0327	3	4
propanone	0.2	0.8	24.63	28.8832	3	3
propanone	0	1	20.74	23.8255	3	3
propionicacid	0.97	0.03	73.2	80.5682	4	4
propionicacid	0.94	0.06	67.7	74.9225	4	4
propionicacid	0.89	0.11	57.8	65.1545	4	4
propionicacid	0.82	0.18	47.3	54.308	4	4
propionicacid	0.74	0.26	36.8	42.8477	4	4
propionicacid	0.57	0.43	24.9	25.8446	3	3
propionicacid	0.4	0.6	15.3	14.5547	3	3
propionicacid	0.26	0.74	9.3	8.9823	2	2
propionicacid	0.1	0.9	5	5.7295	2	2
2-methoxyethanol	1	0	78.24	89.0036	4	4
2-methoxyethanol	0.98	0.02	72.62	82.1389	4	4
2-methoxyethanol	0.95	0.05	66.62	75.2281	4	4
2-methoxyethanol	0.91	0.09	61.38	68.4749	4	4
2-methoxyethanol	0.87	0.13	58.28	61.6405	4	4
2-methoxyethanol	0.81	0.19	52.14	54.7153	4	4
2-methoxyethanol	0.74	0.26	46.06	47.7841	4	4
2-methoxyethanol	0.65	0.35	39.2	40.7912	4	4
2-methoxyethanol	0.52	0.48	33.15	33.4997	3	3
2-methoxyethanol	0.32	0.68	24.23	25.6369	3	3
2-methoxyethanol	0	1	16.94	16.2851	3	3
thf	1	0	78.51	89.3681	4	4
thf	0.97	0.03	71.85	80.828	4	4
thf	0.94	0.06	64.49	72.3771	4	4
thf	0.92	0.08	59.98	68.3095	4	4
thf	0.9	0.1	56.01	64.2074	4	4
thf	0.88	0.12	51.94	60.1792	4	4
thf	0.86	0.14	47.5	56.1599	4	4
thf	0.83	0.17	43.02	52.2451	4	4
thf	0.8	0.2	48.54	48.366	4	4
thf	0.77	0.23	34.19	44.504	3	4
thf	0.73	0.27	29.98	40.7188	3	4
thf	0.68	0.32	26.01	36.9359	3	4
thf	0.63	0.37	23.09	33.1934	3	3
thf	0.57	0.43	20.19	29.4076	3	3
thf	0.5	0.5	17.48	25.5691	3	3
thf	0.33	0.67	12.91	18.3959	3	3
thf	0.18	0.82	10.09	13.5515	3	3
thf	0	1	7.42	9.3896	2	2
butyricacid	0.91	0.09	53.9	65.4676	4	4
butyricacid	0.79	0.21	33.9	46.0403	3	4
butyricacid	0.66	0.34	22.6	31.3011	3	3
butyricacid	0.56	0.44	17.3	23.2856	3	3
butyricacid	0.43	0.57	11.9	15.1701	3	3
n,n-dimethylacetamide	1	0	78.56	89.4825	4	4
n,n-dimethylacetamide	0.98	0.02	76.49	85.5127	4	4
n,n-dimethylacetamide	0.94	0.06	73.51	80.2447	4	4
n,n-dimethylacetamide	0.93	0.07	72.42	78.5845	4	4
n,n-dimethylacetamide	0.9	0.1	70.49	75.7425	4	4
n,n-dimethylacetamide	0.89	0.11	68.98	73.6196	4	4
n,n-dimethylacetamide	0.85	0.15	66.35	70.4693	4	4
n,n-dimethylacetamide	0.81	0.19	63.48	66.8429	4	4
n,n-dimethylacetamide	0.78	0.22	61.51	64.3685	4	4
n,n-dimethylacetamide	0.75	0.25	59.83	62.378	4	4
n,n-dimethylacetamide	0.72	0.28	58.19	60.2729	4	4
n,n-dimethylacetamide	0.7	0.3	57.24	58.9903	4	4
n,n-dimethylacetamide	0.67	0.33	55.62	57.0352	4	4
n,n-dimethylacetamide	0.63	0.37	54.16	54.8643	4	4
n,n-dimethylacetamide	0.59	0.41	52.49	52.315	4	4
n,n-dimethylacetamide	0.55	0.45	51.01	50.1154	4	4
n,n-dimethylacetamide	0.5	0.5	49.05	47.481	4	4
n,n-dimethylacetamide	0.44	0.56	47.31	44.5637	4	4
n,n-dimethylacetamide	0.36	0.64	45.49	41.4875	4	4
n,n-dimethylacetamide	0.29	0.71	43.72	38.8243	4	4
n,n-dimethylacetamide	0.2	0.8	41.75	36.0915	4	4
n,n-dimethylacetamide	0.13	0.87	40.03	33.9683	4	3
n,n-dimethylacetamide	0.07	0.93	39.05	32.6374	4	3
n,n-dimethylacetamide	0.01	0.98	37.98	31.2134	4	3
n,n-dimethylacetamide	0	1	37.76	30.878	4	3
n-methylpropanamide	1	0	78.32	89.5939	4	4
n-methylpropanamide	0.98	0.02	78.92	87.1804	4	4
n-methylpropanamide	0.95	0.05	79.61	84.8718	4	4
n-methylpropanamide	0.92	0.08	80.28	82.755	4	4
n-methylpropanamide	0.89	0.11	80.98	80.9427	4	4
n-methylpropanamide	0.84	0.16	81.6	79.5363	4	4
n-methylpropanamide	0.78	0.22	82.59	78.7805	4	4
n-methylpropanamide	0.69	0.31	84.92	78.9783	4	4
n-methylpropanamide	0.66	0.34	85.93	79.2671	4	4
n-methylpropanamide	0.63	0.37	87.28	79.7033	4	4
n-methylpropanamide	0.58	0.42	89.06	80.3126	4	4
n-methylpropanamide	0.55	0.45	90.82	80.9047	4	4
n-methylpropanamide	0.53	0.47	92.06	81.3118	4	4
n-methylpropanamide	0.5	0.5	93.61	81.8248	4	4
n-methylpropanamide	0.38	0.62	103.13	83.583	4	4
n-methylpropanamide	0.33	0.67	111.01	84.2425	4	4
n-methylpropanamide	0.27	0.73	123.24	84.9721	4	4
n-methylpropanamide	0.23	0.77	129.61	85.2328	4	4
n-methylpropanamide	0.17	0.83	141.19	85.378	4	4
n-methylpropanamide	0.11	0.89	151.21	85.0704	4	4
n-methylpropanamide	0.07	0.93	157.91	84.5811	4	4
n-methylpropanamide	0.04	0.96	163.35	84.0155	4	4
n-methylpropanamide	0.02	0.98	169.33	83.2817	4	4
n-methylpropanamide	0	1	177.11	82.6418	4	4
1-butanol	1	0	78.56	89.175	4	4
1-butanol	1	0	77.86	88.3689	4	4
1-butanol	0.99	0.01	77.21	87.5771	4	4
1-butanol	0.99	0.01	76.56	86.7994	4	4
1-butanol	0.99	0.01	75.86	86.0354	4	4
1-butanol	0.4	0.6	19.62	29.5843	3	3
1-butanol	0.35	0.65	18.98	28.0428	3	3
1-butanol	0.3	0.7	18.48	26.5656	3	3
1-butanol	0.25	0.75	18.1	25.2047	3	3
1-butanol	0.2	0.8	17.84	23.8968	3	3
1-butanol	0.15	0.85	17.66	22.6143	3	3
1-butanol	0.1	0.9	17.56	21.3267	3	3
1-butanol	0.05	0.95	17.51	19.9961	3	3
1-butanol	0	1	17.5	18.5689	3	3
2-butanol	1	0	78.53	89.3126	4	4
2-butanol	0.98	0.02	73.11	83.2763	4	4
2-butanol	0.97	0.03	71.57	81.605	4	4
2-butanol	0.97	0.03	70.39	80.3976	4	4
2-butanol	0.96	0.04	67.17	77.3797	4	4
2-butanol	0.95	0.05	66.22	76.5617	4	4
2-butanol	0.69	0.31	27.28	42.6857	3	4
2-butanol	0.68	0.32	26.97	42.3179	3	4
2-butanol	0.59	0.41	22.6	36.9252	3	4
2-butanol	0.58	0.42	22.52	36.8209	3	4
2-butanol	0.51	0.49	20.1	33.4236	3	3
2-butanol	0.51	0.49	20.06	33.3548	3	3
2-butanol	0.44	0.56	18.54	30.8853	3	3
2-butanol	0.4	0.6	17.71	29.2994	3	3
2-butanol	0.36	0.64	17.12	27.9951	3	3
2-butanol	0.35	0.65	17	27.7137	3	3
2-butanol	0.3	0.7	16.42	26.1129	3	3
2-butanol	0.24	0.76	15.99	24.4827	3	3
2-butanol	0.19	0.81	15.77	23.1353	3	3
2-butanol	0.19	0.81	15.76	22.9527	3	3
2-butanol	0.15	0.85	15.7	21.8928	3	3
2-butanol	0.12	0.88	15.72	21.0827	3	3
2-butanol	0.08	0.92	15.84	19.9894	3	3
2-butanol	0.07	0.94	15.93	19.4763	3	3
2-butanol	0.04	0.96	16.14	18.6106	3	3
2-butanol	0	1	16.52	17.401	3	3
tert-butanol	1	0	77.87	89.3043	4	4
tert-butanol	0.95	0.05	75.3	75.3756	4	4
tert-butanol	0.9	0.1	73.8	65.3051	4	4
tert-butanol	0.8	0.2	65.1	51.7191	4	4
tert-butanol	0.7	0.3	55.4	42.98	4	4
tert-butanol	0.6	0.4	55	36.8068	4	4
tert-butanol	0.5	0.5	50.1	32.1183	4	3
tert-butanol	0.4	0.6	34.5	28.3275	3	3
tert-butanol	0.3	0.7	26.5	25.074	3	3
tert-butanol	0.2	0.8	20	22.0356	3	3
tert-butanol	0.1	0.9	15.2	19.1101	3	3
tert-butanol	0.05	0.95	12.93	17.5949	3	3
tert-butanol	0	1	11.5	15.9784	3	3
ethoxyethanol	1	0	78.76	89.1288	4	4
ethoxyethanol	0.97	0.03	72.35	79.983	4	4
ethoxyethanol	0.94	0.06	65.92	70.9825	4	4
ethoxyethanol	0.9	0.1	58.83	61.8498	4	4
ethoxyethanol	0.84	0.16	50.42	52.8176	4	4
ethoxyethanol	0.76	0.24	41.85	43.7229	4	4
ethoxyethanol	0.64	0.36	31.11	34.6408	3	3
ethoxyethanol	0.43	0.56	23.68	25.0611	3	3
ethoxyethanol	0	1	13.94	13.841	3	3
n-methyl-2-pyrrolidinone	0.8	0.2	60.33	64.6784	4	4
n-methyl-2-pyrrolidinone	0.6	0.4	48.84	51.2782	4	4
n-methyl-2-pyrrolidinone	0.4	0.6	41.28	41.51	4	4
n-methyl-2-pyrrolidinone	0.2	0.8	35.94	34.9409	4	3
n-methyl-2-pyrrolidinone	0	1	32.16	30.2554	3	3
1,3-dimethyl-2-imidazolidinone	0.8	0.2	58.9	58.0646	4	4
1,3-dimethyl-2-imidazolidinone	0.6	0.4	48.84	44.7766	4	4
1,3-dimethyl-2-imidazolidinone	0.4	0.6	43.52	36.2711	4	4
1,3-dimethyl-2-imidazolidinone	0.2	0.8	39.92	30.7449	4	3
1,3-dimethyl-2-imidazolidinone	0	1	37.47	27.2774	4	3
2-isopropoxyethanol	0.9	0.1	53.55	61.0239	4	4
2-isopropoxyethanol	0.8	0.2	38.34	47.3464	4	4
2-isopropoxyethanol	0.7	0.3	29.9	39.2331	3	4
2-isopropoxyethanol	0.62	0.38	25.35	34.7139	3	3
2-isopropoxyethanol	0.5	0.5	21.33	29.6267	3	3
2-isopropoxyethanol	0.4	0.6	17.83	26.3647	3	3
2-isopropoxyethanol	0.31	0.69	15.72	23.8847	3	3
2-isopropoxyethanol	0.2	0.8	13.74	20.9682	3	3
2-isopropoxyethanol	0	1	10.75	16.3898	3	3
1,5-pentanediol	0.87	0.13	54.2	55.409	4	4
1,5-pentanediol	0.75	0.25	44	42.1445	4	4
1,5-pentanediol	0.67	0.33	39.7	36.7724	4	4
1,5-pentanediol	0.5	0.5	34.3	29.5606	3	3
1,5-pentanediol	0.37	0.63	31.9	26.0616	3	3
1,5-pentanediol	0.24	0.76	29.8	23.4635	3	3
1,5-pentanediol	0.12	0.88	28.3	21.5231	3	3
1,5-pentanediol	0	1	26.9	19.8036	3	3
2-butoxyethanol	1	0	78.36	89.547	4	4
2-butoxyethanol	0.98	0.02	71.7	81.3314	4	4
2-butoxyethanol	0.95	0.05	56.9	68.2422	4	4
2-butoxyethanol	0.9	0.1	44.7	56.8904	4	4
2-butoxyethanol	0.83	0.17	33.6	45.708	3	4
2-butoxyethanol	0.7	0.3	23.5	34.0817	3	3
2-butoxyethanol	0.5	0.5	16.7	25.2268	3	3
2-butoxyethanol	0.3	0.7	12.9	19.7902	3	3
2-butoxyethanol	0.1	0.9	10.4	15.798	3	3
2-butoxyethanol	0	1	9.3	13.8167	2	3
diethyleneglycolmonoethylether	1	0	78.4	89.8736	4	4
diethyleneglycolmonoethylether	0.88	0.12	51.2	51.4159	4	4
diethyleneglycolmonoethylether	0.75	0.25	35	35.9934	3	4
diethyleneglycolmonoethylether	0.5	0.5	22.8	23.3627	3	3
diethyleneglycolmonoethylether	0.37	0.63	19.3	19.7893	3	3
diethyleneglycolmonoethylether	0.25	0.75	16.9	17.2903	3	3
diethyleneglycolmonoethylether	0.12	0.88	14.9	15.1266	3	3
diethyleneglycolmonoethylether	0	1	13.4	13.2844	3	3
1,7-heptanediol	0.55	0.45	27.1	25.8503	3	3
1,7-heptanediol	0.46	0.54	25.9	23.418	3	3
1,7-heptanediol	0.37	0.63	24.6	21.5631	3	3
1,7-heptanediol	0.28	0.72	23.8	20.0836	3	3
1,7-heptanediol	0.14	0.86	23	18.2229	3	3
1,7-heptanediol	0	1	22.4	16.5582	3	3
dipropyleneglycolmonomethylether	1	0	78.48	89.9126	4	4
dipropyleneglycolmonomethylether	0.97	0.03	69.44	72.2893	4	4
dipropyleneglycolmonomethylether	0.95	0.05	61.48	59.7687	4	4
dipropyleneglycolmonomethylether	0.93	0.07	54.86	50.8684	4	4
dipropyleneglycolmonomethylether	0.9	0.1	48.95	43.7972	4	4
dipropyleneglycolmonomethylether	0.88	0.12	44.22	38.6198	4	4
dipropyleneglycolmonomethylether	0.85	0.15	40.07	34.3284	4	3
dipropyleneglycolmonomethylether	0.82	0.17	36.54	30.8318	4	3
dipropyleneglycolmonomethylether	0.8	0.2	33.61	27.9886	3	3
dipropyleneglycolmonomethylether	0.7	0.3	25.5	20.1215	3	3
dipropyleneglycolmonomethylether	0.65	0.35	22.98	17.5929	3	3
dipropyleneglycolmonomethylether	0.6	0.4	21.05	15.5885	3	3
dipropyleneglycolmonomethylether	0.5	0.5	18.07	12.6853	3	3
dipropyleneglycolmonomethylether	0.4	0.6	15.69	10.6915	3	3
dipropyleneglycolmonomethylether	0.3	0.7	13.72	9.2445	3	2
dipropyleneglycolmonomethylether	0.25	0.75	12.91	8.6628	3	2
dipropyleneglycolmonomethylether	0.2	0.8	12.24	8.1465	3	2
dipropyleneglycolmonomethylether	0.15	0.85	11.71	7.7029	3	2
dipropyleneglycolmonomethylether	0.1	0.9	11.26	7.3056	3	2
dipropyleneglycolmonomethylether	0.05	0.95	10.81	6.9286	3	2
dipropyleneglycolmonomethylether	0	1	10.4	6.605	3	2
diethyleneglycolmonobutylether	1	0	78.4	89.7587	4	4
diethyleneglycolmonobutylether	0.99	0.01	73.3	81.3596	4	4
diethyleneglycolmonobutylether	0.95	0.05	55.7	58.3358	4	4
diethyleneglycolmonobutylether	0.84	0.16	33.4	31.855	3	3
diethyleneglycolmonobutylether	0.75	0.25	25.8	23.0596	3	3
diethyleneglycolmonobutylether	0.5	0.5	16.6	13.1207	3	3
diethyleneglycolmonobutylether	0.42	0.58	15.1	11.5582	3	3
diethyleneglycolmonobutylether	0.25	0.75	12.6	9.186	3	2
diethyleneglycolmonobutylether	0.1	0.9	11.1	7.8049	3	2
diethyleneglycolmonobutylether	0	1	10.2	7.0419	3	2
2-2-(hexyloxy)ethoxyethanol	1	0	78.4	89.6911	4	4
2-2-(hexyloxy)ethoxyethanol	0.91	0.09	35.6	40.5596	4	4
2-2-(hexyloxy)ethoxyethanol	0.88	0.12	30.1	33.9734	3	3
2-2-(hexyloxy)ethoxyethanol	0.75	0.25	19.5	19.7437	3	3
2-2-(hexyloxy)ethoxyethanol	0.5	0.5	13	10.9664	3	3
2-2-(hexyloxy)ethoxyethanol	0.37	0.63	11.2	8.9127	3	2
2-2-(hexyloxy)ethoxyethanol	0.25	0.75	10.1	7.6002	3	2
2-2-(hexyloxy)ethoxyethanol	0.12	0.88	9.1	6.5333	2	2
2-2-(hexyloxy)ethoxyethanol	0	1	8.3	5.7599	2	2
2-2-(2-butoxyethoxy)ethoxyethanol	1	0	78.4	89.754	4	4
2-2-(2-butoxyethoxy)ethoxyethanol	0.97	0.03	62.5	65.4498	4	4
2-2-(2-butoxyethoxy)ethoxyethanol	0.88	0.12	36.8	35.3112	4	4
2-2-(2-butoxyethoxy)ethoxyethanol	0.75	0.25	24.1	20.9162	3	3
2-2-(2-butoxyethoxy)ethoxyethanol	0.5	0.5	15.5	11.4762	3	3
2-2-(2-butoxyethoxy)ethoxyethanol	0.25	0.75	11.9	7.7617	3	2
2-2-(2-butoxyethoxy)ethoxyethanol	0.12	0.88	10.7	6.6034	3	2
2-2-(2-butoxyethoxy)ethoxyethanol	0	1	9.8	5.7295	2	2
methanol	0	1	33.77	39.3531	3	4
methanol	0.05	0.95	37.96	41.228	4	4
methanol	0.1	0.9	40.37	43.092	4	4
methanol	0.2	0.8	45.94	46.9334	4	4
methanol	0.3	0.7	51.27	50.7632	4	4
methanol	0.4	0.6	56.16	54.6546	4	4
methanol	0.5	0.5	60.84	58.8232	4	4
methanol	0.6	0.4	65.6	63.389	4	4
methanol	0.7	0.3	65.6	68.4991	4	4
methanol	0.8	0.2	72.13	74.3391	4	4
methanol	0.9	0.1	76.41	81.1158	4	4
methanol	0.95	0.05	76.19	84.9488	4	4
methanol	1	0	79.5	89.1229	4	4
ethanol	0	1	24.95	30.566	3	3
ethanol	0.05	0.95	27.27	32.3901	3	3
ethanol	0.1	0.9	29.27	34.1465	3	3
ethanol	0.2	0.8	35.42	37.6739	4	4
ethanol	0.3	0.7	41.15	41.1026	4	4
ethanol	0.4	0.6	47.56	44.7632	4	4
ethanol	0.5	0.5	55.07	48.8514	4	4
ethanol	0.6	0.4	59.67	53.6084	4	4
ethanol	0.7	0.3	66.08	59.3657	4	4
ethanol	0.8	0.2	70.23	66.6176	4	4
ethanol	0.9	0.1	73.73	76.1508	4	4
ethanol	0.95	0.05	75.97	82.1058	4	4
ethanol	1	0	79.5	89.1821	4	4
glycol2	0	1	41.12	35.0375	4	4
glycol2	1	0	78.76	88.6486	4	4
glycol2	0.04	0.96	41.483	35.826	4	4
glycol2	0.1	0.9	42.654	37.1052	4	4
glycol2	0.15	0.85	43.672	38.4147	4	4
glycol2	0.25	0.75	46.012	40.6984	4	4
glycol2	0.4	0.6	49.963	44.6264	4	4
glycol2	0.45	0.55	51.593	46.3506	4	4
glycol2	0.5	0.5	53.087	48.0089	4	4
glycol2	0.55	0.45	54.839	50.0595	4	4
glycol2	0.6	0.4	56.665	52.3929	4	4
glycol2	0.65	0.35	58.461	54.7558	4	4
glycol2	0.75	0.25	62.616	60.775	4	4
glycol2	0.85	0.15	67.605	68.9436	4	4
glycol2	0.9	0.1	70.542	74.115	4	4
glycol2	0.91	0.09	71.227	75.3562	4	4
glycol2	0.91	0.09	71.584	76.0025	4	4
glycol2	0.93	0.07	72.322	77.3496	4	4
glycol2	0.94	0.06	73.084	78.7564	4	4
glycol2	0.95	0.05	74.054	80.5512	4	4
glycol2	0.95	0.05	74.495	81.3696	4	4
glycol2	0.96	0.04	74.854	82.0447	4	4
glycol2	0.97	0.03	75.703	83.6366	4	4
glycol2	0.98	0.02	76.543	85.2219	4	4
glycol2	0.99	0.01	77.419	86.8792	4	4
glycol2	0.99	0.01	77.677	87.374	4	4
glycol2	0.99	0.01	77.888	87.771	4	4
dimethylformamide	0	1	39.88	37.7835	4	4
dimethylformamide	0.05	0.95	41.94	39.0755	4	4
dimethylformamide	0.1	0.9	46.21	40.476	4	4
dimethylformamide	0.2	0.8	51.87	43.4166	4	4
dimethylformamide	0.3	0.7	57	46.7951	4	4
dimethylformamide	0.4	0.6	63.09	50.8139	4	4
dimethylformamide	0.5	0.5	67.9	55.4653	4	4
dimethylformamide	0.6	0.4	72.12	60.7322	4	4
dimethylformamide	0.7	0.3	74.97	66.6726	4	4
dimethylformamide	0.8	0.2	75.75	72.9562	4	4
dimethylformamide	0.9	0.1	76.79	80.1751	4	4
dimethylformamide	0.95	0.05	77.89	84.455	4	4
dimethylformamide	1	0	79.5	89.4002	4	4
propanol	0	1	20.68	23.1035	3	3
propanol	0.05	0.95	21.97	24.9136	3	3
propanol	0.1	0.9	24.3	26.483	3	3
propanol	0.2	0.8	28.71	29.5122	3	3
propanol	0.3	0.7	34.33	32.6021	3	3
propanol	0.4	0.6	41.02	35.9731	4	4
propanol	0.5	0.5	47.45	39.8655	4	4
propanol	0.6	0.4	54.4	44.5963	4	4
propanol	0.7	0.3	61.52	50.6439	4	4
propanol	0.8	0.2	68.3	58.8161	4	4
propanol	0.9	0.1	72.9	70.6235	4	4
propanol	0.95	0.05	76.93	78.7547	4	4
propanol	1	0	79.5	89.1627	4	4
propyleneglycol	0	1	28.36	19.9977	3	3
propyleneglycol	0.04	0.96	29.185	20.8506	3	3
propyleneglycol	0.1	0.9	30.309	21.9401	3	3
propyleneglycol	0.15	0.85	31.422	22.9729	3	3
propyleneglycol	0.25	0.75	33.965	25.2685	3	3
propyleneglycol	0.35	0.65	36.808	27.8851	4	3
propyleneglycol	0.45	0.55	40.024	31.1398	4	3
propyleneglycol	0.5	0.5	42.011	33.1328	4	3
propyleneglycol	0.55	0.45	43.693	35.1174	4	4
propyleneglycol	0.56	0.44	44.08	35.5634	4	4
propyleneglycol	0.65	0.35	47.969	40.3339	4	4
propyleneglycol	0.75	0.25	53.2	47.5265	4	4
propyleneglycol	0.85	0.15	60.194	58.196	4	4
propyleneglycol	0.9	0.1	64.845	65.7329	4	4
propyleneglycol	0.91	0.09	66.097	67.6947	4	4
propyleneglycol	0.92	0.08	66.525	68.4062	4	4
propyleneglycol	0.93	0.07	67.848	70.6157	4	4
propyleneglycol	0.94	0.06	69.023	72.5777	4	4
propyleneglycol	0.95	0.05	70.704	75.5439	4	4
propyleneglycol	0.96	0.04	71.412	76.6184	4	4
propyleneglycol	0.96	0.04	72.096	77.7716	4	4
propyleneglycol	0.97	0.03	73.479	80.1339	4	4
propyleneglycol	0.98	0.02	75.028	82.7776	4	4
propyleneglycol	0.99	0.01	76.737	85.7137	4	4
propyleneglycol	0.99	0.01	77.092	86.3255	4	4
propyleneglycol	0.99	0.01	77.522	87.065	4	4
propyleneglycol	1	0	78.439	88.6431	4	4
1,3-propanediol	0	1	34.299	42.2092	3	4
1,3-propanediol	0.06	0.94	35.24	43.1926	4	4
1,3-propanediol	0.15	0.85	36.89	44.5042	4	4
1,3-propanediol	0.26	0.74	39.246	46.109	4	4
1,3-propanediol	0.35	0.65	41.53	47.6458	4	4
1,3-propanediol	0.46	0.54	44.359	49.6982	4	4
1,3-propanediol	0.5	0.5	45.665	50.8467	4	4
1,3-propanediol	0.55	0.45	47.4	52.262	4	4
1,3-propanediol	0.65	0.35	50.986	55.4903	4	4
1,3-propanediol	0.76	0.24	55.847	60.451	4	4
1,3-propanediol	0.85	0.15	62.114	67.6215	4	4
1,3-propanediol	0.91	0.09	67.008	73.6709	4	4
1,3-propanediol	0.91	0.09	67.624	74.4572	4	4
1,3-propanediol	0.93	0.07	68.741	75.8947	4	4
1,3-propanediol	0.94	0.07	69.778	77.2356	4	4
1,3-propanediol	0.95	0.05	72.097	80.2857	4	4
1,3-propanediol	0.96	0.04	72.196	80.4168	4	4
1,3-propanediol	0.96	0.04	72.772	81.1833	4	4
1,3-propanediol	0.97	0.03	74.051	82.8914	4	4
1,3-propanediol	0.98	0.02	75.446	84.7662	4	4
1,3-propanediol	0.99	0.01	76.844	86.6654	4	4
1,3-propanediol	0.99	0.01	77.205	87.1592	4	4
1,3-propanediol	1	0	77.666	87.7876	4	4
1,3-propanediol	1	0	78.439	88.8414	4	4
glycerol	0	1	44.06	38.4133	4	4
glycerol	0.38	0.62	45.95	45.3381	4	4
glycerol	0.58	0.42	58.33	50.9445	4	4
glycerol	0.72	0.28	62.16	56.664	4	4
glycerol	0.81	0.19	65.64	62.5989	4	4
glycerol	0.88	0.12	69.12	68.7392	4	4
glycerol	0.93	0.07	72.21	75.0577	4	4
glycerol	0.97	0.03	74.82	81.6842	4	4
glycerol	1	0	78.76	88.4489	4	4
2-pyrrolidon	0	1	28.173	39.1937	3	4
2-pyrrolidon	0.05	0.95	28.973	39.8929	3	4
2-pyrrolidon	0.15	0.85	32.132	42.1858	3	4
2-pyrrolidon	0.26	0.74	35.671	45.2632	4	4
2-pyrrolidon	0.35	0.65	39.103	48.6677	4	4
2-pyrrolidon	0.45	0.55	43.32	52.8786	4	4
2-pyrrolidon	0.5	0.5	45.734	55.2234	4	4
2-pyrrolidon	0.56	0.44	48.613	58.0251	4	4
2-pyrrolidon	0.64	0.36	53.063	62.6179	4	4
2-pyrrolidon	0.75	0.25	58.429	69.1572	4	4
2-pyrrolidon	0.85	0.15	63.088	75.8155	4	4
2-pyrrolidon	0.87	0.13	64.212	77.3089	4	4
2-pyrrolidon	0.89	0.11	65.105	78.4232	4	4
2-pyrrolidon	0.9	0.1	66.112	79.5954	4	4
2-pyrrolidon	0.92	0.08	68.159	81.7374	4	4
2-pyrrolidon	0.94	0.06	69.328	82.8294	4	4
2-pyrrolidon	0.95	0.05	71.074	84.325	4	4
2-pyrrolidon	0.97	0.03	72.677	85.5359	4	4
2-pyrrolidon	0.97	0.03	74.07	86.5403	4	4
2-pyrrolidon	0.99	0.01	76.671	88.2572	4	4
2-pyrrolidon	1	0	78.439	89.3299	4	4
tetrahydrothiophene-1,1-dioxide	0.39	0.61	49.27	44.6156	4	4
tetrahydrothiophene-1,1-dioxide	0.4	0.6	49.4	44.6401	4	4
tetrahydrothiophene-1,1-dioxide	0.46	0.54	51.23	44.9636	4	4
tetrahydrothiophene-1,1-dioxide	0.55	0.45	53.24	46.1687	4	4
tetrahydrothiophene-1,1-dioxide	0.61	0.39	54.14	47.5776	4	4
tetrahydrothiophene-1,1-dioxide	0.68	0.32	56.25	49.939	4	4
tetrahydrothiophene-1,1-dioxide	0.76	0.24	59.38	54.0333	4	4
tetrahydrothiophene-1,1-dioxide	0.78	0.22	60.1	55.2559	4	4
tetrahydrothiophene-1,1-dioxide	0.87	0.13	65.16	64.4867	4	4
tetrahydrothiophene-1,1-dioxide	0.92	0.08	69.72	71.837	4	4
tetrahydrothiophene-1,1-dioxide	0.95	0.05	72.37	77.1325	4	4
tetrahydrothiophene-1,1-dioxide	0.98	0.02	76.1	84.7654	4	4
tetrahydrothiophene-1,1-dioxide	1	0	78.16	88.8269	4	4
tetrahydrothiophene-1,1-dioxide	1	0	78.35	89.2787	4	4
1,2-butanediol	0	1	22.569	26.8427	3	3
1,2-butanediol	0.05	0.95	23.328	27.8446	3	3
1,2-butanediol	0.15	0.85	25.345	29.8167	3	3
1,2-butanediol	0.25	0.75	27.684	31.74	3	3
1,2-butanediol	0.35	0.65	30.297	33.835	3	3
1,2-butanediol	0.44	0.56	33.024	36.1127	3	4
1,2-butanediol	0.5	0.5	34.783	37.6553	3	4
1,2-butanediol	0.56	0.44	36.896	39.5771	4	4
1,2-butanediol	0.65	0.35	40.984	43.5244	4	4
1,2-butanediol	0.75	0.25	46.674	49.4758	4	4
1,2-butanediol	0.85	0.15	55.376	59.4511	4	4
1,2-butanediol	0.91	0.09	61.628	67.1168	4	4
1,2-butanediol	0.91	0.09	62.487	68.1982	4	4
1,2-butanediol	0.93	0.07	64.091	70.215	4	4
1,2-butanediol	0.94	0.06	65.593	72.1246	4	4
1,2-butanediol	0.95	0.05	68.781	76.2191	4	4
1,2-butanediol	0.96	0.04	69.121	76.6601	4	4
1,2-butanediol	0.96	0.04	69.78	77.5126	4	4
1,2-butanediol	0.97	0.03	71.741	80.0562	4	4
1,2-butanediol	0.98	0.02	73.936	82.918	4	4
1,2-butanediol	0.99	0.01	76.079	85.7241	4	4
1,2-butanediol	0.99	0.01	76.57	86.3674	4	4
1,2-butanediol	1	0	77.356	87.4008	4	4
1,2-butanediol	1	0	78.439	88.8231	4	4
1,3-butanediol	0	1	28.825	45.5701	3	4
1,3-butanediol	0.04	0.95	29.544	46.3601	3	4
1,3-butanediol	0.14	0.86	31.573	47.7753	3	4
1,3-butanediol	0.25	0.75	34.117	49.0177	3	4
1,3-butanediol	0.35	0.65	36.846	50.2046	4	4
1,3-butanediol	0.45	0.55	39.723	51.6684	4	4
1,3-butanediol	0.5	0.5	41.351	52.4843	4	4
1,3-butanediol	0.56	0.44	43.149	53.489	4	4
1,3-butanediol	0.65	0.35	46.845	55.9111	4	4
1,3-butanediol	0.75	0.25	51.865	59.9433	4	4
1,3-butanediol	0.85	0.15	58.459	66.2767	4	4
1,3-butanediol	0.91	0.09	64.284	72.5449	4	4
1,3-butanediol	0.92	0.08	65.101	73.457	4	4
1,3-butanediol	0.93	0.07	66.322	74.8336	4	4
1,3-butanediol	0.94	0.06	67.634	76.3265	4	4
1,3-butanediol	0.95	0.05	69.961	79.0045	4	4
1,3-butanediol	0.95	0.05	70.285	79.3848	4	4
1,3-butanediol	0.96	0.04	71.116	80.3454	4	4
1,3-butanediol	0.97	0.03	72.764	82.2719	4	4
1,3-butanediol	0.98	0.02	74.597	84.4225	4	4
1,3-butanediol	0.99	0.01	76.421	86.577	4	4
1,3-butanediol	0.99	0.01	76.875	87.1134	4	4
1,3-butanediol	1	0	77.504	87.8527	4	4
1,3-butanediol	1	0	78.439	88.9606	4	4
1,4-butadiol	0	1	31.822	40.8917	3	4
1,4-butadiol	0.06	0.94	32.587	41.4837	3	4
1,4-butadiol	0.15	0.85	34.281	42.9362	3	4
1,4-butadiol	0.25	0.75	36.14	43.8195	4	4
1,4-butadiol	0.35	0.65	38.491	44.9945	4	4
1,4-butadiol	0.45	0.55	40.945	46.553	4	4
1,4-butadiol	0.5	0.5	42.188	47.3241	4	4
1,4-butadiol	0.56	0.44	44.027	48.5805	4	4
1,4-butadiol	0.65	0.35	47.455	51.2858	4	4
1,4-butadiol	0.75	0.25	52.175	55.6833	4	4
1,4-butadiol	0.85	0.15	58.801	62.9478	4	4
1,4-butadiol	0.91	0.09	64.591	70.0972	4	4
1,4-butadiol	0.92	0.08	65.399	71.1391	4	4
1,4-butadiol	0.93	0.07	66.605	72.7139	4	4
1,4-butadiol	0.94	0.06	67.898	74.425	4	4
1,4-butadiol	0.95	0.05	70.501	77.9408	4	4
1,4-butadiol	0.95	0.04	70.605	78.0817	4	4
1,4-butadiol	0.96	0.04	71.312	79.0481	4	4
1,4-butadiol	0.97	0.03	72.924	81.2733	4	4
1,4-butadiol	0.98	0.02	74.711	83.7644	4	4
1,4-butadiol	0.99	0.01	76.486	86.2677	4	4
1,4-butadiol	0.99	0.01	76.923	86.8922	4	4
1,4-butadiol	1	0	77.531	87.7537	4	4
1,4-butadiol	1	0	78.439	89.0464	4	4
1,2-dimethoxyethane	0.05	0.95	7.777	6.6252	2	2
1,2-dimethoxyethane	0.16	0.84	9.052	7.9631	2	2
1,2-dimethoxyethane	0.24	0.76	10.141	9.4609	3	2
1,2-dimethoxyethane	0.35	0.65	11.669	11.7155	3	3
1,2-dimethoxyethane	0.45	0.55	14.074	14.766	3	3
1,2-dimethoxyethane	0.5	0.5	15.777	16.6272	3	3
1,2-dimethoxyethane	0.56	0.45	18.169	18.936	3	3
1,2-dimethoxyethane	0.65	0.35	24.375	24.4508	3	3
1,2-dimethoxyethane	0.75	0.25	33.231	32.4459	3	3
1,2-dimethoxyethane	0.85	0.15	45.114	44.6713	4	4
1,2-dimethoxyethane	0.87	0.13	49.084	49.2747	4	4
1,2-dimethoxyethane	0.88	0.12	51.258	51.9185	4	4
1,2-dimethoxyethane	0.9	0.1	54.071	55.4413	4	4
1,2-dimethoxyethane	0.93	0.07	58.752	61.5841	4	4
1,2-dimethoxyethane	0.94	0.06	61.011	64.6481	4	4
1,2-dimethoxyethane	0.96	0.04	65.594	71.0533	4	4
1,2-dimethoxyethane	0.97	0.03	68.023	74.5236	4	4
1,2-dimethoxyethane	0.97	0.03	70.65	78.3205	4	4
1,2-dimethoxyethane	0.99	0.01	75.365	85.2206	4	4
diethyleneglycol	0.04	0.96	31.428	27.1946	3	3
diethyleneglycol	0.1	0.9	32.345	28.2657	3	3
diethyleneglycol	0.15	0.85	33.265	29.2591	3	3
diethyleneglycol	0.25	0.75	35.189	31.2078	4	3
diethyleneglycol	0.36	0.64	37.58	33.751	4	3
diethyleneglycol	0.45	0.55	40.069	36.2303	4	4
diethyleneglycol	0.5	0.5	41.55	37.77	4	4
diethyleneglycol	0.55	0.45	43.123	39.4761	4	4
diethyleneglycol	0.61	0.39	45.083	41.717	4	4
diethyleneglycol	0.65	0.35	46.803	43.8554	4	4
diethyleneglycol	0.75	0.25	51.504	49.8881	4	4
diethyleneglycol	0.85	0.15	58.128	59.1489	4	4
diethyleneglycol	0.9	0.1	62.895	66.0769	4	4
diethyleneglycol	0.91	0.09	63.76	67.3436	4	4
diethyleneglycol	0.92	0.09	64.509	68.4487	4	4
diethyleneglycol	0.92	0.08	65.704	70.2068	4	4
diethyleneglycol	0.94	0.07	67.035	72.1647	4	4
diethyleneglycol	0.95	0.05	69.775	76.2095	4	4
diethyleneglycol	0.96	0.04	70.756	77.656	4	4
diethyleneglycol	0.97	0.03	72.456	80.1639	4	4
diethyleneglycol	0.98	0.02	74.395	83.019	4	4
diethyleneglycol	0.99	0.01	76.115	85.5532	4	4
diethyleneglycol	0.99	0.01	76.634	86.3161	4	4
diethyleneglycol	0.99	0.01	77.208	87.1584	4	4
n-methyl-2-pyrrolidinone	0	1	32.17	30.2554	3	3
n-methyl-2-pyrrolidinone	0.05	0.95	33.019	31.3099	3	3
n-methyl-2-pyrrolidinone	0.17	0.83	35.117	34.0706	4	3
n-methyl-2-pyrrolidinone	0.25	0.75	36.991	36.2221	4	4
n-methyl-2-pyrrolidinone	0.35	0.65	39.876	39.6346	4	4
n-methyl-2-pyrrolidinone	0.45	0.55	43.201	43.7724	4	4
n-methyl-2-pyrrolidinone	0.5	0.5	44.854	46.0175	4	4
n-methyl-2-pyrrolidinone	0.55	0.45	46.611	48.4073	4	4
n-methyl-2-pyrrolidinone	0.65	0.35	51.03	54.2257	4	4
n-methyl-2-pyrrolidinone	0.75	0.25	56.89	61.0263	4	4
n-methyl-2-pyrrolidinone	0.85	0.15	64.428	69.3753	4	4
n-methyl-2-pyrrolidinone	0.87	0.13	66.147	71.4197	4	4
n-methyl-2-pyrrolidinone	0.88	0.12	67.064	72.5482	4	4
n-methyl-2-pyrrolidinone	0.9	0.1	68.353	74.1844	4	4
n-methyl-2-pyrrolidinone	0.93	0.07	70.722	77.379	4	4
n-methyl-2-pyrrolidinone	0.94	0.06	71.764	78.871	4	4
n-methyl-2-pyrrolidinone	0.96	0.04	73.608	81.633	4	4
n-methyl-2-pyrrolidinone	0.96	0.04	74.463	82.9223	4	4
n-methyl-2-pyrrolidinone	0.98	0.02	75.645	84.8161	4	4
n-methyl-2-pyrrolidinone	0.99	0.01	77.262	87.4792	4	4
n-methyl-2-pyrrolidinone	1	0	78.439	89.4621	4	4
1-vinyl-2-pyrrolidinone	0	1	21.242	23.7529	3	3
1-vinyl-2-pyrrolidinone	0.06	0.94	22.291	24.5741	3	3
1-vinyl-2-pyrrolidinone	0.16	0.84	24.461	26.449	3	3
1-vinyl-2-pyrrolidinone	0.25	0.75	27.294	28.5609	3	3
1-vinyl-2-pyrrolidinone	0.35	0.65	30.776	31.0195	3	3
1-vinyl-2-pyrrolidinone	0.45	0.55	34.744	34.3058	3	3
1-vinyl-2-pyrrolidinone	0.5	0.5	36.75	36.2997	4	4
1-vinyl-2-pyrrolidinone	0.55	0.45	38.875	38.4683	4	4
1-vinyl-2-pyrrolidinone	0.65	0.35	43.615	43.6529	4	4
1-vinyl-2-pyrrolidinone	0.75	0.25	49.479	50.2319	4	4
1-vinyl-2-pyrrolidinone	0.85	0.15	57.978	60.2411	4	4
1-vinyl-2-pyrrolidinone	0.88	0.12	60.355	63.2506	4	4
1-vinyl-2-pyrrolidinone	0.89	0.11	61.455	64.6787	4	4
1-vinyl-2-pyrrolidinone	0.9	0.1	63.145	66.9363	4	4
1-vinyl-2-pyrrolidinone	0.93	0.07	66.231	71.1979	4	4
1-vinyl-2-pyrrolidinone	0.94	0.06	67.645	73.2164	4	4
1-vinyl-2-pyrrolidinone	0.96	0.04	70.483	77.3728	4	4
1-vinyl-2-pyrrolidinone	0.96	0.04	71.976	79.5941	4	4
1-vinyl-2-pyrrolidinone	0.97	0.03	73.65	82.1082	4	4
1-vinyl-2-pyrrolidinone	0.99	0.01	76.467	86.382	4	4
1-vinyl-2-pyrrolidinone	1	0	78.439	89.3593	4	4
triethyleneglycol	0.04	0.96	23.676	10.6496	3	3
triethyleneglycol	0.08	0.92	24.321	11.0909	3	3
triethyleneglycol	0.15	0.85	25.245	11.8098	3	3
triethyleneglycol	0.25	0.75	26.775	12.98	3	3
triethyleneglycol	0.34	0.67	28.447	14.3404	3	3
triethyleneglycol	0.45	0.55	31.508	16.6174	3	3
triethyleneglycol	0.5	0.5	33.198	17.9046	3	3
triethyleneglycol	0.55	0.45	35.017	19.3694	4	3
triethyleneglycol	0.6	0.4	36.855	20.951	4	3
triethyleneglycol	0.65	0.35	39.329	23.3025	4	3
triethyleneglycol	0.75	0.25	44.724	29.5124	4	3
triethyleneglycol	0.85	0.15	52.108	40.4384	4	4
triethyleneglycol	0.9	0.1	57.62	49.9841	4	4
triethyleneglycol	0.91	0.09	58.579	51.7137	4	4
triethyleneglycol	0.91	0.09	59.402	53.2258	4	4
triethyleneglycol	0.92	0.08	60.877	55.9475	4	4
triethyleneglycol	0.94	0.06	62.586	59.1445	4	4
triethyleneglycol	0.95	0.05	65.153	64.0245	4	4
triethyleneglycol	0.95	0.05	66.029	65.6975	4	4
triethyleneglycol	0.96	0.04	67.243	68.0348	4	4
triethyleneglycol	0.97	0.03	69.525	72.4593	4	4
triethyleneglycol	0.98	0.02	72.275	77.8012	4	4
triethyleneglycol	0.99	0.01	74.98	83.1058	4	4
triethyleneglycol	0.99	0.01	75.702	84.5229	4	4
triethyleneglycol	1	0	76.704	86.5052	4	4
